# Supplementary material for: 1-(Arylsulfonyl-isoindol-2-yl)piperazines as 5-HT6R Antagonists: Mechanochemical Synthesis, In Vitro Pharmacological Properties and Glioprotective Activity
Source: MDPI journal article supplement (doi:10.3390/biom13010012), 2022-12-21
Supplement: s1 [file s1]

# **1-(Arylsulfonyl-isoindol-2-yl)piperazines as 5-HT<sub>6</sub>R antagonists: mechanochemical synthesis, *in vitro* pharmacological properties and glioprotective activity**

**Vittorio Canale <sup>1,\*</sup>, Wojciech Trybała <sup>1</sup>, Séverine Chaumont-Dubel <sup>2</sup>, Paulina Koczurkiewicz-Adamczyk <sup>3</sup>,  
Grzegorz Satała <sup>4</sup>, Ophélie Bento <sup>2,5</sup>, Klaudia Blicharz-Futera <sup>1</sup>, Xavier Bantreil <sup>5,6</sup>, Elżbieta Pękała <sup>3</sup>,  
Andrzej J. Bojarski <sup>4</sup>, Frédéric Lamaty<sup>5</sup>, Philippe Marin <sup>2</sup> and Paweł Zajdel <sup>1</sup>**

<sup>1</sup> Department of Organic Chemistry, Faculty of Pharmacy, Jagiellonian University Medical College, 9 Medyczna Street, 30-688 Krakow, Poland

<sup>2</sup> Institut de Génomique Fonctionnelle, Université de Montpellier, CNRS, INSERM, 34094 Montpellier, France

<sup>3</sup> Department of Pharmaceutical Biochemistry, Faculty of Pharmacy, Jagiellonian University Medical College, 9 Medyczna Street, 30-688 Krakow, Poland

<sup>4</sup> Department of Medicinal Chemistry, Maj Institute of Pharmacology, Polish Academy of Sciences, 12 Smętna Street, 31-343 Krakow, Poland

<sup>5</sup> IBMM, Université de Montpellier, CNRS, ENSCM, 34095 Montpellier, France

<sup>6</sup> Institut Universitaire de France (IUF), 75005 Paris, France

\* Correspondence: vittorio.canale@uj.edu.pl

## **Table of contents**

### **Characterization Data**

|                                                                                               |    |
|-----------------------------------------------------------------------------------------------|----|
| 1. Characterization data for intermediate compounds <b>2a–l</b>                               | 3  |
| 2. UPLC/MS, <sup>1</sup> H NMR and <sup>13</sup> C NMR spectra of intermediates <b>2a–l</b>   | 7  |
| 3. UPLC/MS, <sup>1</sup> H NMR and <sup>13</sup> C NMR spectra of final compounds <b>3a–l</b> | 31 |

### **Supporting Materials**

|                                                                                                           |    |
|-----------------------------------------------------------------------------------------------------------|----|
| <b>Table S1–SI.</b> Optimization of milling conditions for sulfonylation of isoindolines <b>1a–d</b>      | 55 |
| <b>Table S2–SI.</b> Optimization of milling conditions for S <sub>N</sub> Ar of intermediates <b>2a–l</b> | 56 |
| <b>Figure S1–SI.</b> The effect of compound <b>3g</b> on cellular viability                               | 57 |

### **Procedures**

|                                                                                                |    |
|------------------------------------------------------------------------------------------------|----|
| 1. Procedure for radioligand binding assays                                                    | 58 |
| 2. Procedure for determination of functional activity at Gs signaling                          | 59 |
| 3. Procedure for evaluation of the effect of tested compounds on Cdk5-dependent neurite growth | 61 |

|                   |    |
|-------------------|----|
| <b>References</b> | 62 |
|-------------------|----|

## 1. Characterization data for intermediate compounds 2a–l

### 1.1. 2-[(4-Fluorophenyl)sulfonyl]isoindoline 2a

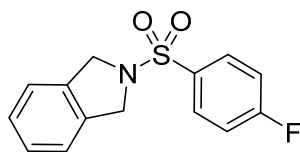

White solid, 194 mg (isolated yield 98%); UPLC/MS purity 100%,  $t_R = 7.29$ ;  $C_{14}H_{12}FNO_2S$ , MW 277.31, Monoisotopic Mass 277.06,  $[M+H]^+$  278.2.  $^1H$  NMR (500 MHz,  $CDCl_3$ )  $\delta$  ppm 4.62 (s, 4H), 7.15–7.21 (m, 4H), 7.22–7.26 (m, 2H), 7.87–7.93 (m, 2H).  $^{13}C$  NMR (175 MHz,  $CDCl_3$ )  $\delta$  ppm 53.8, 116.6 (d,  $J_{C-F} = 22.3$  Hz), 122.8, 127.9, 130.3 (d,  $J_{C-F} = 9.1$  Hz), 133.1 (d,  $J_{C-F} = 3.0$  Hz), 135.9, 165.3 (d,  $J_{C-F} = 254.7$  Hz).

### 1.2. 4-Chloro-2-[(4-fluorophenyl)sulfonyl]isoindoline 2b

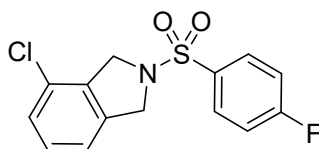

White solid, 168 mg (isolated yield 81%); UPLC/MS purity 100%,  $t_R = 8.07$ ;  $C_{14}H_{11}ClFNO_2S$ , MW 311.76, Monoisotopic Mass 311.02,  $[M+H]^+$  312.1.  $^1H$  NMR (500 MHz,  $CDCl_3$ )  $\delta$  ppm 4.60–4.64 (m, 2H), 4.65–4.69 (s, 2H), 7.02–7.09 (m, 1H), 7.16–7.27 (m, 4H), 7.88–7.93 (m, 2H).  $^{13}C$  NMR (126 MHz,  $CDCl_3$ )  $\delta$  ppm 53.4, 54.5, 116.7 (d,  $J_{C-F} = 2.3$  Hz), 121.0, 128.0, 129.2, 129.7, 130.3 (d,  $J_{C-F} = 9.7$  Hz), 133.0 (d,  $J_{C-F} = 3.0$  Hz), 134.8, 137.8, 165.4 (d,  $J_{C-F} = 255.3$  Hz).

### 1.3. 4-Bromo-2-[(4-fluorophenyl)sulfonyl]isoindoline 2c

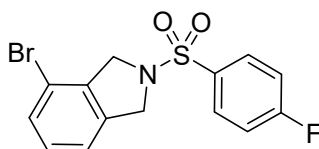

White solid, 177 mg (isolated yield 81%); UPLC/MS purity 100%,  $t_R = 8.19$ ;  $C_{14}H_{11}BrFNO_2S$ , MW 356.21, Monoisotopic Mass 354.97,  $[M+H]^+$  356.0/358.0.  $^1H$  NMR (500 MHz,  $CDCl_3$ )  $\delta$  ppm 4.58 (t,  $J = 2.0$  Hz, 2H), 4.70 (s, 2H), 7.08–7.17 (m, 2H), 7.18–7.24 (m, 2H), 7.33–7.39 (m, 1H), 7.88–7.94 (m, 2H).  $^{13}C$  NMR (175 MHz,  $CDCl_3$ )  $\delta$  ppm 54.7, 55.1, 116.7 ( $J_{C-F} = 22.9$  Hz), 117.5, 121.5, 129.8, 130.3 ( $J_{C-F} = 9.7$  Hz), 131.0, 133.0 ( $J_{C-F} = 3.6$  Hz), 136.9, 137.6, 165.4 ( $J_{C-F} = 255.3$  Hz).

#### 1.4. 5-Bromo-2-[(4-fluorophenyl)sulfonyl]isoindoline **2d**

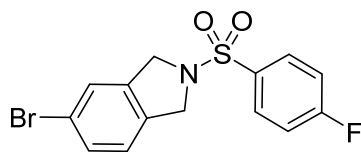

White solid, 189 mg (isolated yield 86%); UPLC/MS purity 98%,  $t_R = 8.05$ ;  $C_{14}H_{11}BrFNO_2S$ , MW 356.21, Monoisotopic Mass 354.97,  $[M+H]^+$  356.0/358.1.  $^1H$  NMR (500 MHz,  $CDCl_3$ )  $\delta$  ppm 4.55 (s, 2H), 4.59 (s, 2H), 7.04 (d,  $J = 8.3$  Hz, 1H), 7.16–7.25 (m, 2H), 7.31 (s, 1H), 7.33–7.38 (m, 1H), 7.85–7.91 (m, 2H).  $^{13}C$  NMR (126 MHz,  $CDCl_3$ )  $\delta$  ppm 53.3, 53.4, 116.7 ( $J_{C-F} = 22.9$  Hz), 121.7, 124.3, 126.0, 130.2 ( $J_{C-F} = 9.1$  Hz), 131.1, 132.9 ( $J_{C-F} = 3.0$  Hz), 134.9, 138.2, 165.4 ( $J_{C-F} = 255.3$  Hz).

#### 1.5. 2-[(3-Fluorophenyl)sulfonyl]isoindoline **2e**

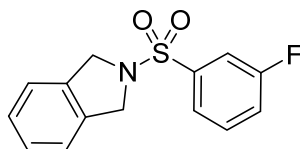

White solid, 190 mg (isolated yield 96%); UPLC/MS purity 100%,  $t_R = 7.39$ ;  $C_{14}H_{12}FNO_2S$ , MW 277.31, Monoisotopic Mass 277.06,  $[M+H]^+$  278.2.  $^1H$  NMR (500 MHz,  $CDCl_3$ )  $\delta$  ppm 4.64 (s, 4H), 7.16–7.20 (m, 2H), 7.22–7.26 (m, 2H), 7.26–7.29 (m, 1H), 7.51 (td,  $J = 8.1, 5.3$  Hz, 1H), 7.59 (dq,  $J = 8.3, 1.5$  Hz, 1H), 7.67 (dq,  $J = 7.7, 0.9$  Hz, 1H).  $^{13}C$  NMR (175 MHz,  $CDCl_3$ )  $\delta$  ppm 53.9, 114.9 ( $J_{C-F} = 24.1$  Hz), 120.2 ( $J_{C-F} = 21.1$  Hz), 122.8, 123.3 ( $J_{C-F} = 3.0$  Hz), 128.0, 131.1 ( $J_{C-F} = 7.8$  Hz), 135.8, 139.0 ( $J_{C-F} = 6.6$  Hz), 162.7 ( $J_{C-F} = 252.3$  Hz).

#### 1.6. 4-Chloro-2-[(3-fluorophenyl)sulfonyl]isoindoline **2f**

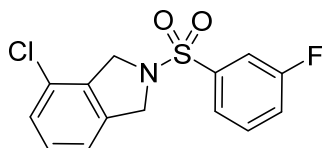

White solid, 156 mg (isolated yield 75%); UPLC/MS purity 100%,  $t_R = 8.13$ ;  $C_{14}H_{11}ClFNO_2S$ , MW 311.76, Monoisotopic Mass 311.02,  $[M+H]^+$  312.1.  $^1H$  NMR (500 MHz,  $CDCl_3$ )  $\delta$  ppm 4.61–4.66 (m, 2H), 4.67–4.71 (m, 2H), 7.03–7.10 (m, 1H), 7.17–7.22 (m, 2H), 7.26–7.32 (m, 1H), 7.49–7.55 (m, 1H), 7.57–7.61 (m, 1H), 7.66–7.70 (m, 1H).  $^{13}C$  NMR (126 MHz,  $CDCl_3$ )  $\delta$  ppm 53.4, 54.5, 114.9 (d,  $J_{C-F} = 24.7$  Hz), 120.3 (d,  $J_{C-F} = 21.1$  Hz), 121.0, 123.3 (d,  $J_{C-F} = 3.0$  Hz), 128.0, 129.2, 129.7, 131.2 (d,  $J_{C-F} = 7.2$  Hz), 134.7, 137.8, 138.9 (d,  $J_{C-F} = 6.6$  Hz), 162.7 (d,  $J_{C-F} = 251.7$  Hz).

**1.7. 4-Bromo-2-[(3-fluorophenyl)sulfonyl]isoindoline 2g**

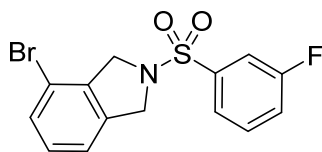

White solid, 173 mg (isolated yield 79%); UPLC/MS purity 100%,  $t_R$  = 8.12;  $C_{14}H_{11}BrFNO_2S$ , MW 356.21, Monoisotopic Mass 354.97,  $[M+H]^+$  356.0/358.0.  $^1H$  NMR (500 MHz,  $CDCl_3$ )  $\delta$  ppm 4.60 (t,  $J$  = 2.0 Hz, 2H), 4.72 (t,  $J$  = 2.0 Hz, 2H), 7.09–7.14 (m, 2H), 7.29 (tdd,  $J$  = 8.3, 2.6, 0.9 Hz, 1H), 7.35–7.38 (m, 1H), 7.53 (td,  $J$  = 8.0, 5.4 Hz, 1H), 7.60 (ddd,  $J$  = 8.0, 2.6, 1.7 Hz, 1H), 7.68 (ddd,  $J$  = 7.7, 1.7, 0.9 Hz, 1H).  $^{13}C$  NMR (175 MHz,  $CDCl_3$ )  $\delta$  ppm 54.7, 55.1, 114.9 ( $J_{C-F}$  = 24.1 Hz), 117.5, 120.3 ( $J_{C-F}$  = 21.1 Hz), 121.6, 123.3 ( $J_{C-F}$  = 3.6 Hz), 129.8, 131.0, 131.3 ( $J_{C-F}$  = 7.2 Hz), 136.8, 137.6, 138.9 ( $J_{C-F}$  = 6.6 Hz), 162.7 ( $J_{C-F}$  = 251.7 Hz).

**1.8. 5-Bromo-2-[(3-fluorophenyl)sulfonyl]isoindoline 2h**

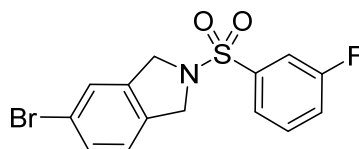

White solid, 186 mg (isolated yield 85%); UPLC/MS purity 100%,  $t_R$  = 8.12;  $C_{14}H_{11}BrFNO_2S$ , MW 356.21, Monoisotopic Mass 354.97,  $[M+H]^+$  356.0/358.0.  $^1H$  NMR (500 MHz,  $CDCl_3$ )  $\delta$  ppm 4.58 (d,  $J$  = 1.4 Hz, 2H), 4.61 (s, 2H), 7.05 (d,  $J$  = 8.3 Hz, 1H), 7.28 (tdd,  $J$  = 8.6, 8.6, 2.6, 0.9 Hz, 1H), 7.31–7.33 (m, 1H), 7.34–7.38 (m, 1H), 7.48–7.55 (m, 1H), 7.57 (dt,  $J$  = 8.0, 1.7 Hz, 1H), 7.66 (dt,  $J$  = 7.8, 1.3 Hz, 1H).  $^{13}C$  NMR (126 MHz,  $CDCl_3$ )  $\delta$  ppm 53.4, 53.5, 114.9 ( $J_{C-F}$  = 24.1 Hz), 120.3 ( $J_{C-F}$  = 21.7 Hz), 121.8, 123.3 ( $J_{C-F}$  = 3.0 Hz), 124.3, 126.0, 131.2, 131.3, 134.9, 138.1, 138.8 ( $J_{C-F}$  = 6.6 Hz), 162.7 ( $J_{C-F}$  = 252.3 Hz).

**1.9. 2-[(2-Fluorophenyl)sulfonyl]isoindoline 2i**

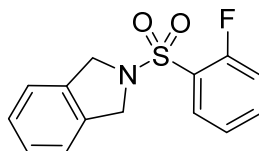

White solid, 184 mg (isolated yield 93%); UPLC/MS purity 100%,  $t_R$  = 7.26;  $C_{14}H_{12}FNO_2S$ , MW 277.31, Monoisotopic Mass 277.06,  $[M+H]^+$  278.2.  $^1H$  NMR (500 MHz,  $CDCl_3$ )  $\delta$  ppm 4.75 (s, 4H), 7.14–7.17 (m, 1H), 7.18–7.22 (m, 2H), 7.23–7.29 (m, 3H), 7.52–7.57 (m, 1H), 7.93–7.97 (m, 1H).  $^{13}C$  NMR (175 MHz,  $CDCl_3$ )  $\delta$  ppm 53.5, 117.5 ( $J_{C-F}$  = 21.7 Hz), 122.7, 124.48 ( $J_{C-F}$  = 3.62 Hz), 126.19 ( $J_{C-F}$  = 15.1 Hz), 127.9, 131.4, 135.1 ( $J_{C-F}$  = 8.45 Hz), 136.0, 159.0 ( $J_{C-F}$  = 245.0 Hz).

1.10. 4-Chloro-2-[(2-fluorophenyl)sulfonyl]isoindoline **2j**

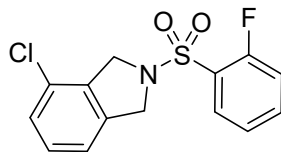

White solid, 164 mg (isolated yield 79%); UPLC/MS purity 100%,  $t_R$  = 8.02;  $C_{14}H_{11}ClFNO_2S$ , MW 311.76, Monoisotopic Mass 311.02,  $[M+H]^+$  312.1.  $^1H$  NMR (500 MHz,  $CDCl_3$ )  $\delta$  ppm 4.72–4.75 (m, 2H), 4.80–4.83 (m, 2H), 7.05–7.11 (m, 1H), 7.16–7.23 (m, 3H), 7.29 (td,  $J$  = 7.7, 1.1 Hz, 1H), 7.53–7.59 (m, 1H), 7.96 (ddd,  $J$  = 7.8, 6.9, 1.9 Hz, 1H).  $^{13}C$  NMR (126 MHz,  $CDCl_3$ )  $\delta$  ppm 53.1, 54.2, 117.5 ( $J_{C-F}$  = 21.7 Hz), 121.0, 124.6 ( $J_{C-F}$  = 3.6 Hz), 126.1 ( $J_{C-F}$  = 15.1 Hz), 127.9, 129.2, 129.6, 131.4, 134.9, 135.2 ( $J_{C-F}$  = 8.5 Hz), 138.0, 159.0 ( $J_{C-F}$  = 255.3 Hz).

1.11. 4-Bromo-2-[(2-fluorophenyl)sulfonyl]isoindoline **2k**

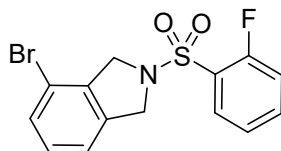

White solid, 180 mg (isolated yield 82%); UPLC/MS purity 100%,  $t_R$  = 8.15;  $C_{14}H_{11}BrFNO_2S$ , MW 356.21, Monoisotopic Mass 354.97,  $[M+H]^+$  356.0/358.0.  $^1H$  NMR (500 MHz,  $CDCl_3$ )  $\delta$  ppm 4.70 (s, 2H), 4.85 (s, 2H), 7.12–7.16 (m, 2H), 7.16–7.21 (m, 1H), 7.29 (td,  $J$  = 8.0, 1.1 Hz, 1H), 7.35–7.41 (m, 1H), 7.53–7.59 (m, 1H), 7.96 (ddd,  $J$  = 7.9, 7.0, 1.7 Hz, 1H).  $^{13}C$  NMR (175 MHz,  $CDCl_3$ )  $\delta$  ppm 54.5, 54.8, 117.5 ( $J_{C-F}$  = 23.5 Hz), 117.8, 121.5, 124.6 ( $J_{C-F}$  = 3.6 Hz), 126.1 ( $J_{C-F}$  = 15.1 Hz), 129.7, 130.9, 131.4, 135.2 ( $J_{C-F}$  = 8.5 Hz), 136.9, 137.8, 159.0 ( $J_{C-F}$  = 255.3 Hz).

1.12. 5-Bromo-2-[(2-fluorophenyl)sulfonyl]isoindoline **2l**

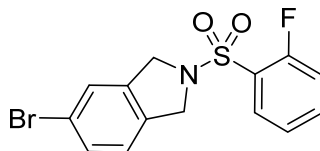

White solid, 189 mg (isolated yield 86%); UPLC/MS purity 100%,  $t_R$  = 8.04;  $C_{14}H_{11}BrFNO_2S$ , MW 356.21, Monoisotopic Mass 354.97,  $[M+H]^+$  356.0/358.1.  $^1H$  NMR (500 MHz,  $CDCl_3$ )  $\delta$  ppm 4.68 (s, 2H), 4.72 (s, 2H), 7.06 (d,  $J$  = 8.3 Hz, 1H), 7.14–7.21 (m, 1H), 7.28 (td,  $J$  = 7.7, 0.9 Hz, 1H), 7.33 (s, 1H), 7.35–7.39 (m, 1H), 7.52–7.58 (m, 1H), 7.92–7.96 (m, 1H).  $^{13}C$  NMR (126 MHz,  $CDCl_3$ )  $\delta$  ppm 53.1 (dd,  $J_{C-F}$  = 6.0, 3.0 Hz), 117.5 ( $J_{C-F}$  = 21.7 Hz), 121.7, 124.3, 124.6 ( $J_{C-F}$  = 3.6 Hz), 126.0 ( $J_{C-F}$  = 15.1 Hz), 126.1, 131.1, 131.4, 135.1, 135.2 ( $J_{C-F}$  = 8.5 Hz), 138.3, 159.0 ( $J_{C-F}$  = 255.3 Hz).

## 2. UPLC/MS, <sup>1</sup>H NMR and <sup>13</sup>C NMR spectra of all intermediates and final compounds

### 2.1. 2-[(4-Fluorophenyl)sulfonyl]isoindoline **2a**

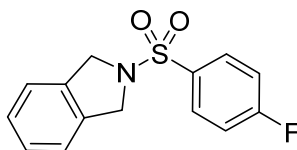

UPLC/MS

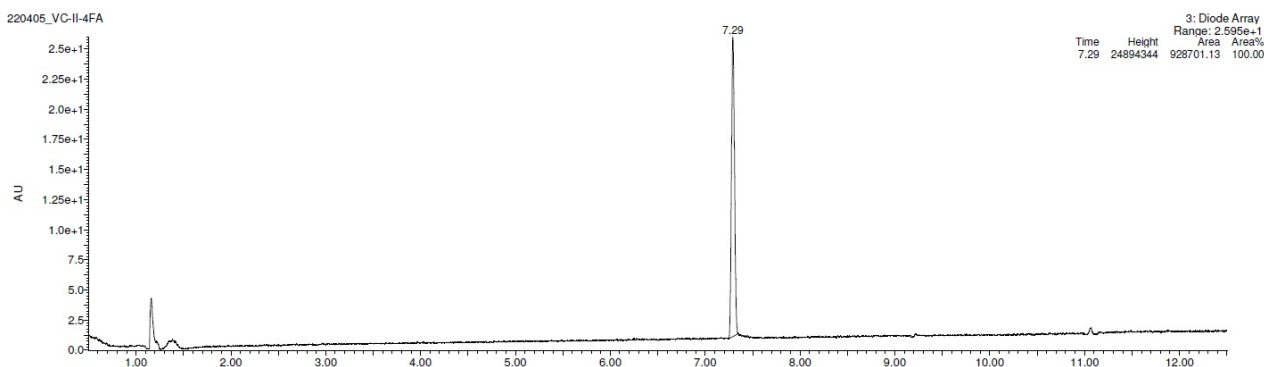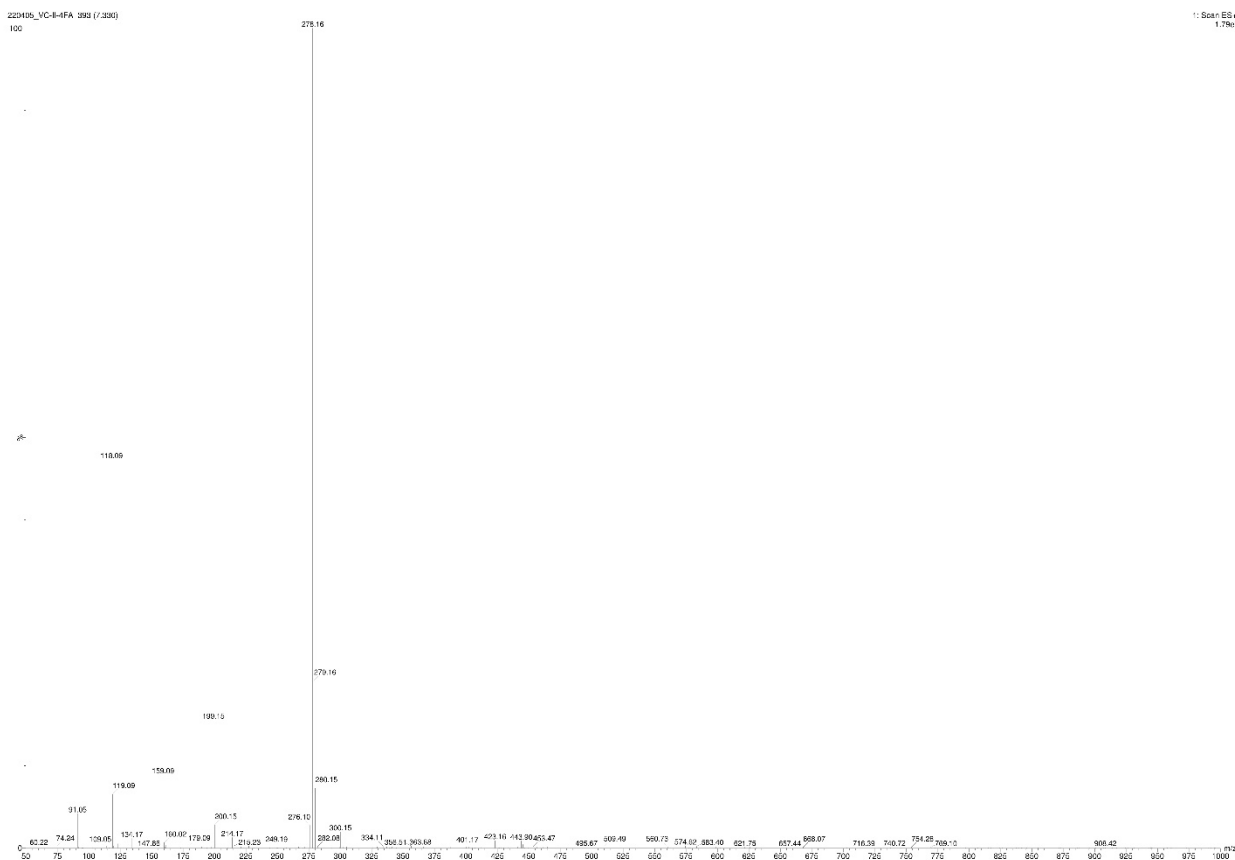

$^1\text{H}$ -NMR (500 MHz,  $\text{CDCl}_3$ )

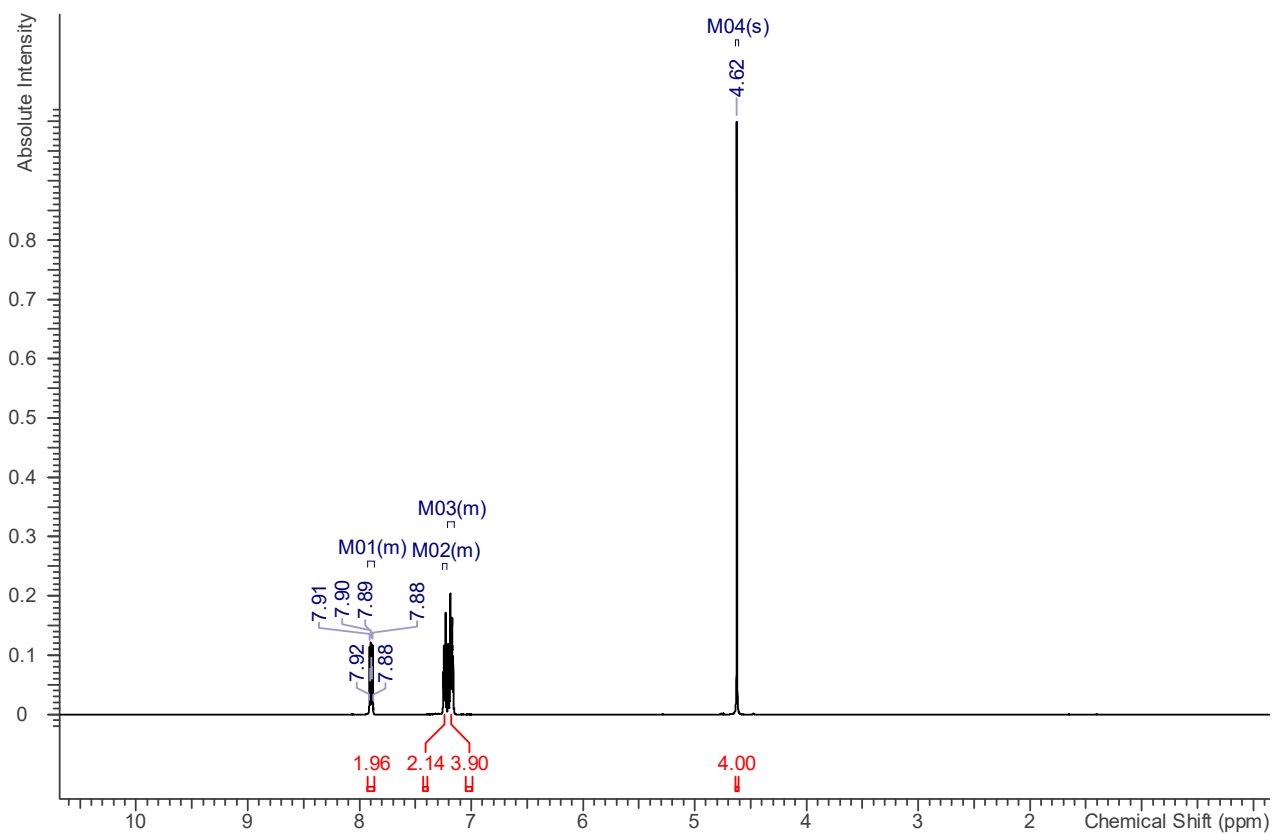

$^{13}\text{C}$ -NMR (126 MHz,  $\text{CDCl}_3$ )

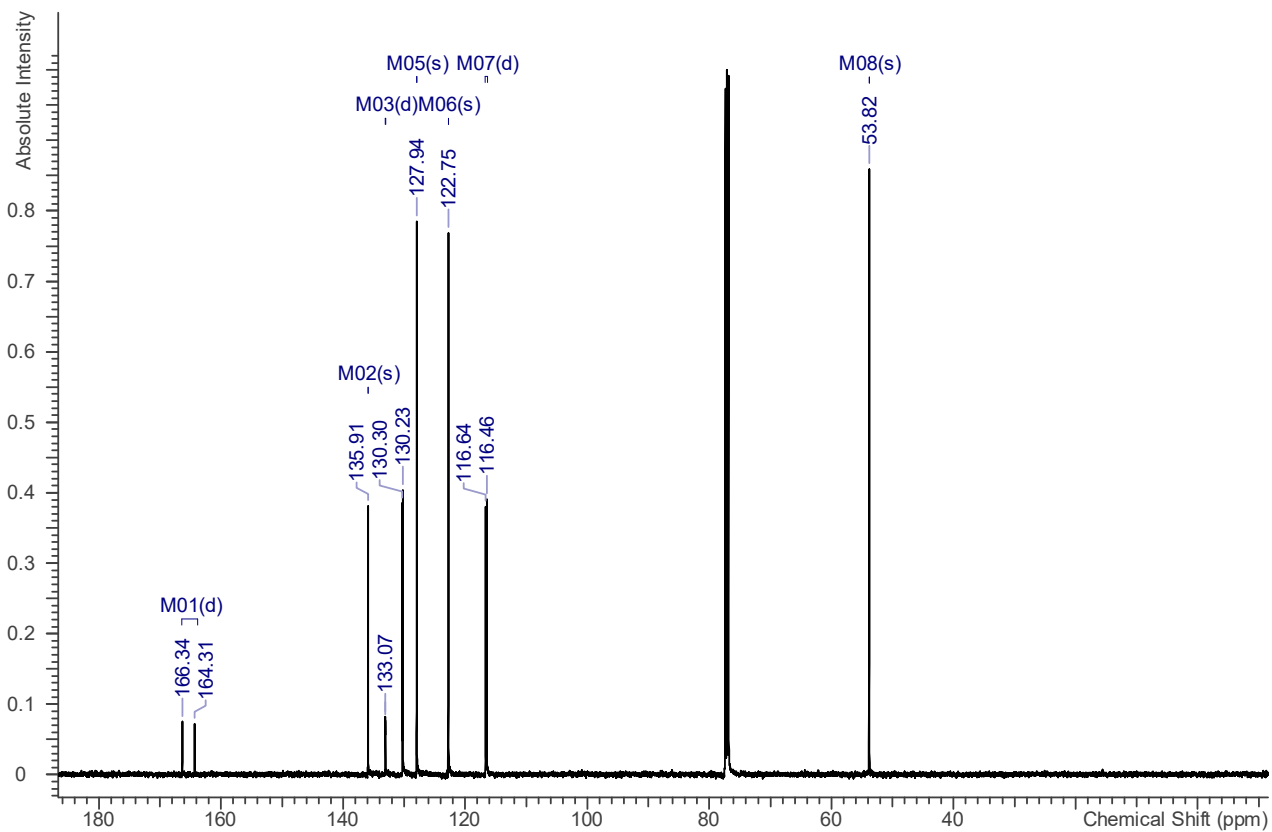



## 2.2. 4-Chloro-2-[(4-fluorophenyl)sulfonyl]isoindoline **2b**

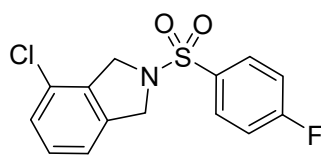

### UPLC/MS

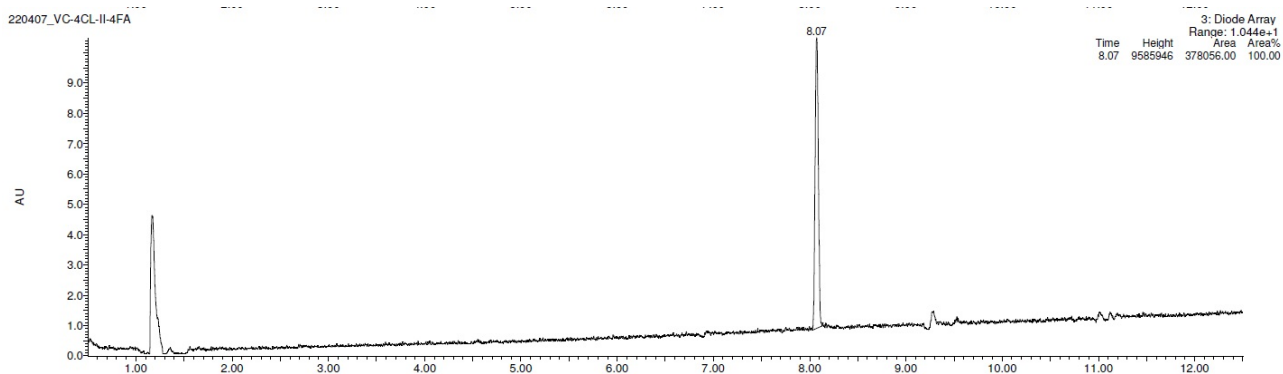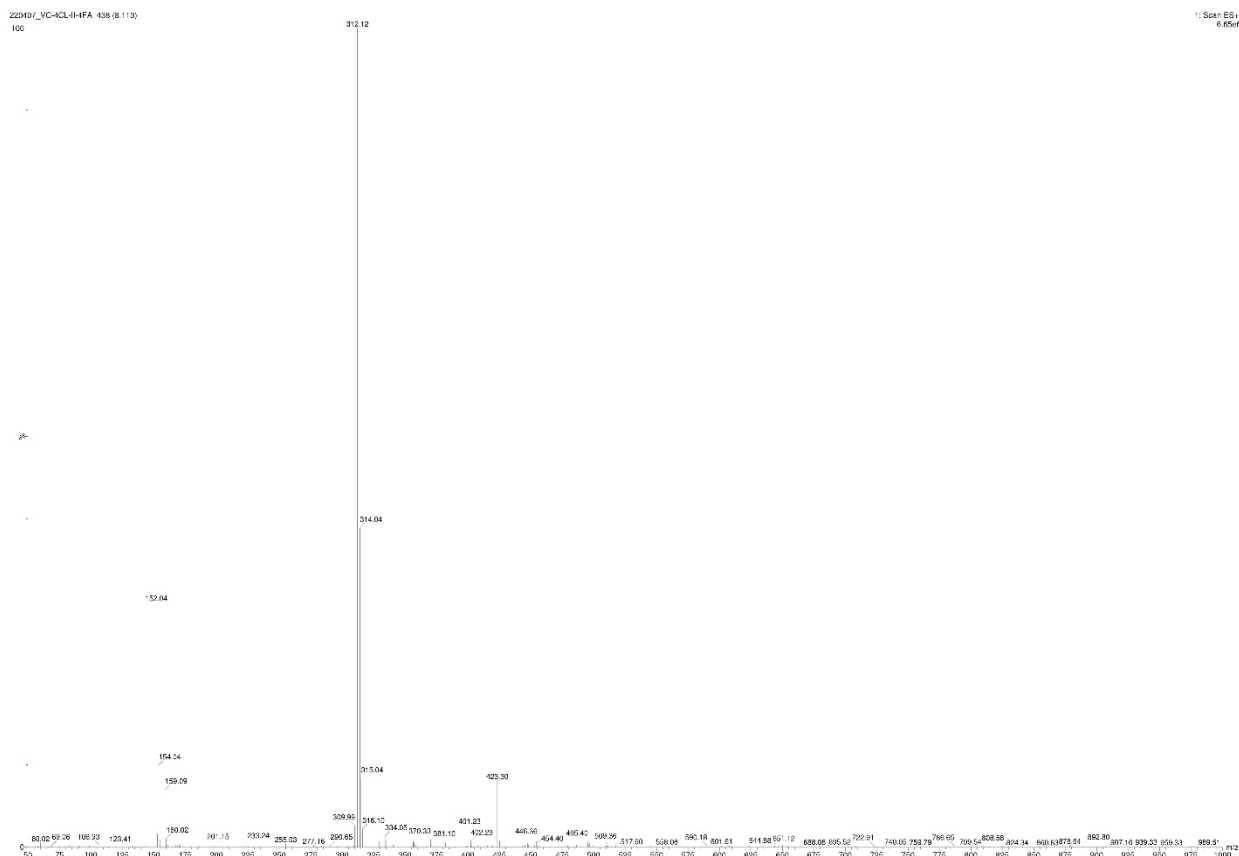

$^1\text{H}$ -NMR (500 MHz,  $\text{CDCl}_3$ )

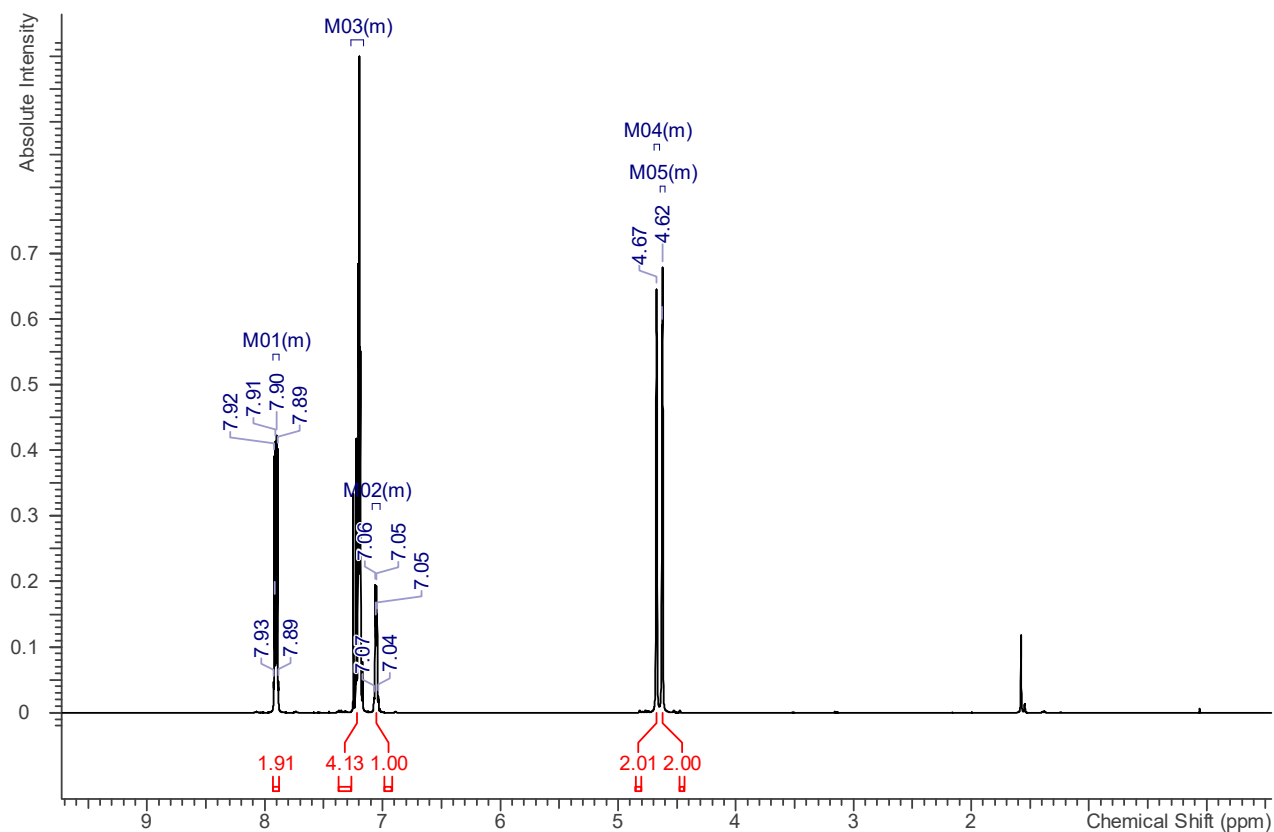

$^{13}\text{C}$ -NMR (126 MHz,  $\text{CDCl}_3$ )

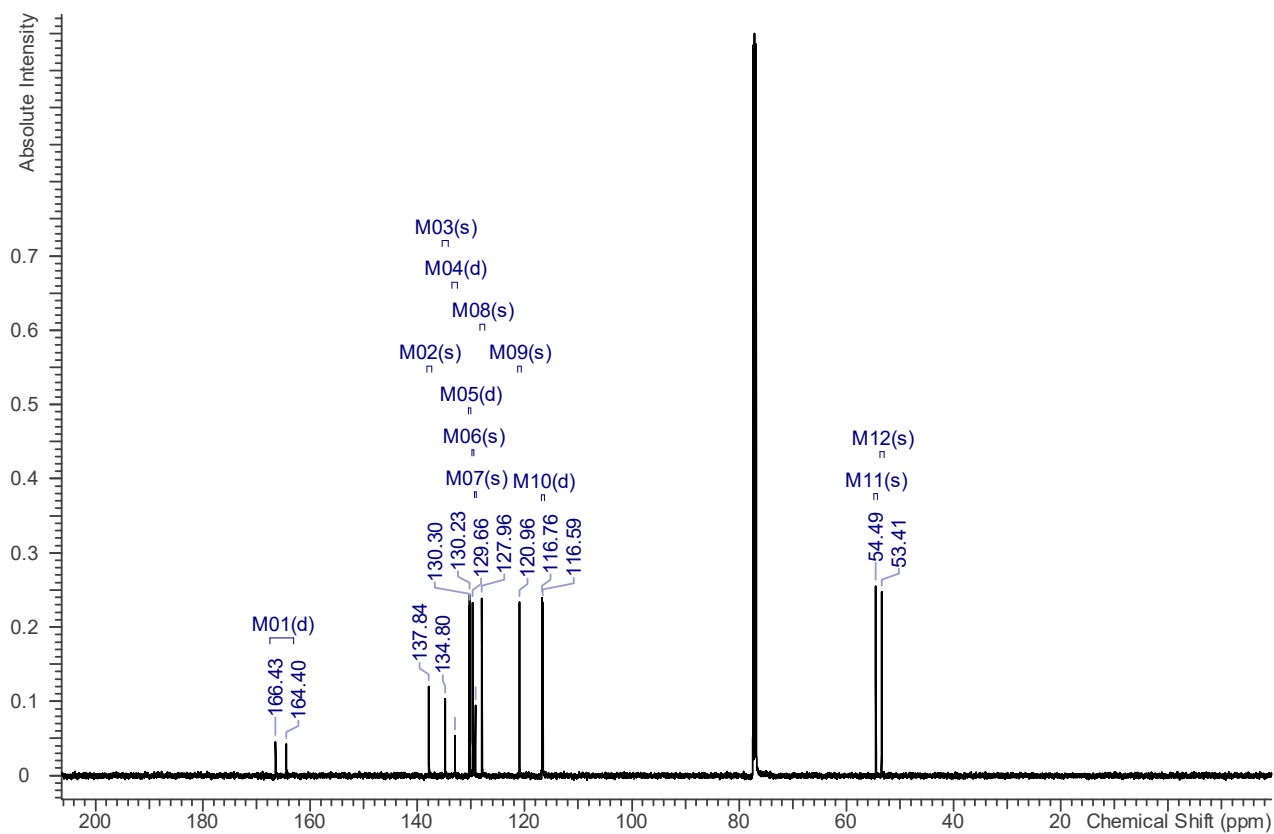

### 2.3. 4-Bromo-2-[(4-fluorophenyl)sulfonyl]isoindoline **2c**

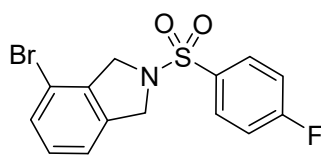

#### UPLC/MS

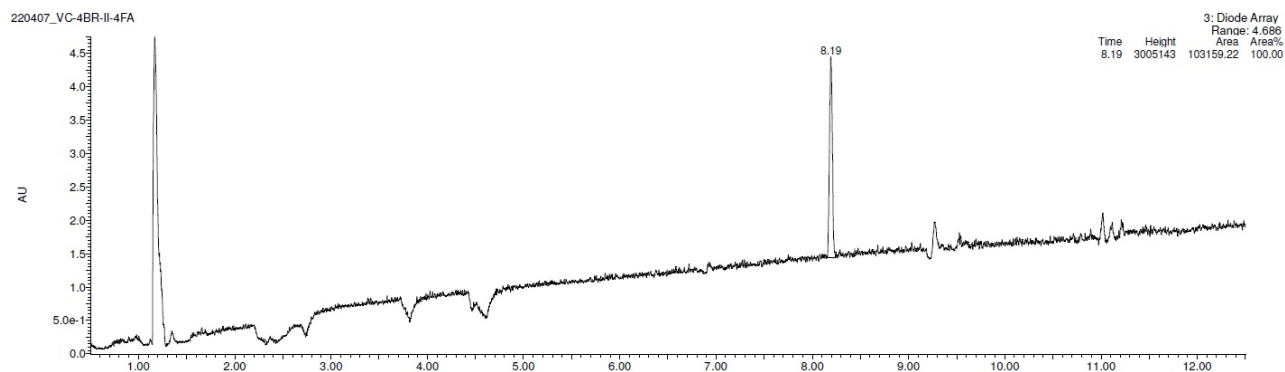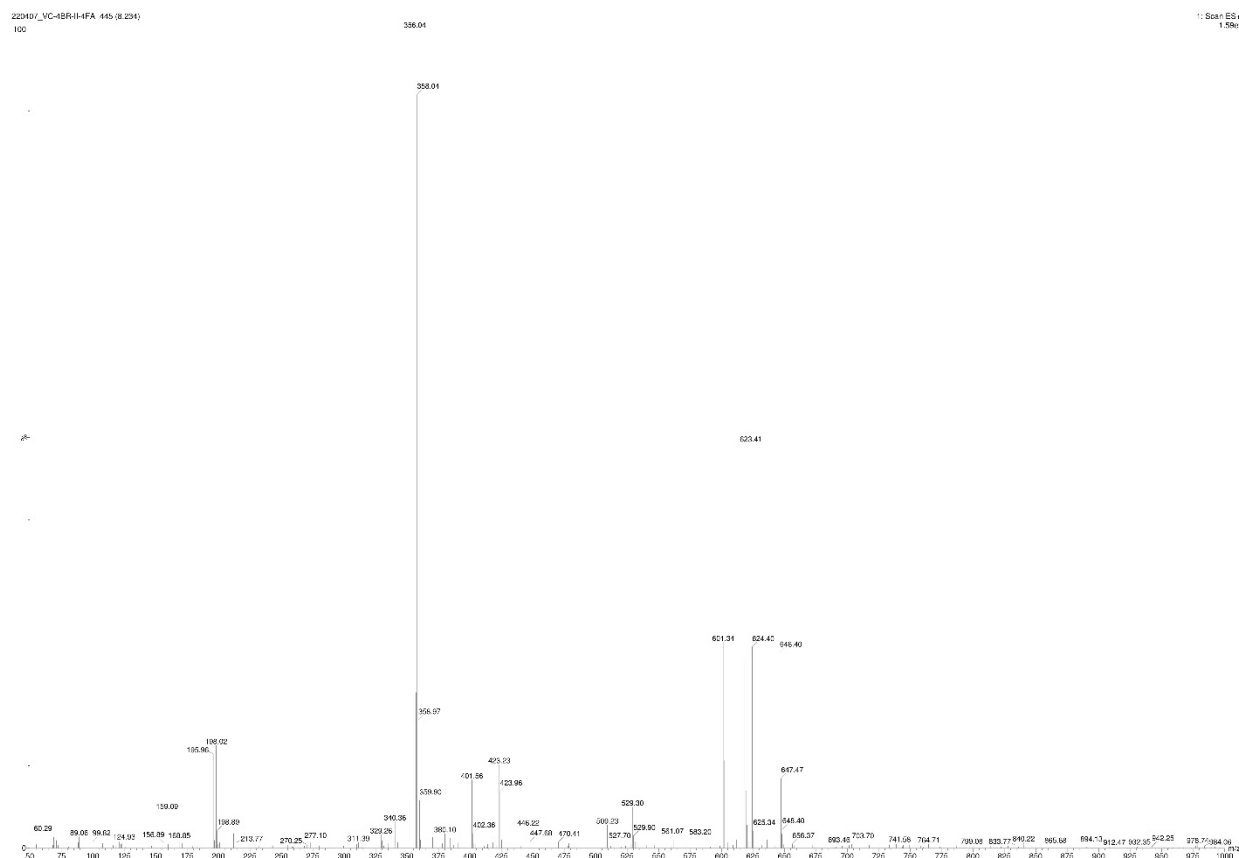

$^1\text{H}$ -NMR (500 MHz,  $\text{CDCl}_3$ )

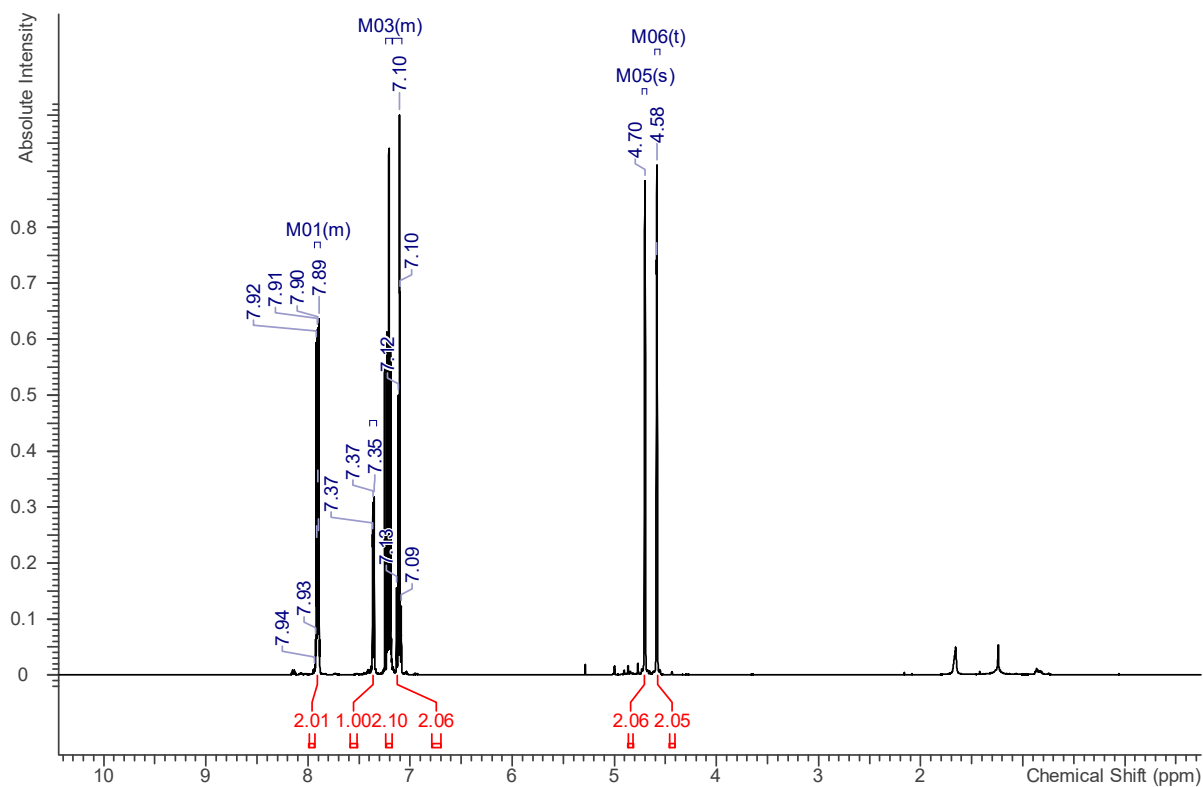

$^{13}\text{C}$ -NMR (126 MHz,  $\text{CDCl}_3$ )

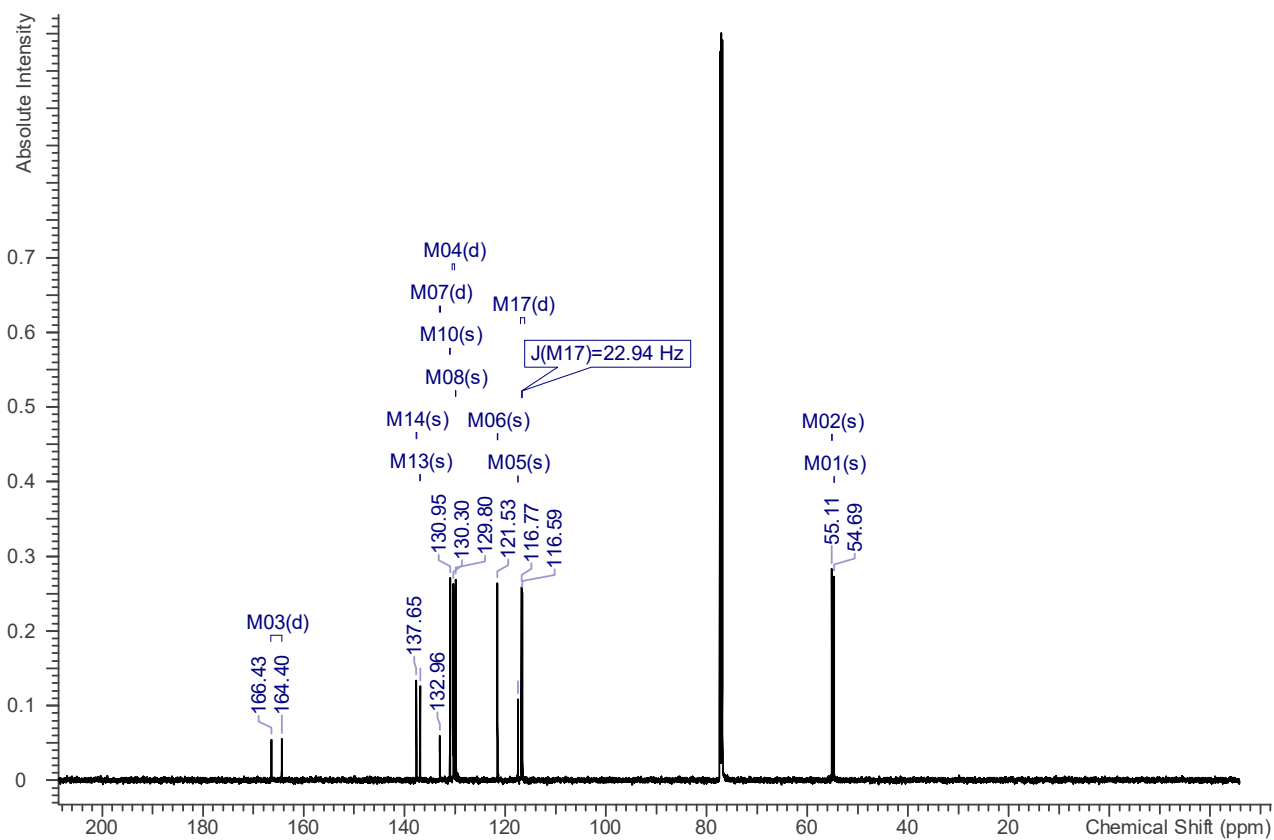

## 2.4. 5-Bromo-2-[(4-fluorophenyl)sulfonyl]isoindoline **2d**

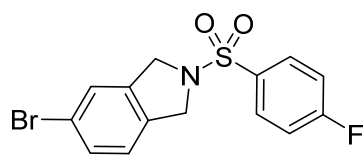

### UPLC/MS

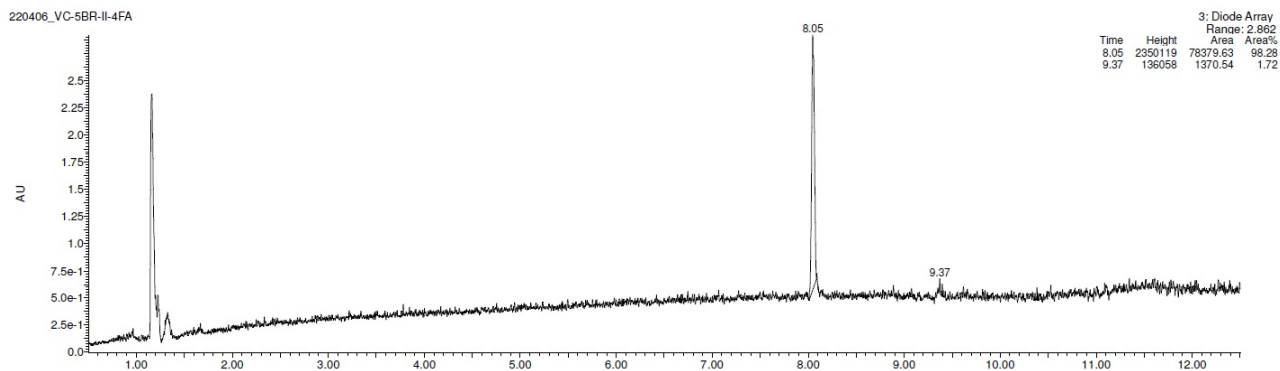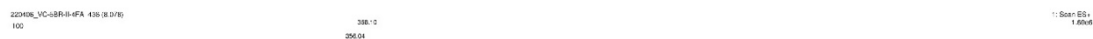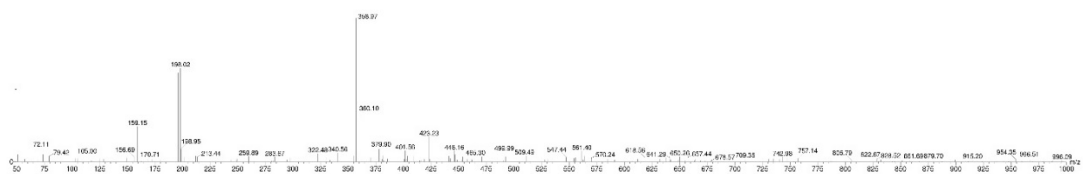

$^1\text{H}$ -NMR (500 MHz,  $\text{CDCl}_3$ )

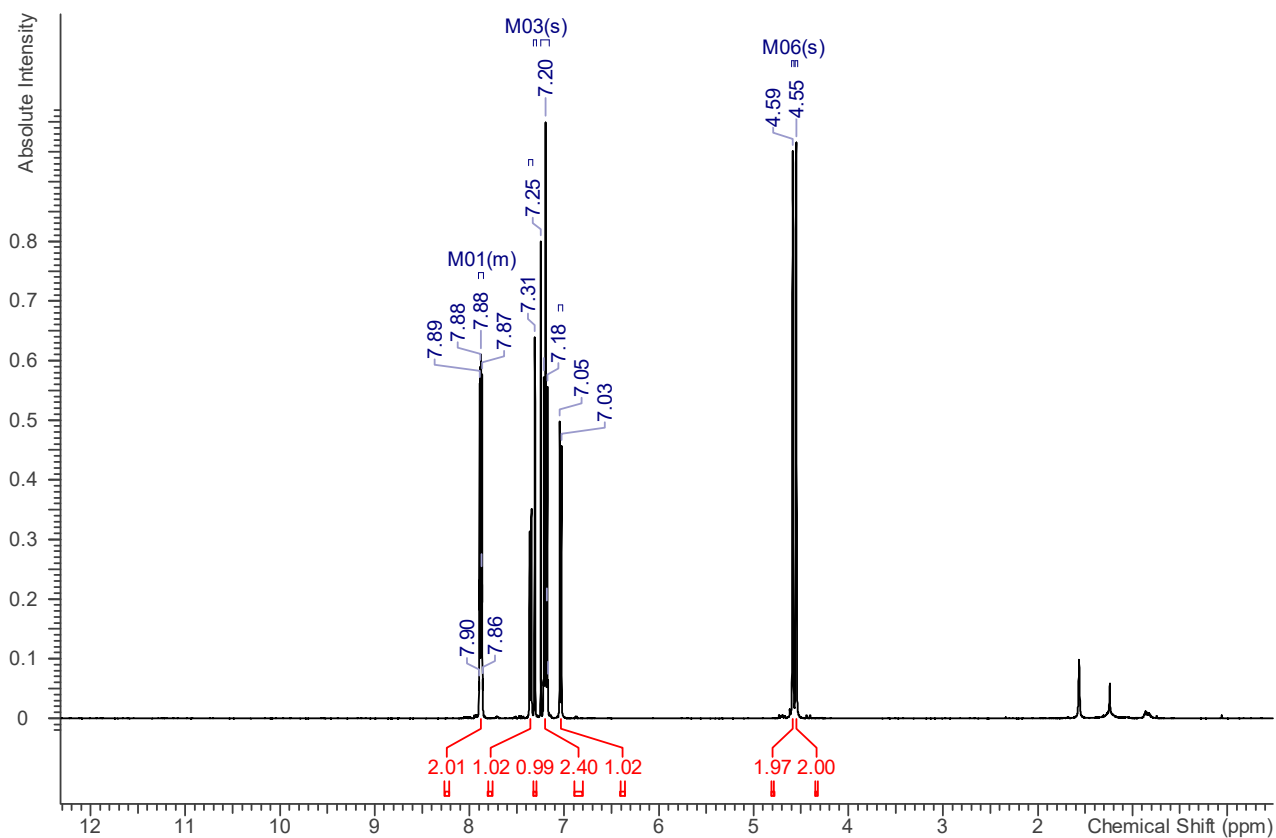

$^{13}\text{C}$ -NMR (126 MHz,  $\text{CDCl}_3$ )

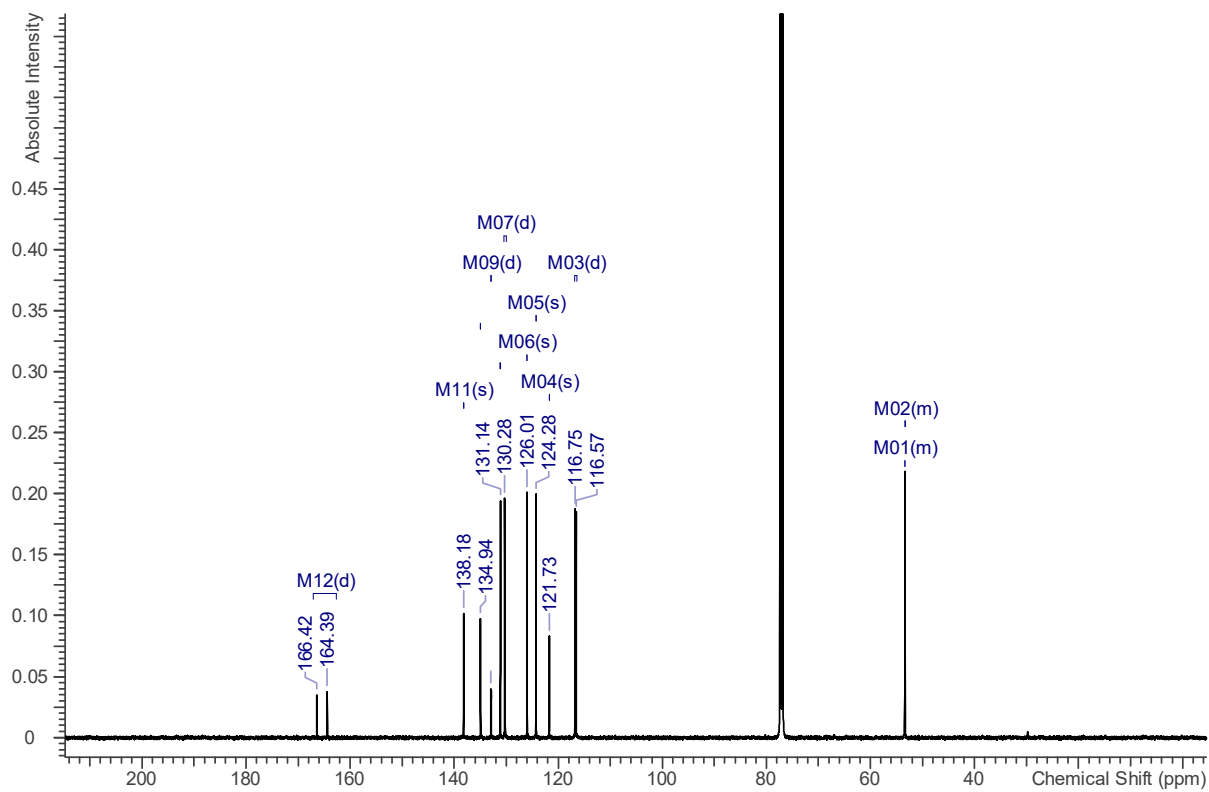

## 2.5. 2-[(3-Fluorophenyl)sulfonyl]isoindoline **2e**

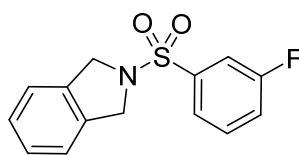

UPLC/MS

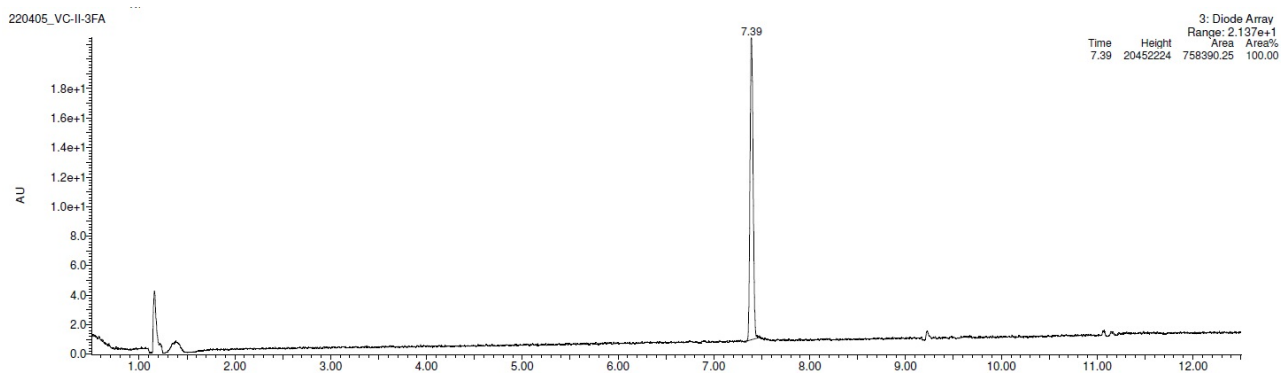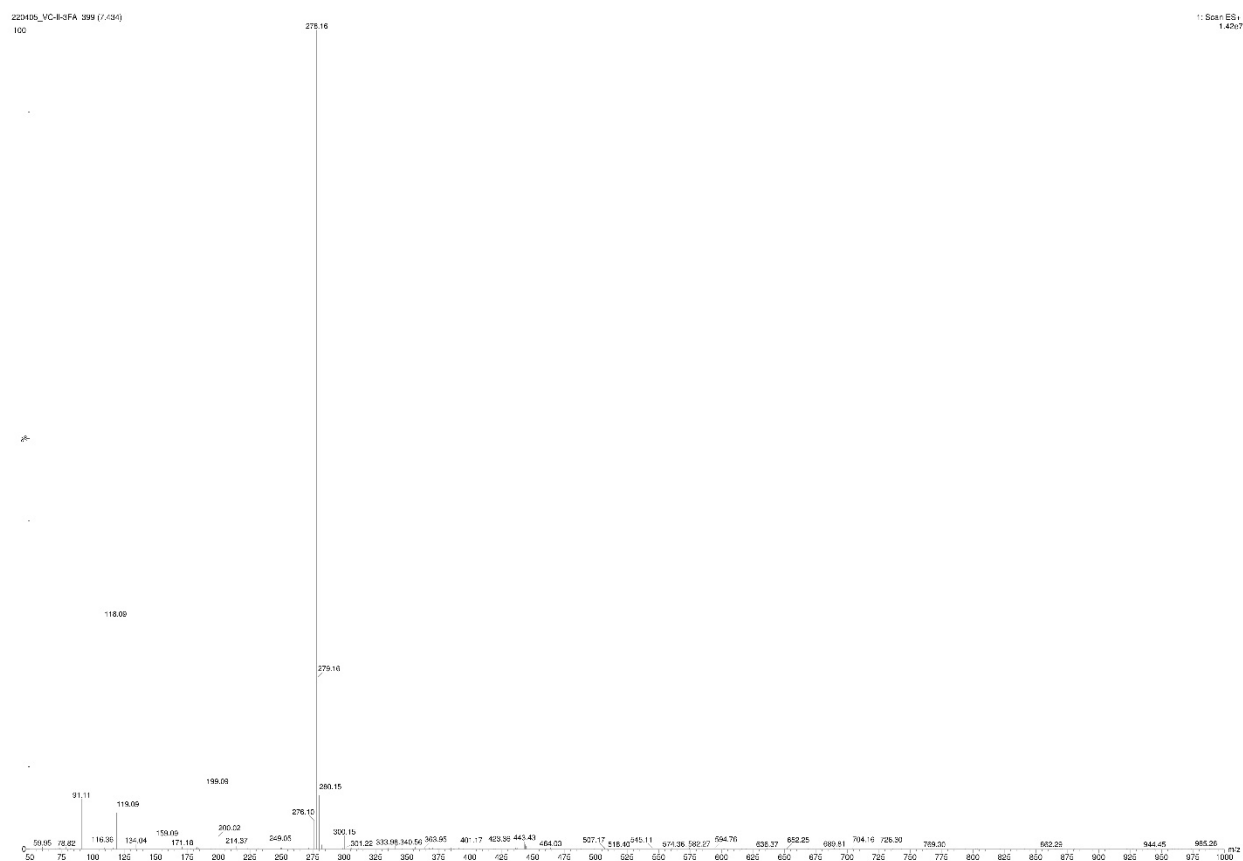

$^1\text{H}$ -NMR (500 MHz,  $\text{CDCl}_3$ )

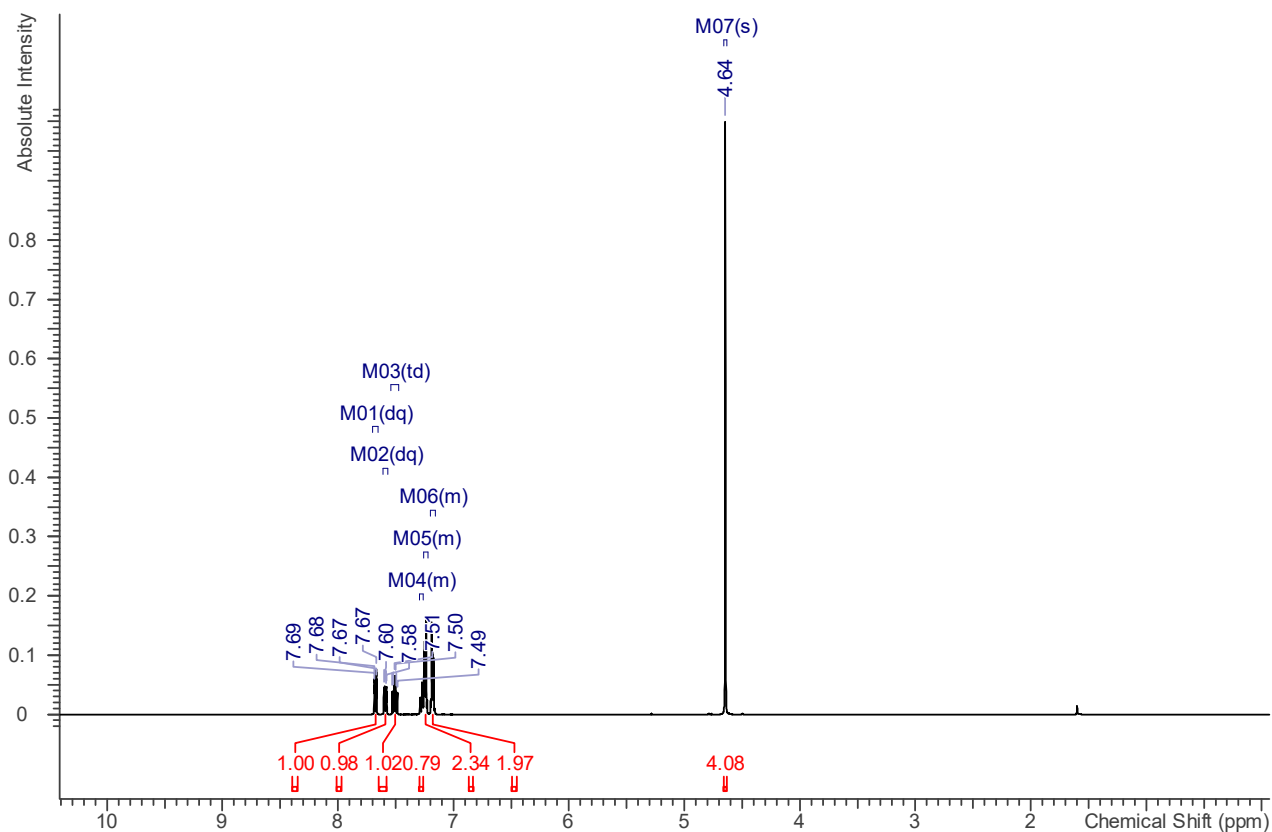

$^{13}\text{C}$ -NMR (126 MHz,  $\text{CDCl}_3$ )

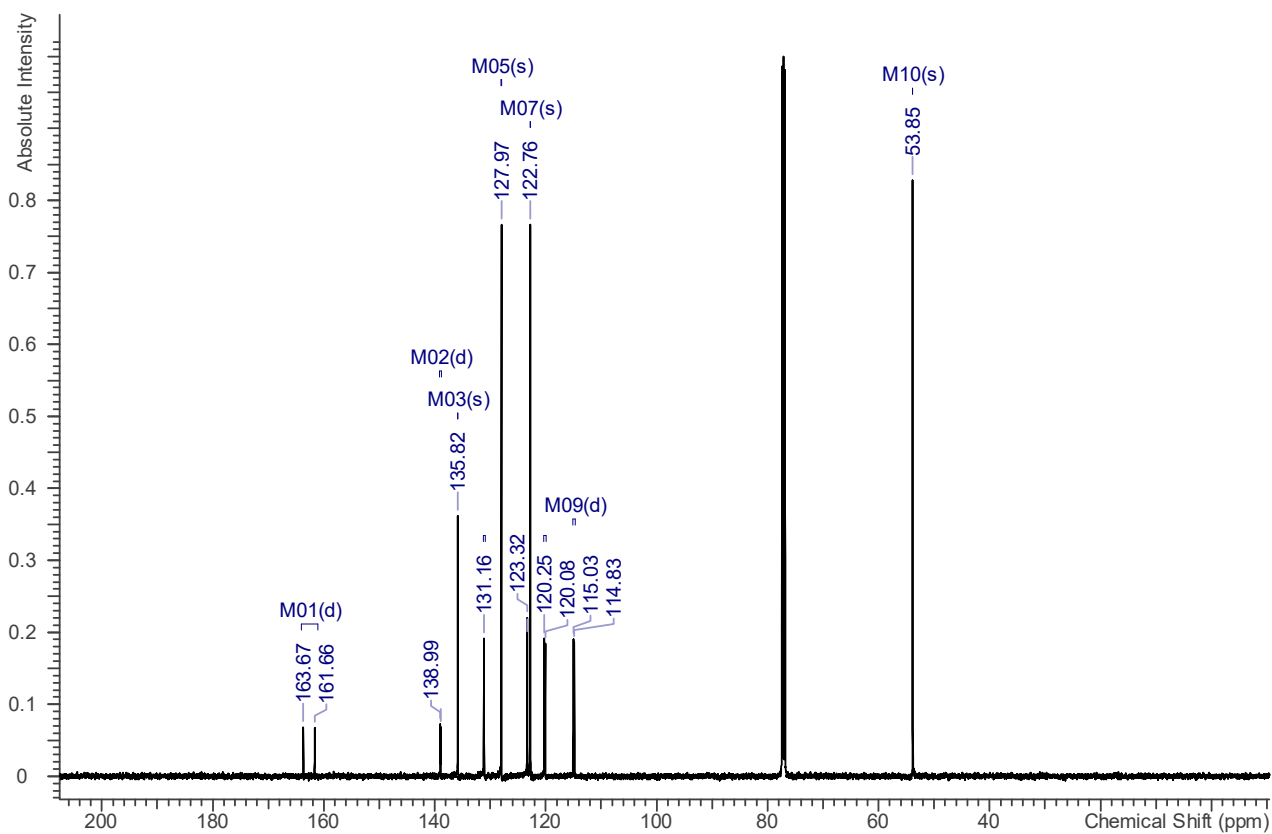



## 2.6. 4-Chloro-2-[(3-fluorophenyl)sulfonyl]isoindoline **2f**

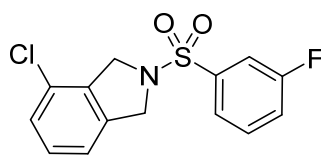

UPLC/MS

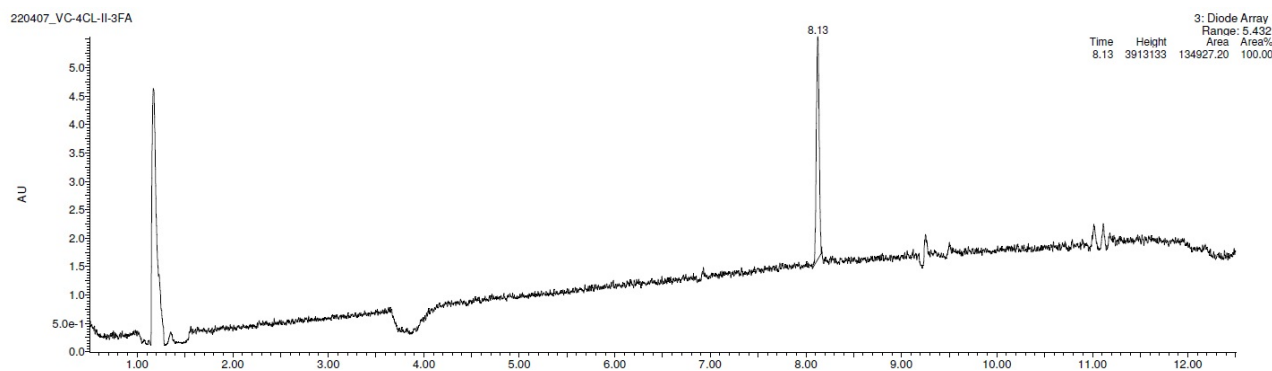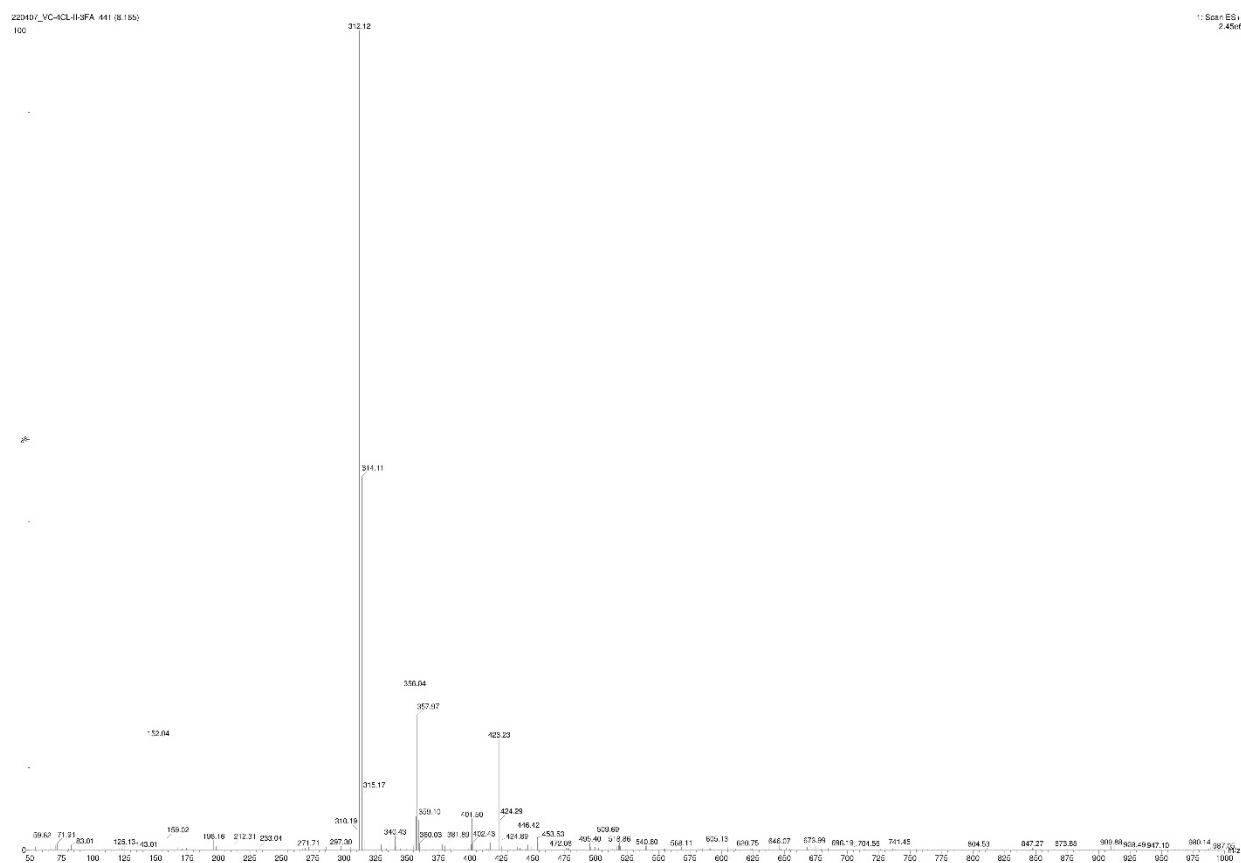

$^1\text{H}$ -NMR (500 MHz,  $\text{CDCl}_3$ )

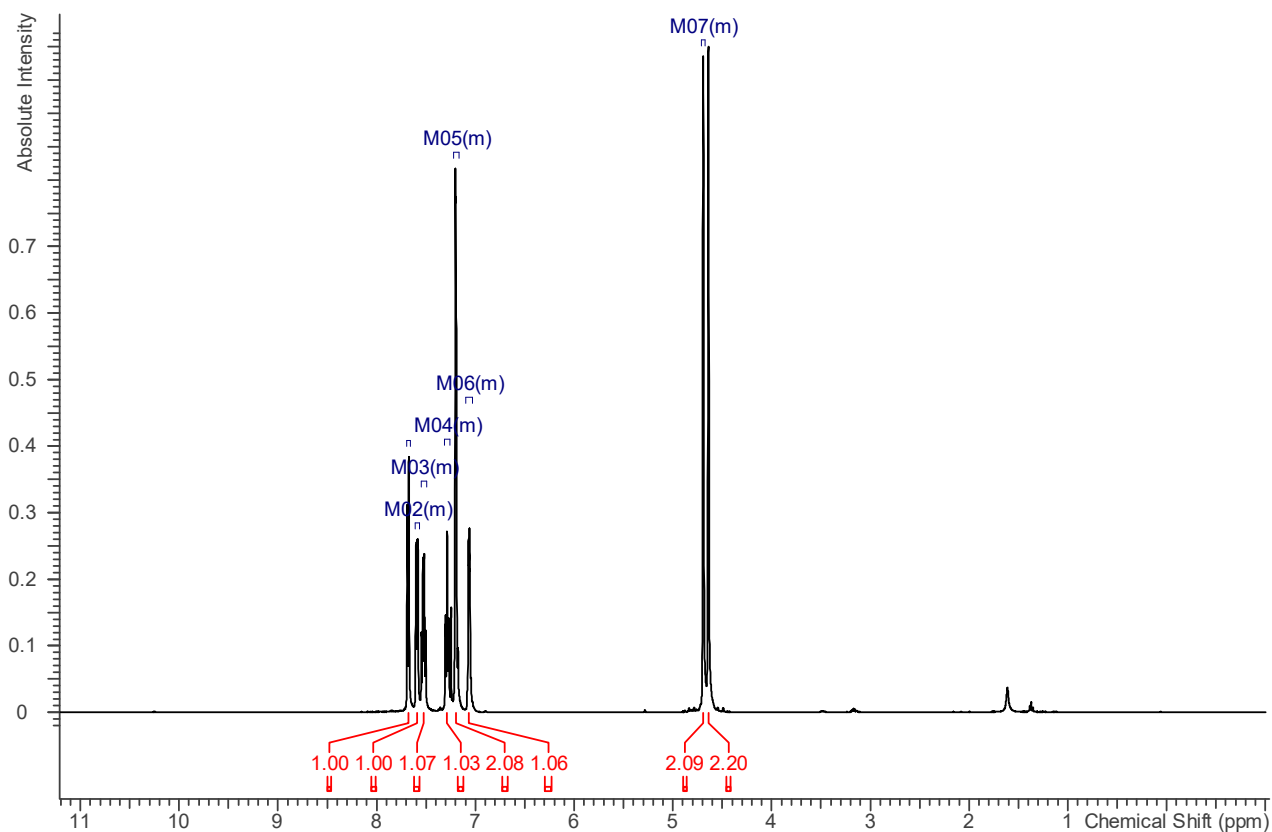

$^{13}\text{C}$ -NMR (126 MHz,  $\text{CDCl}_3$ )

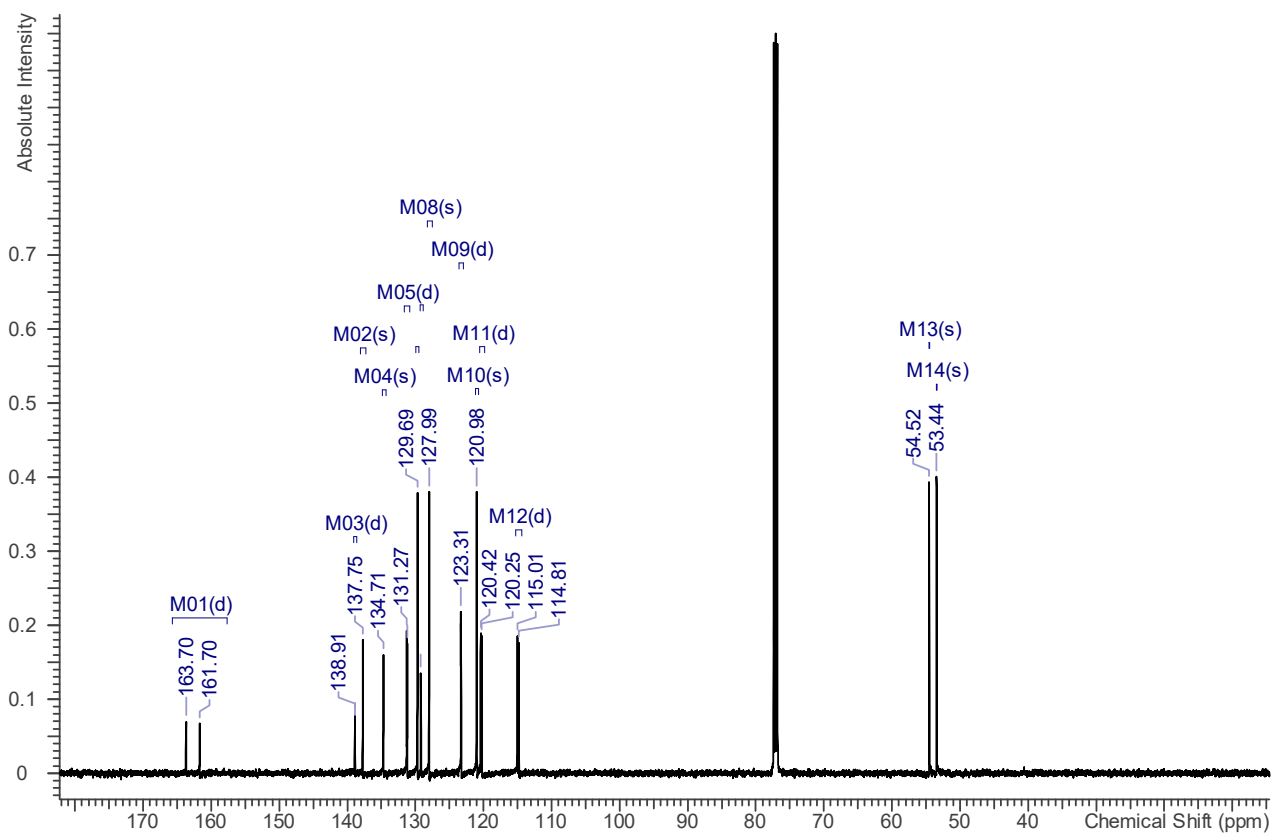

## 2.7. 4-Bromo-2-[(3-fluorophenyl)sulfonyl]isoindoline **2g**

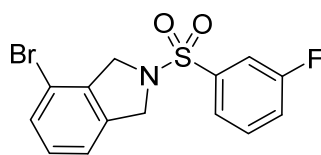

### UPLC/MS

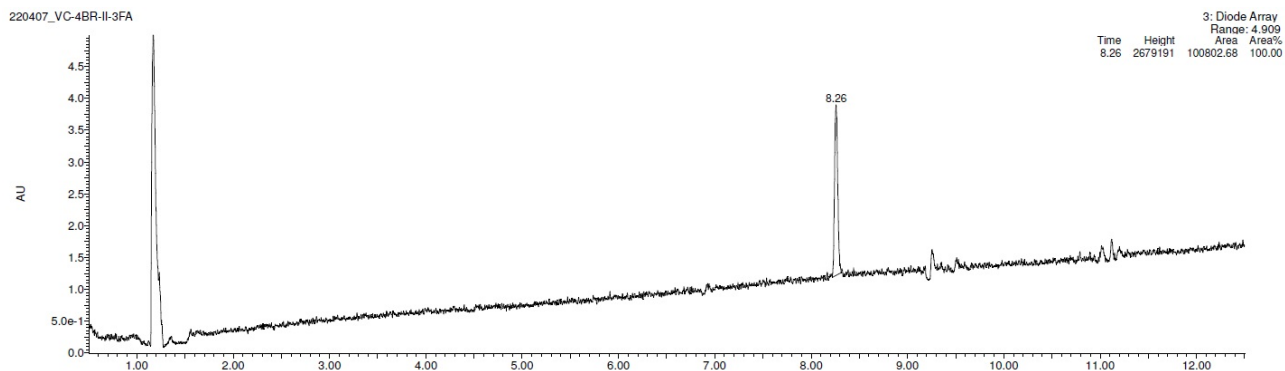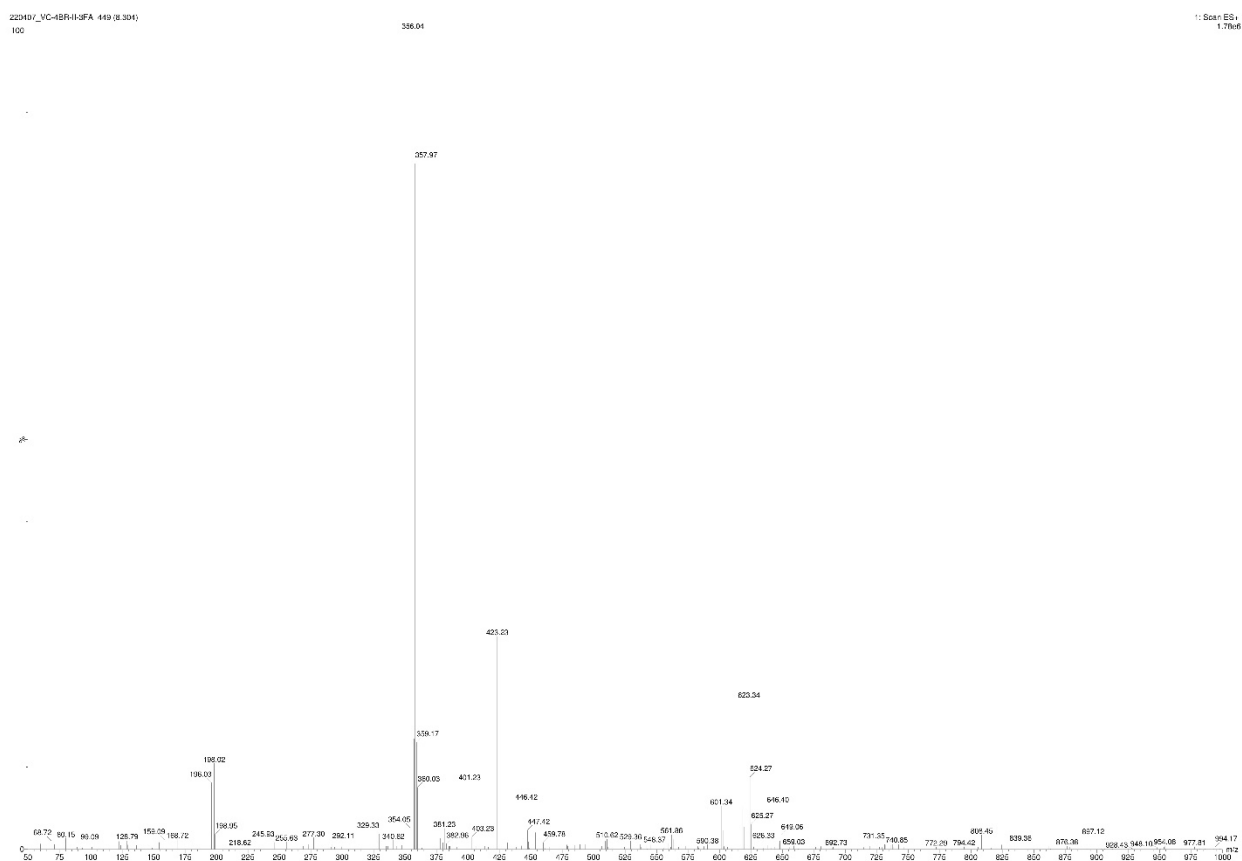

<sup>1</sup>H-NMR (500 MHz, CDCl<sub>3</sub>)

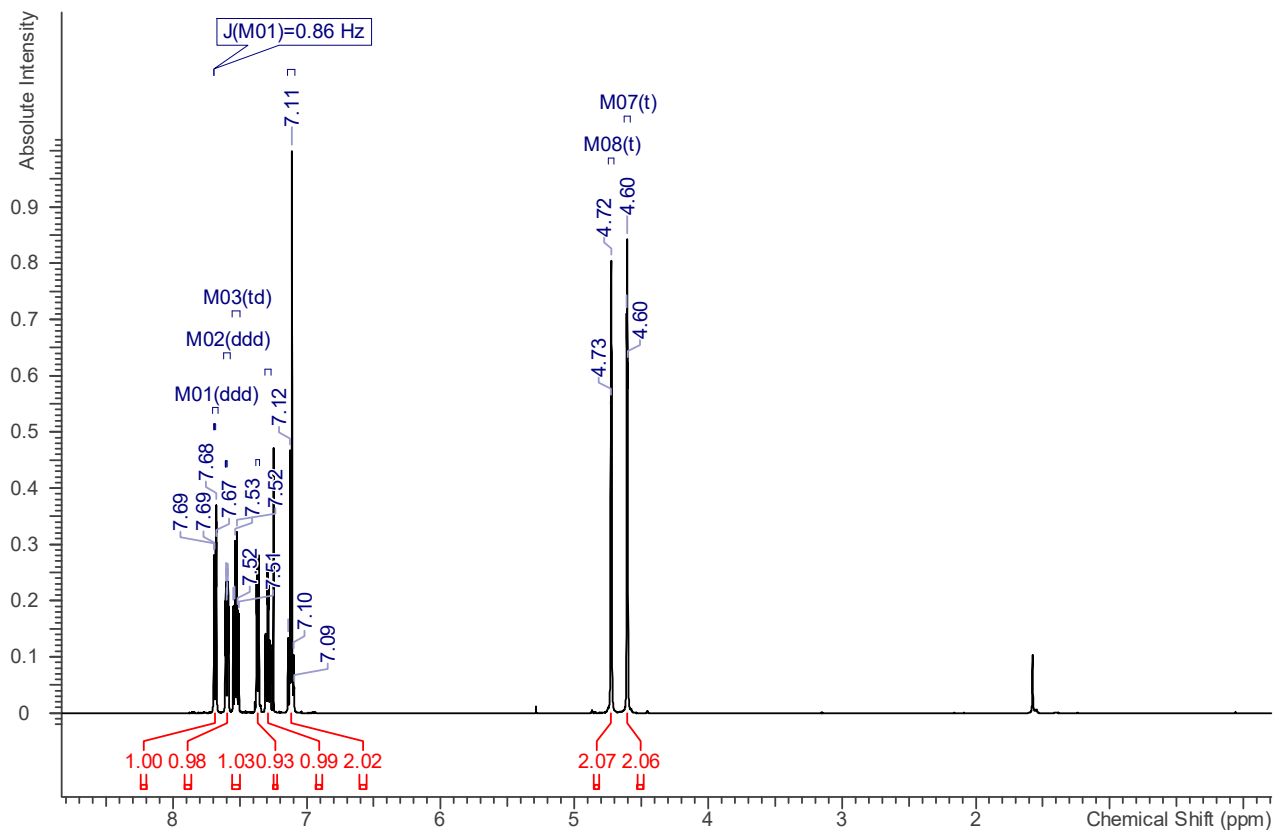

<sup>13</sup>C-NMR (126 MHz, CDCl<sub>3</sub>)

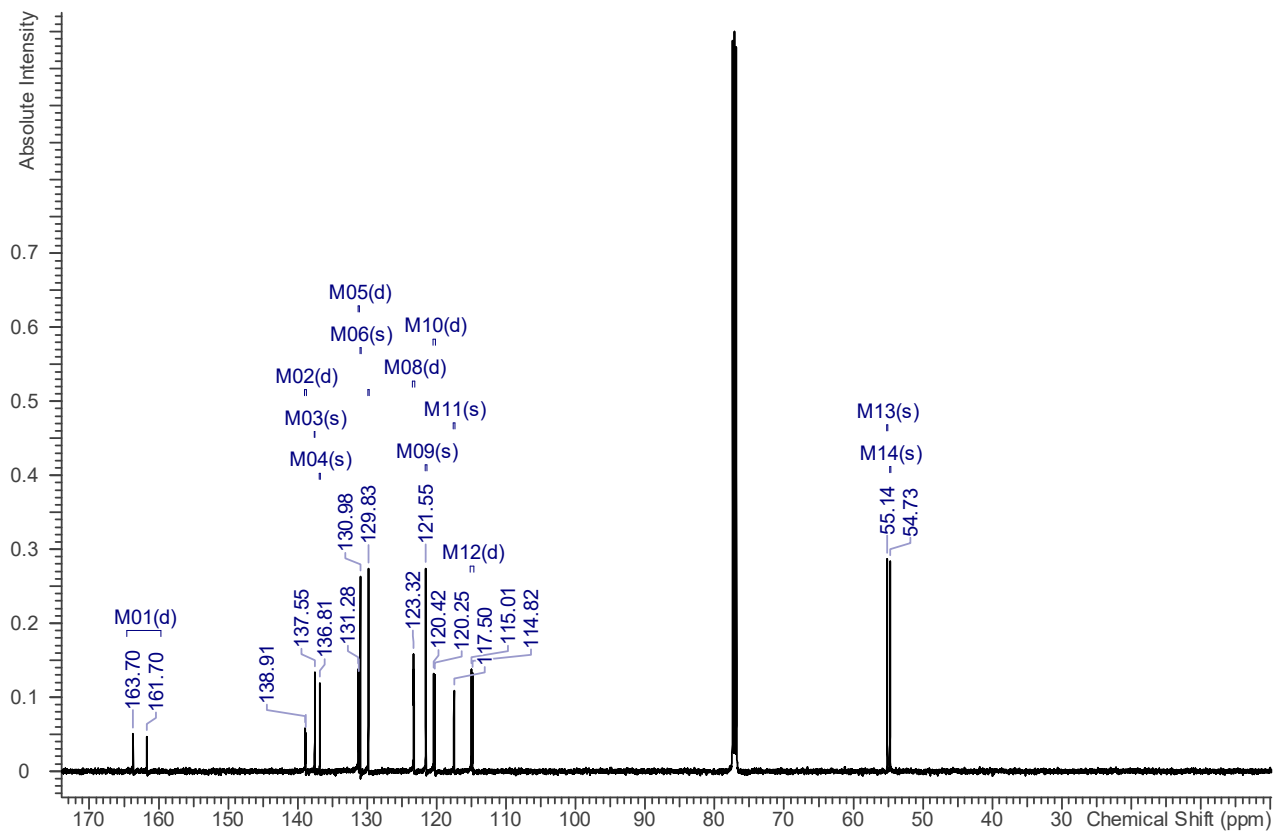

### 2.8. 5-Bromo-2-[(3-fluorophenyl)sulfonyl]isoindoline **2h**

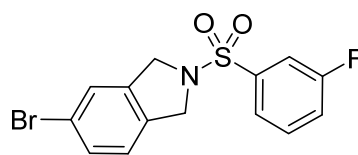

UPLC/MS

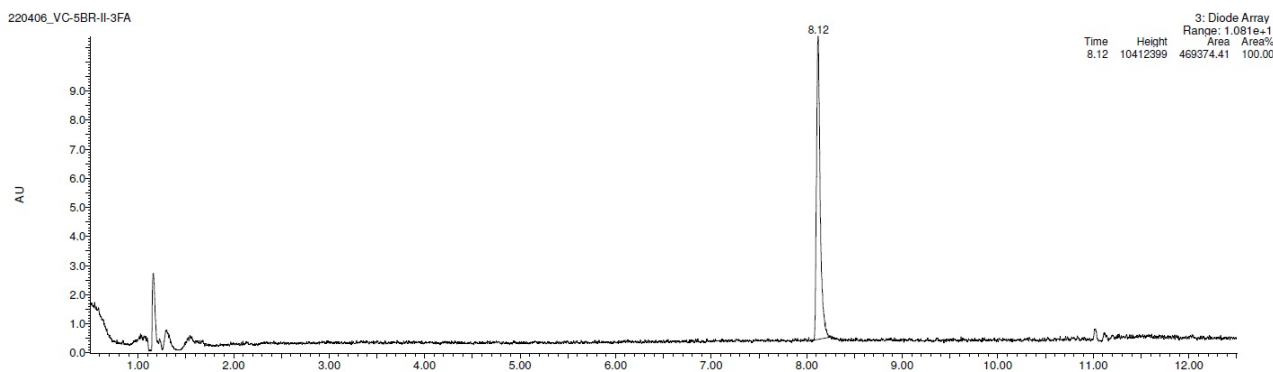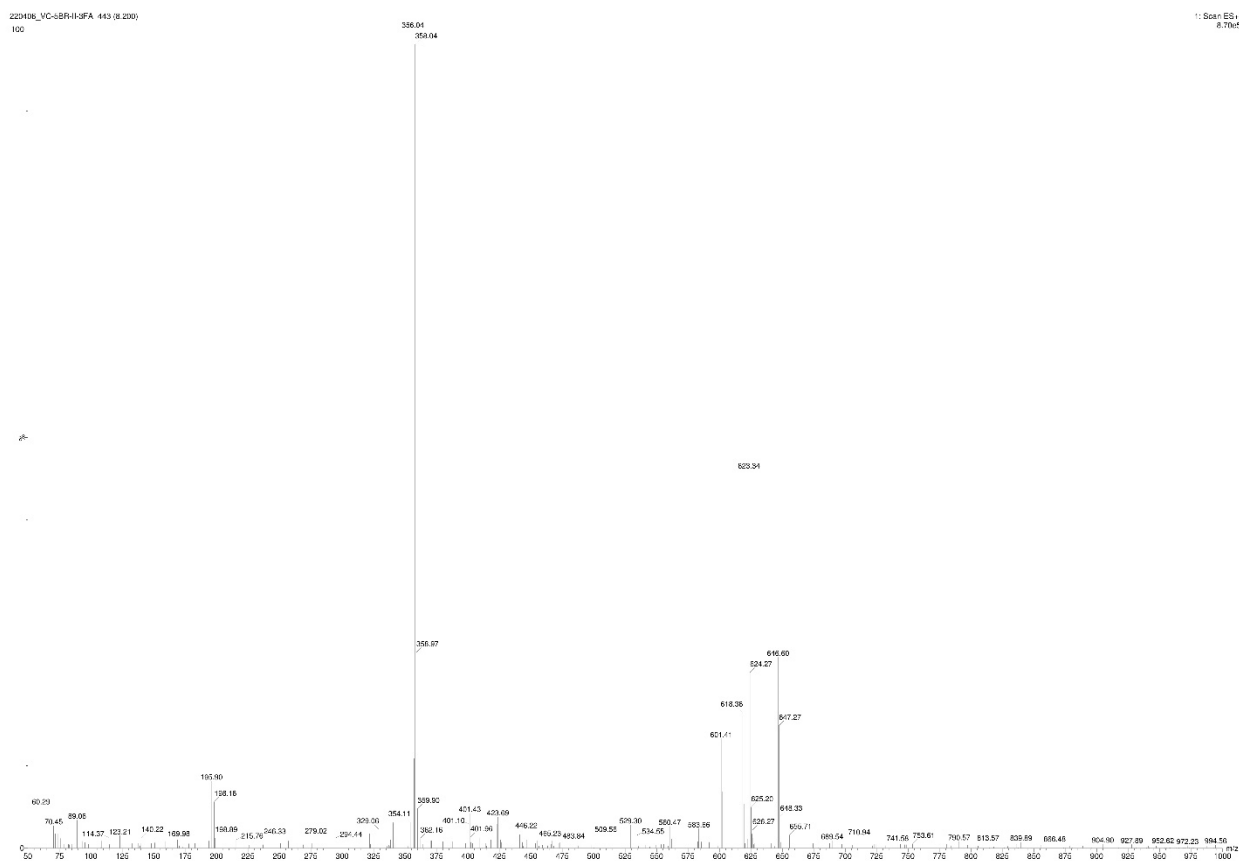

$^1\text{H}$ -NMR (500 MHz,  $\text{CDCl}_3$ )

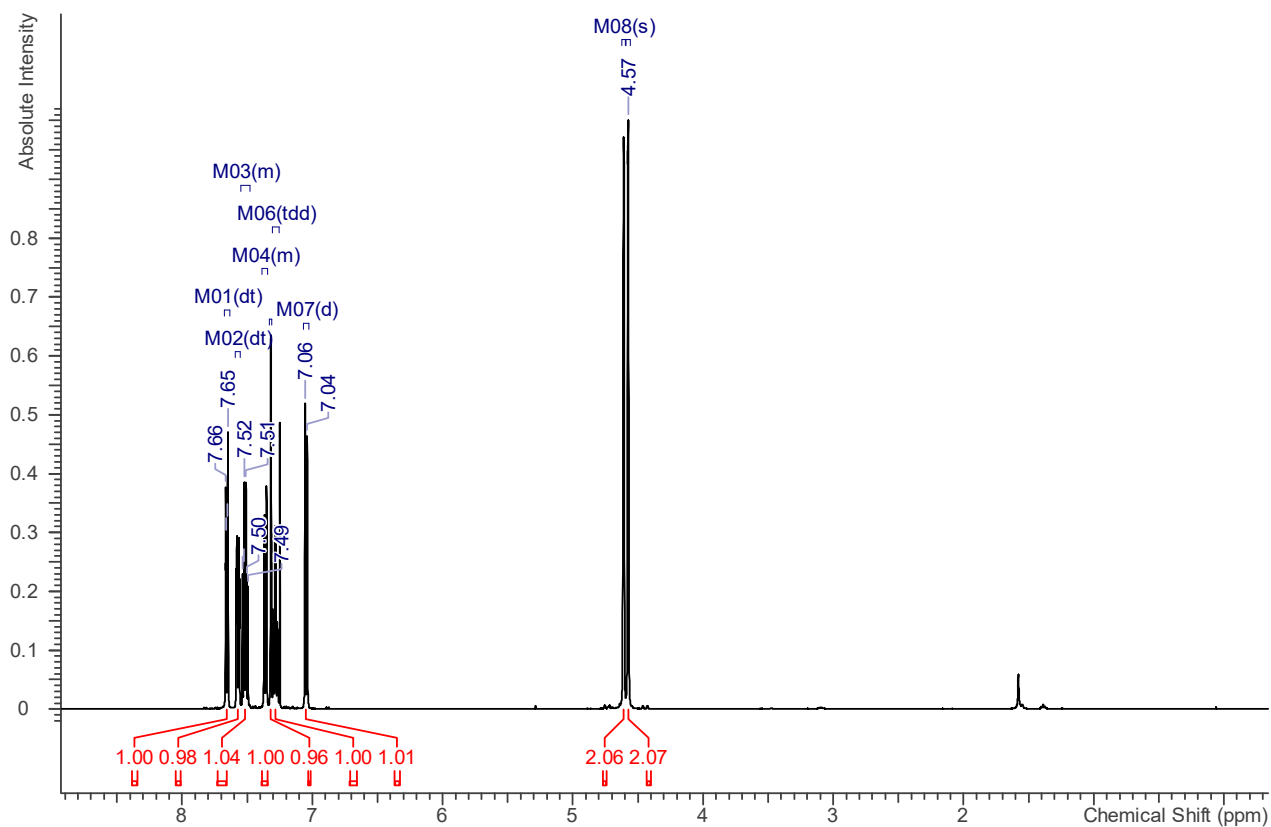

$^{13}\text{C}$ -NMR (126 MHz,  $\text{CDCl}_3$ )

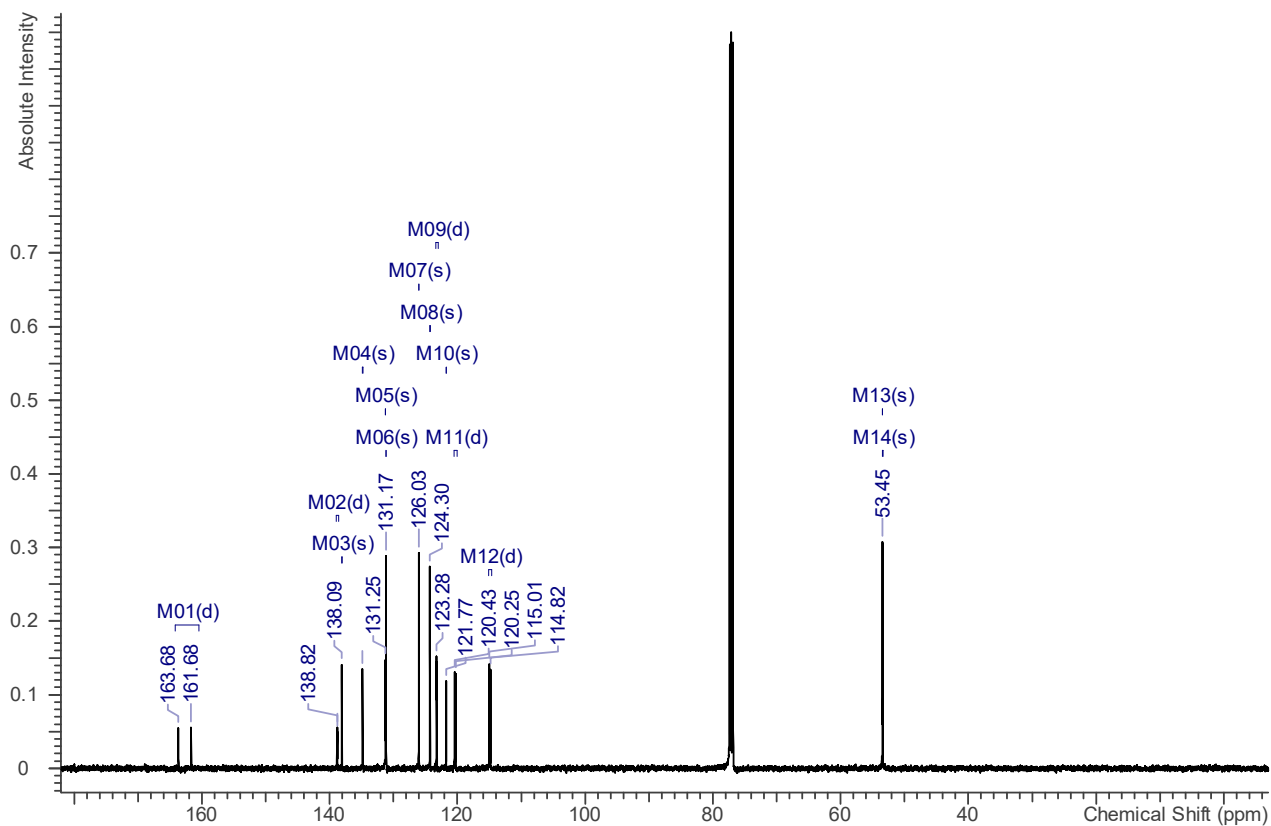

## 2.9. 2-[(2-Fluorophenyl)sulfonyl]isoindoline **2i**

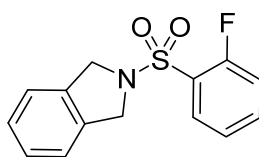

UPLC/MS

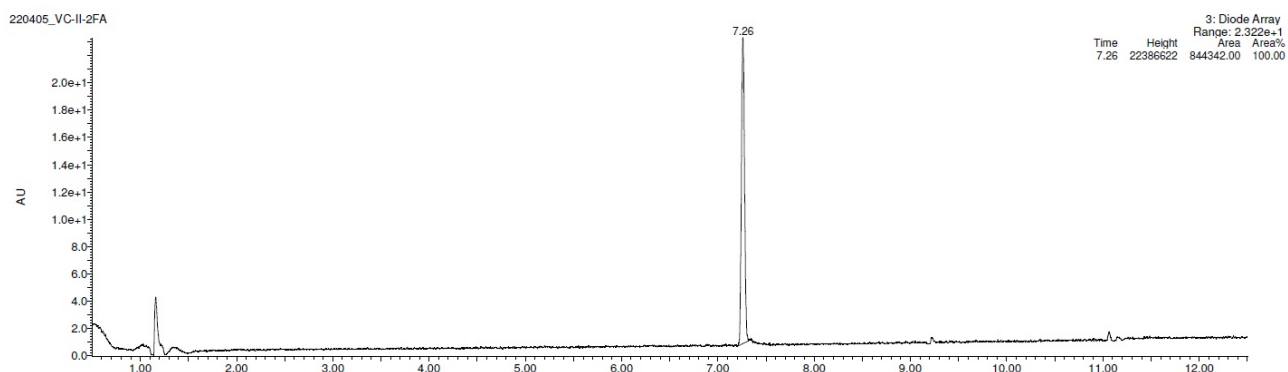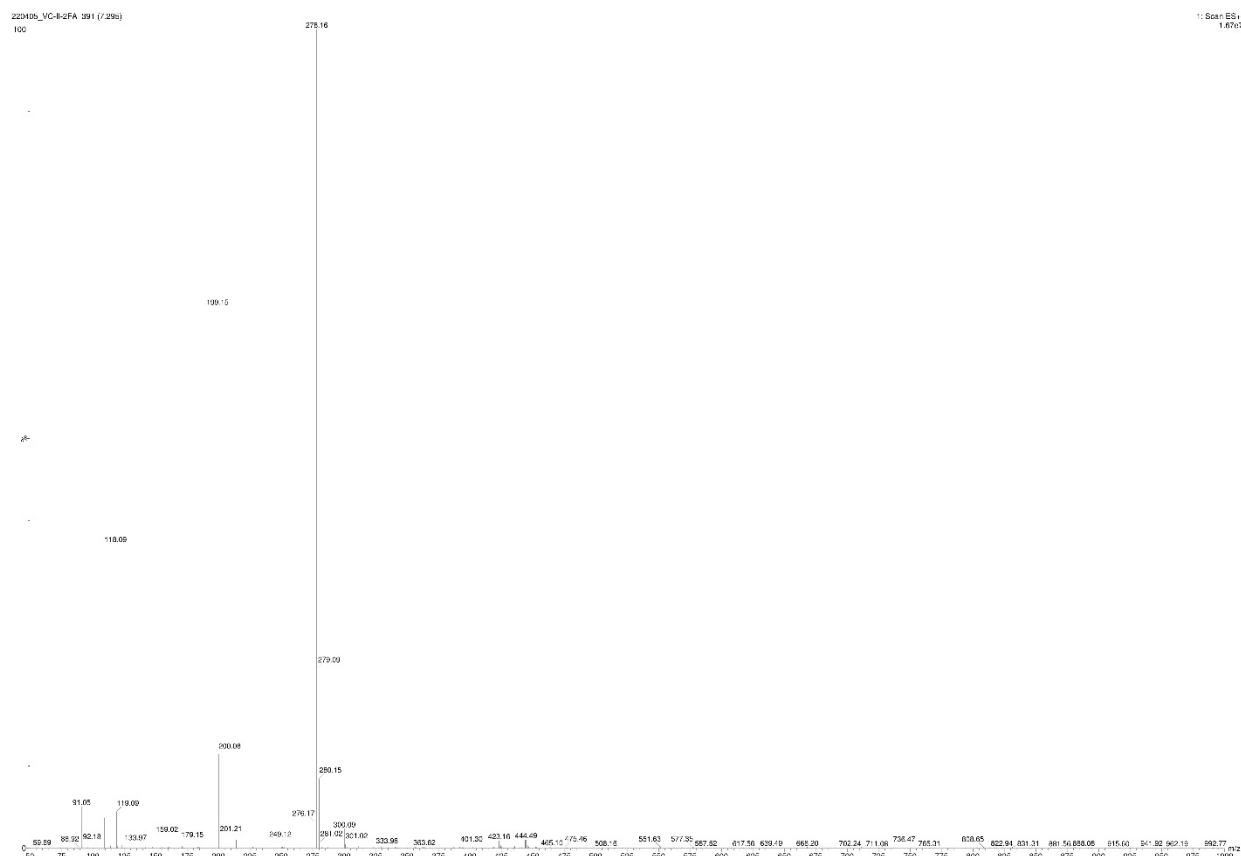

$^1\text{H}$ -NMR (500 MHz,  $\text{CDCl}_3$ )

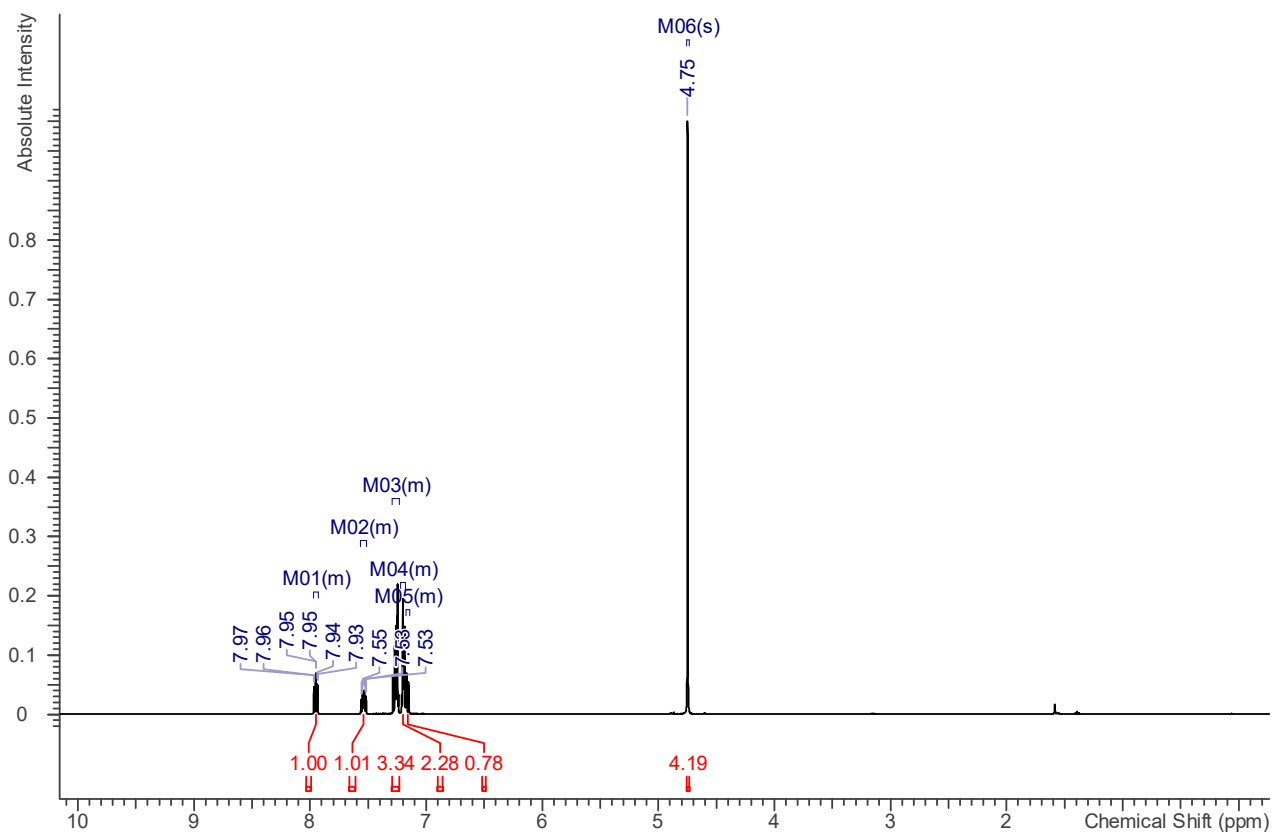

$^{13}\text{C}$ -NMR (126 MHz,  $\text{CDCl}_3$ )

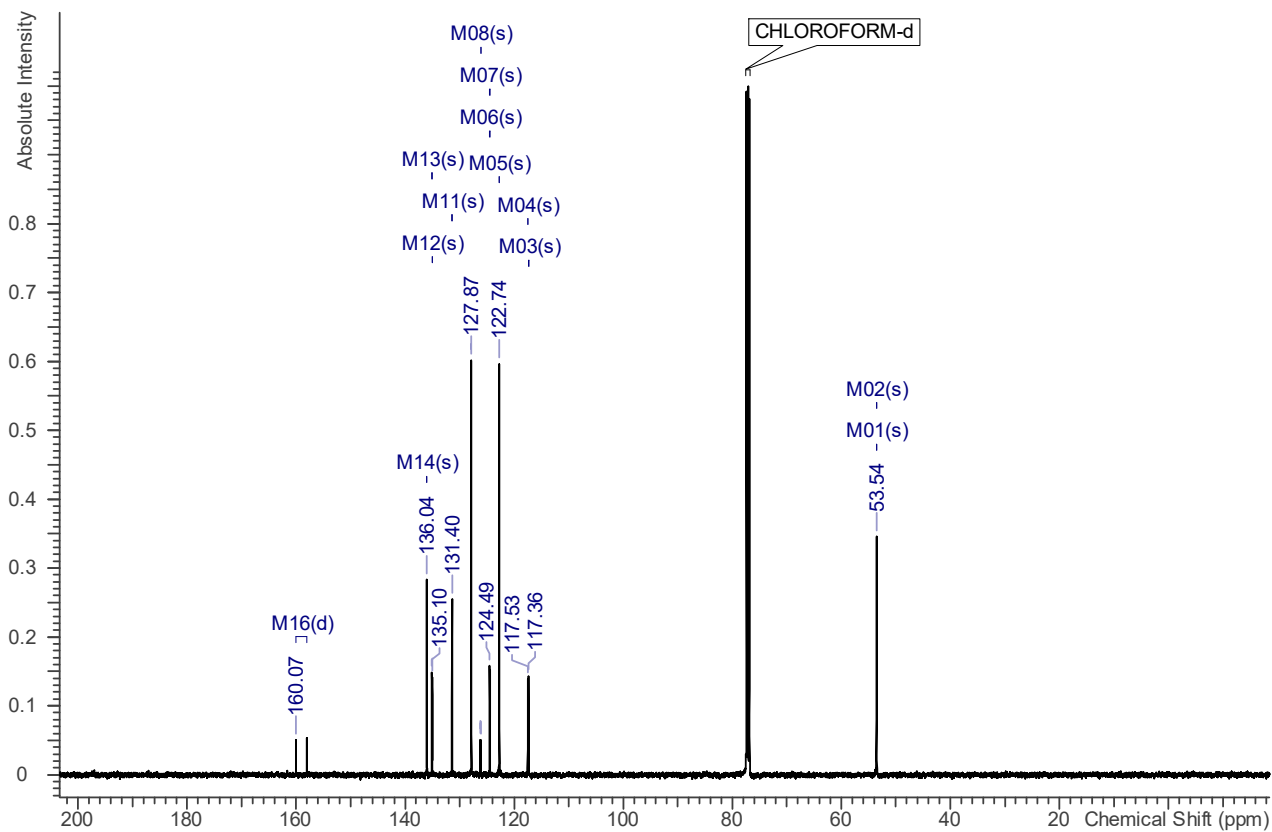



## 2.10. 4-Chloro-2-[(2-fluorophenyl)sulfonyl]isoindoline **2j**

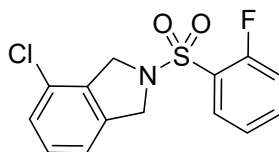

UPLC/MS

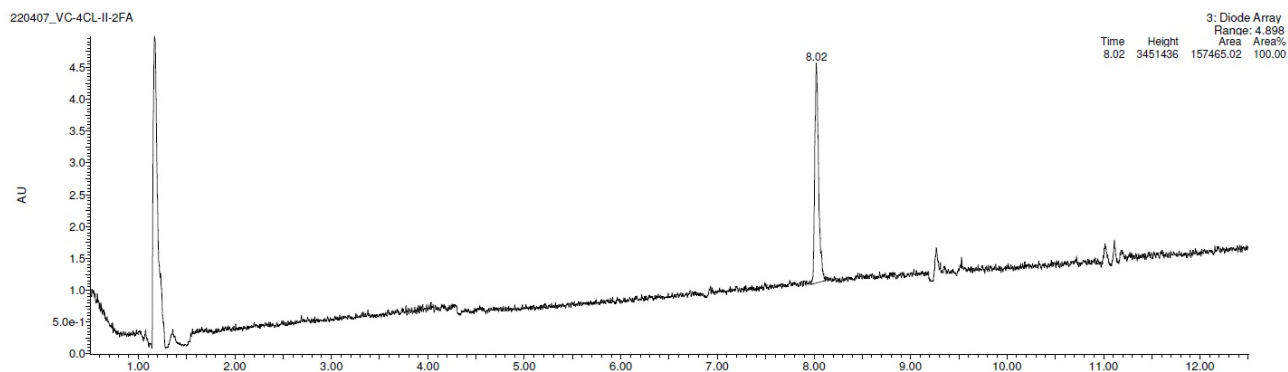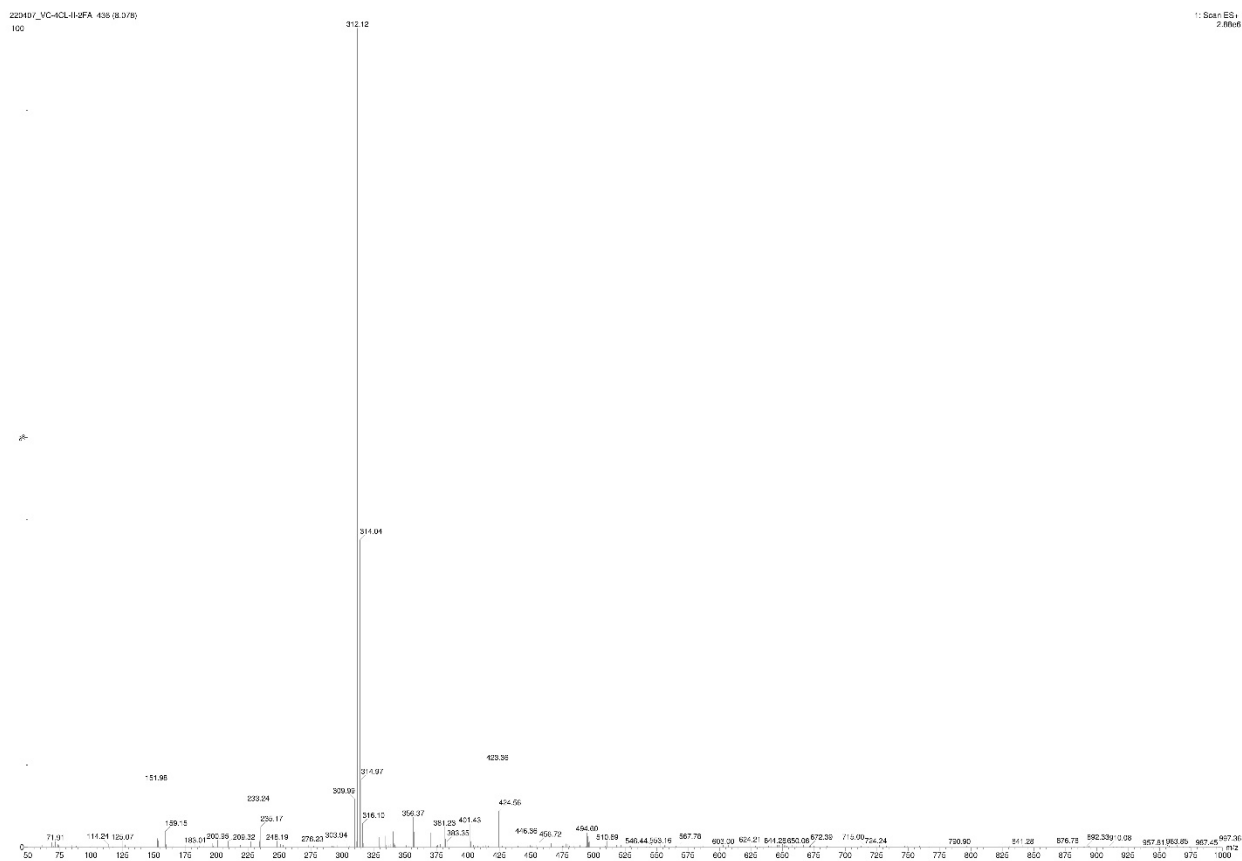

<sup>1</sup>H-NMR (500 MHz, CDCl<sub>3</sub>)

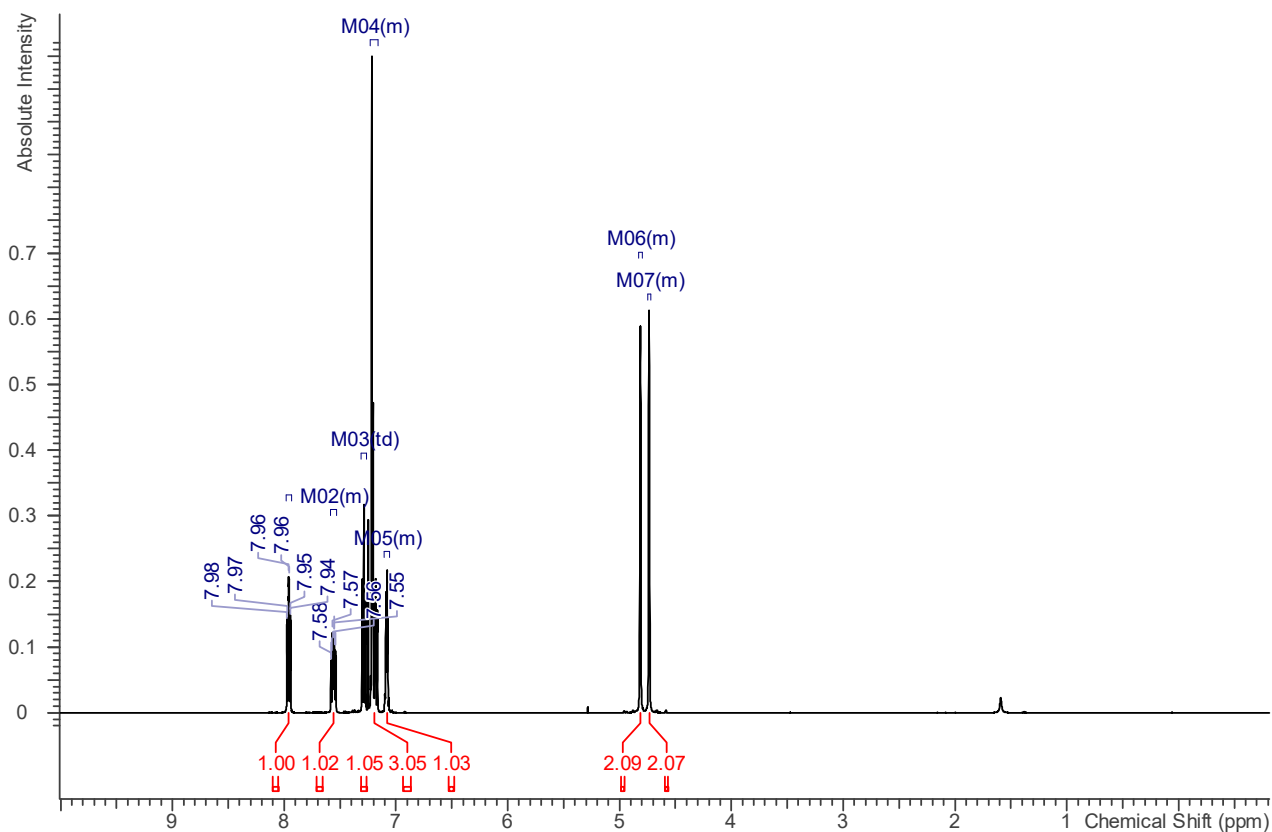

<sup>13</sup>C-NMR (126 MHz, CDCl<sub>3</sub>)

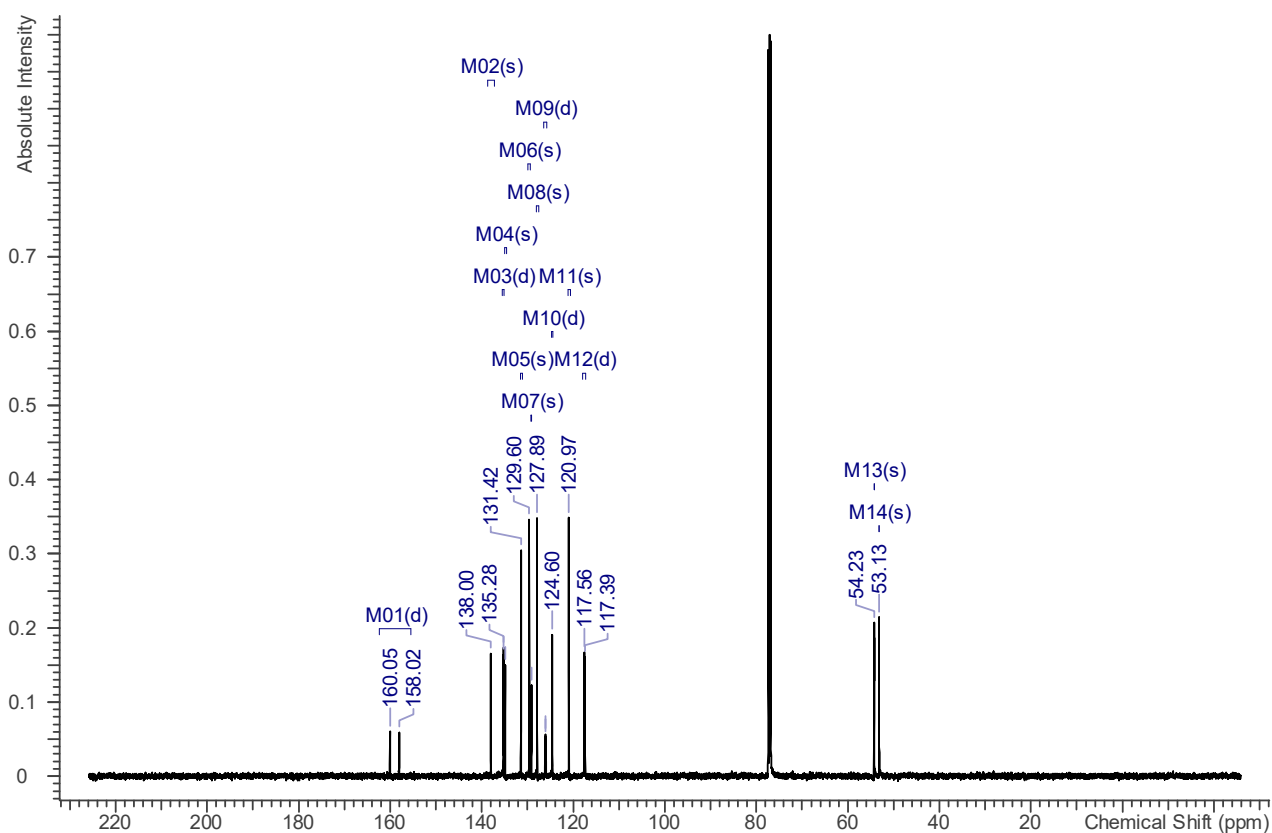

## 2.11. 4-Bromo-2-[(2-fluorophenyl)sulfonyl]isoindoline **2k**

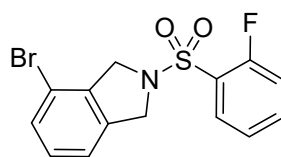

UPLC/MS

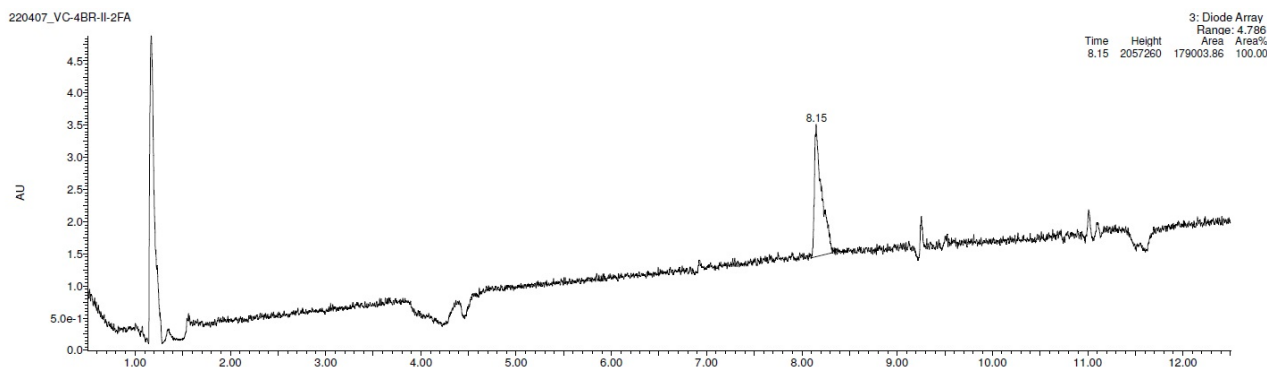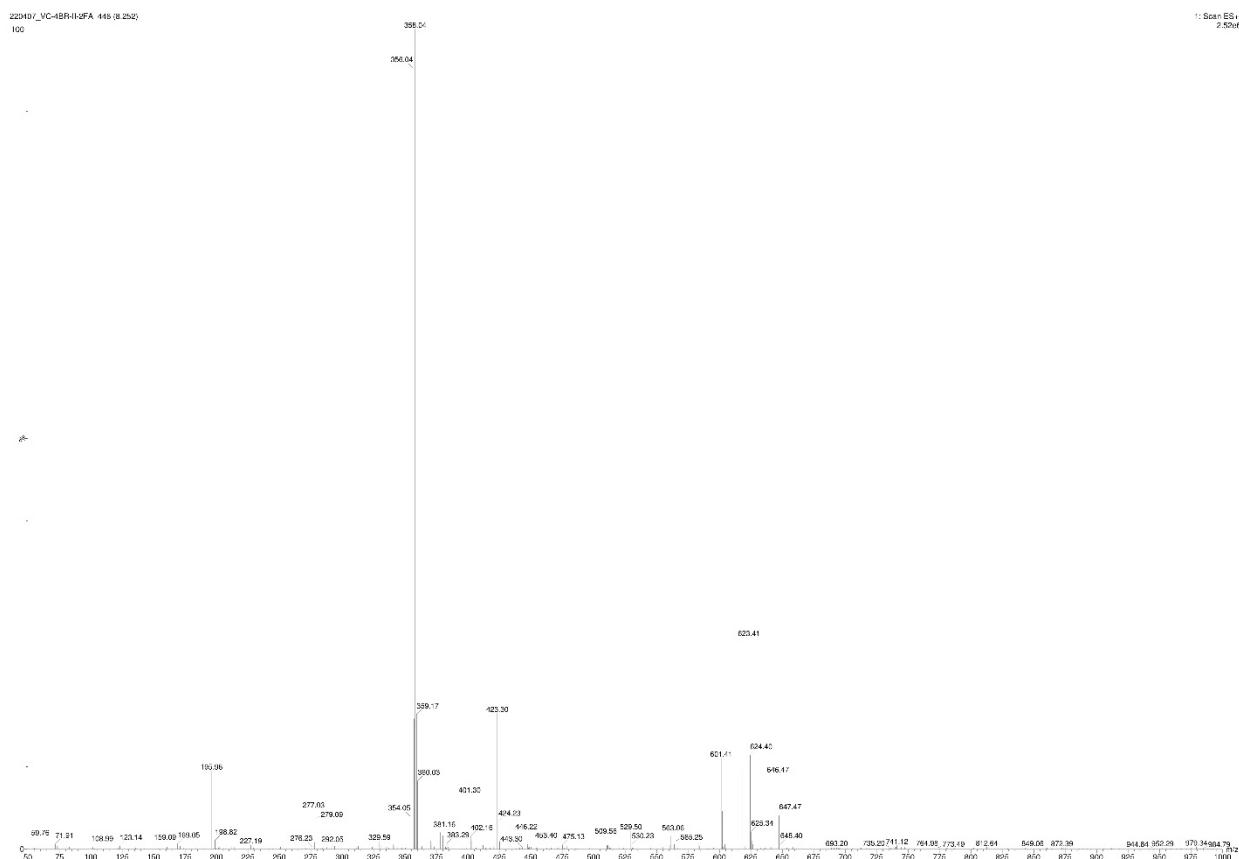

$^1\text{H}$ -NMR (500 MHz,  $\text{CDCl}_3$ )

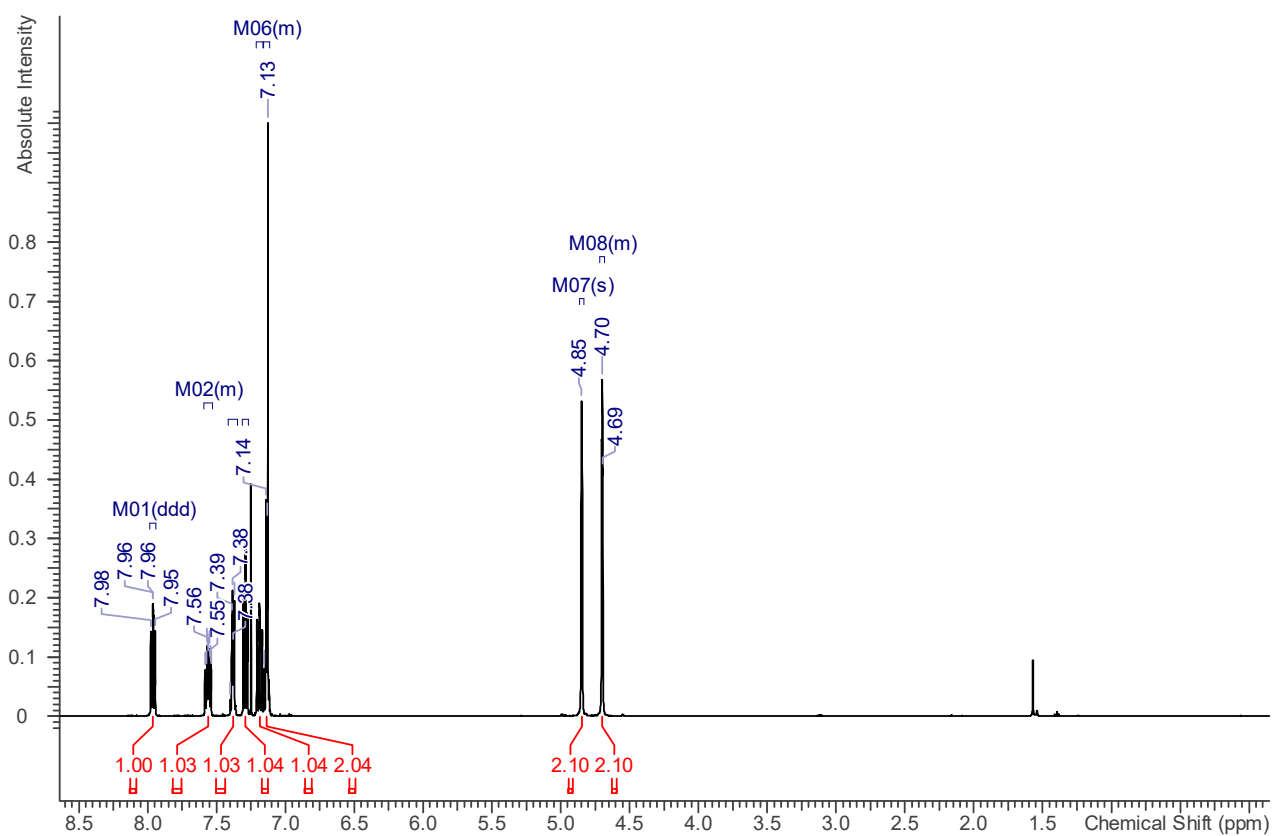

$^{13}\text{C}$ -NMR (126 MHz,  $\text{CDCl}_3$ )

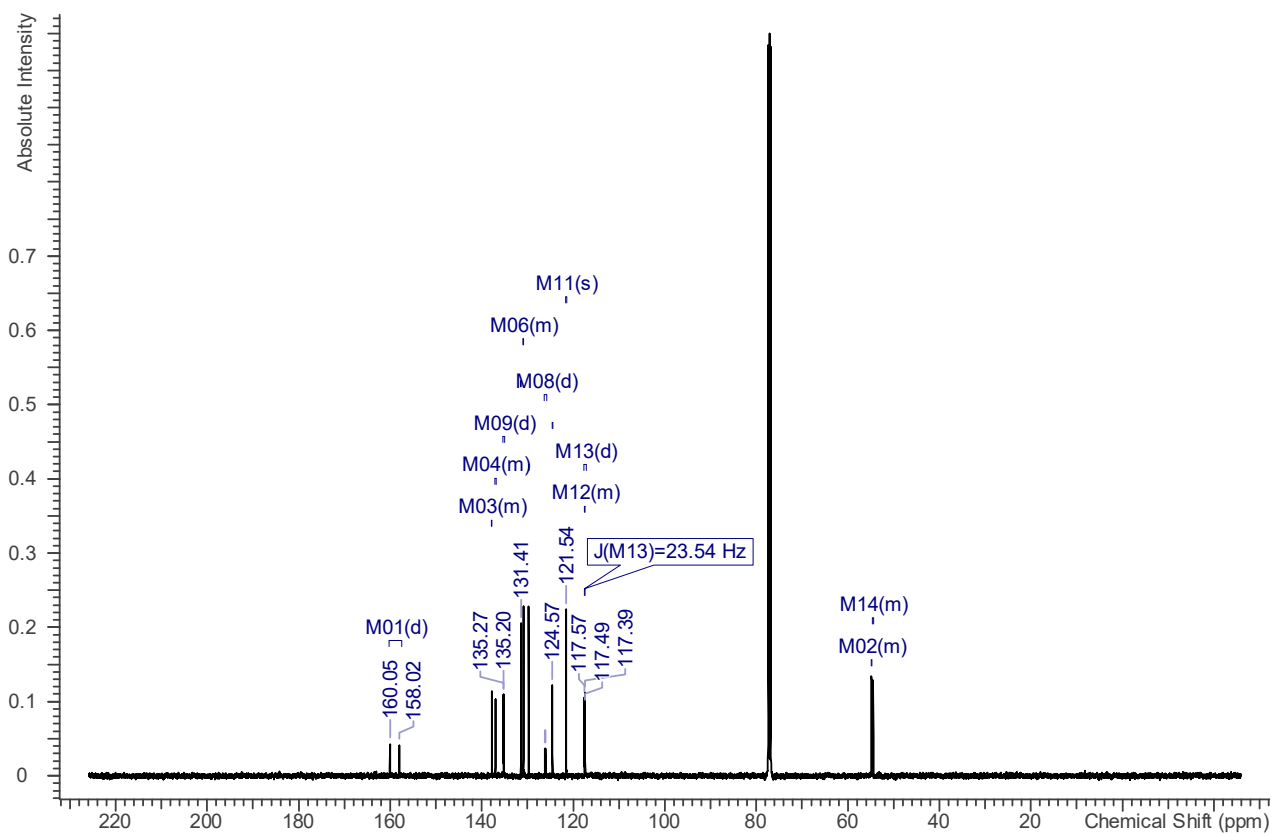

## 2.12. 5-Bromo-2-[(2-fluorophenyl)sulfonyl]isoindoline **21**

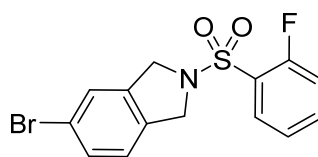

### UPLC/MS

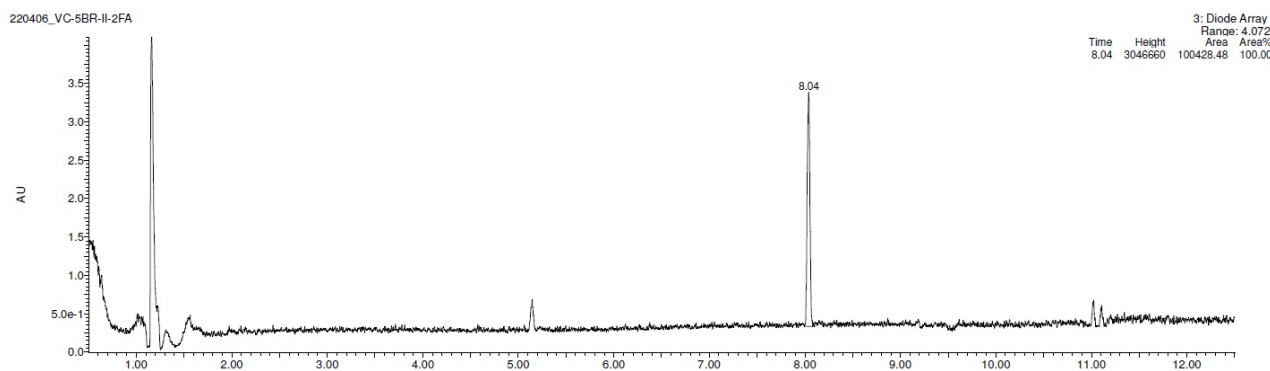

220406\_VC-5BR-II-2FA 435 (8.080) 100 338.10 1: Scan ES+ 2.30e6

266.04

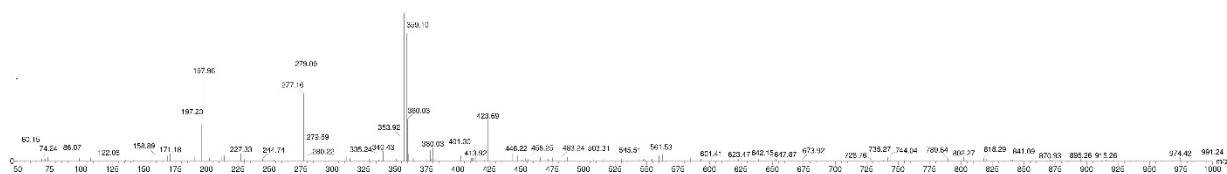

$^1\text{H}$ -NMR (500 MHz,  $\text{CDCl}_3$ )

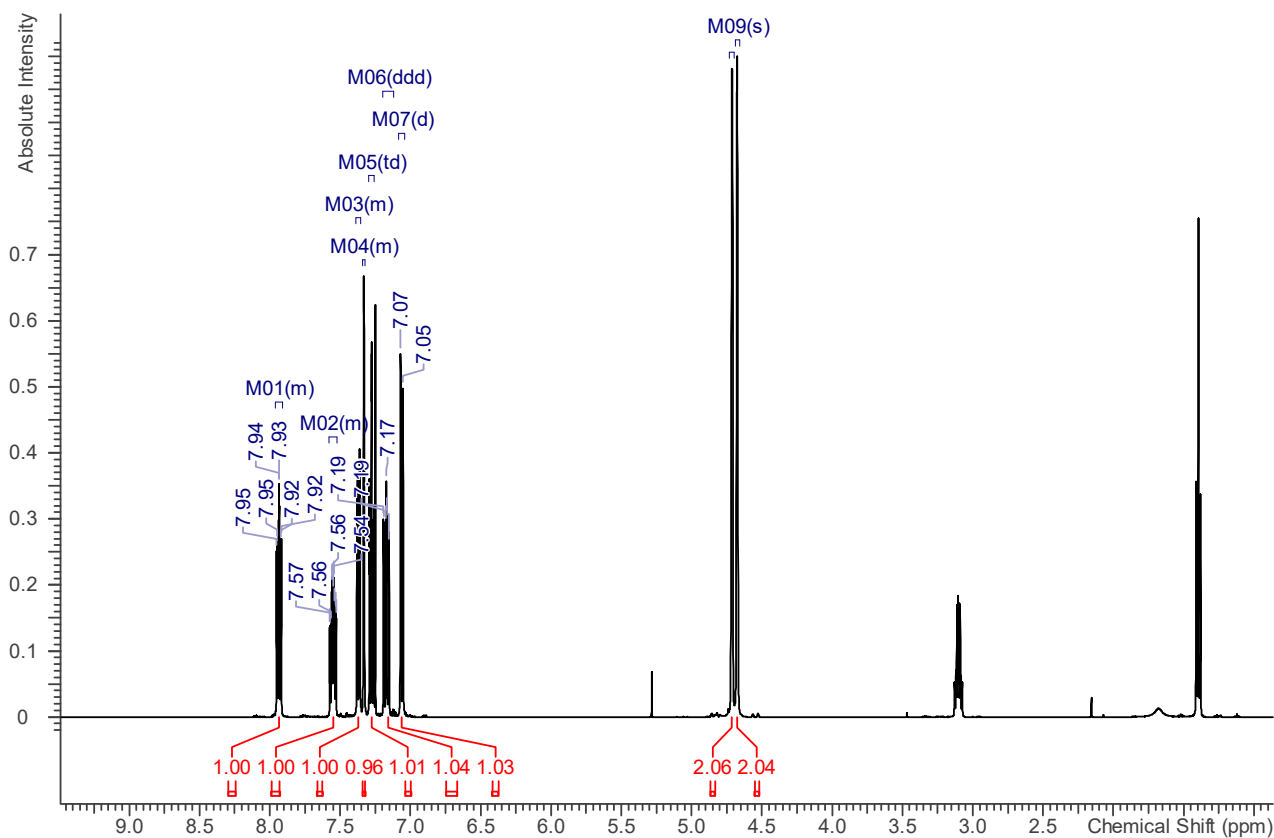

$^{13}\text{C}$ -NMR (126 MHz,  $\text{CDCl}_3$ )

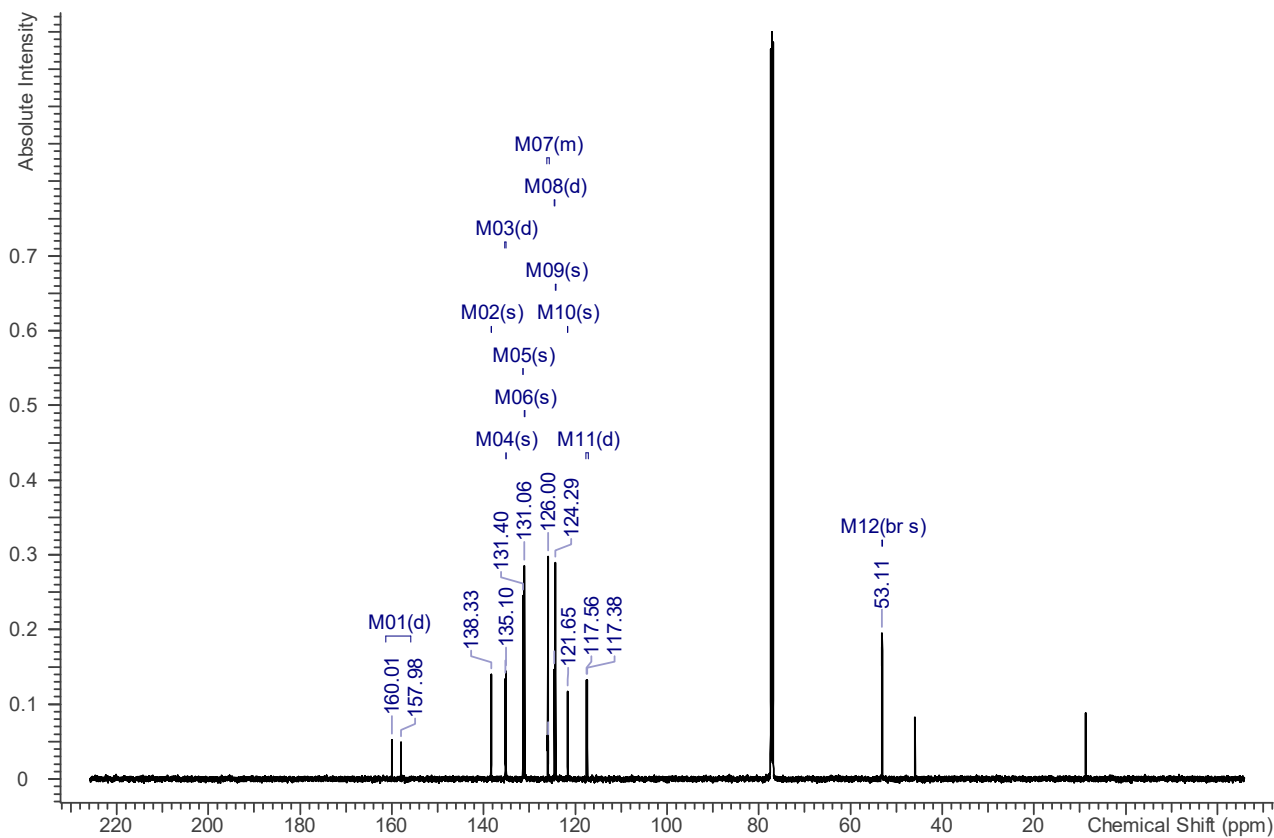

### 3. UPLC/MS, $^1\text{H}$ NMR and $^{13}\text{C}$ NMR spectra of final compounds 3a–l

#### 3.1. 2- $\{[4-(\text{Piperazin-1-yl})\text{phenyl}]\text{sulfonyl}\}$ isoindoline **3a**

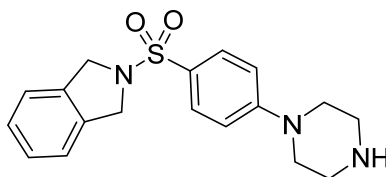

#### UPLC/MS

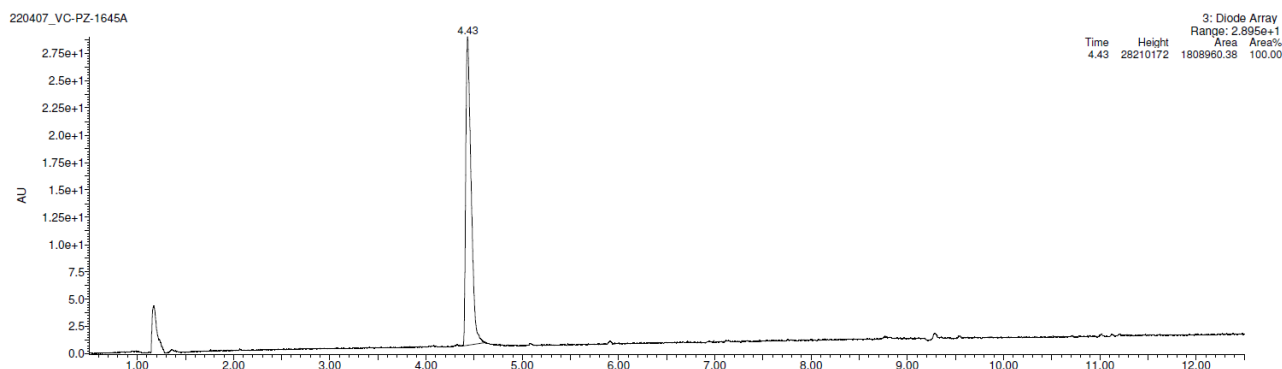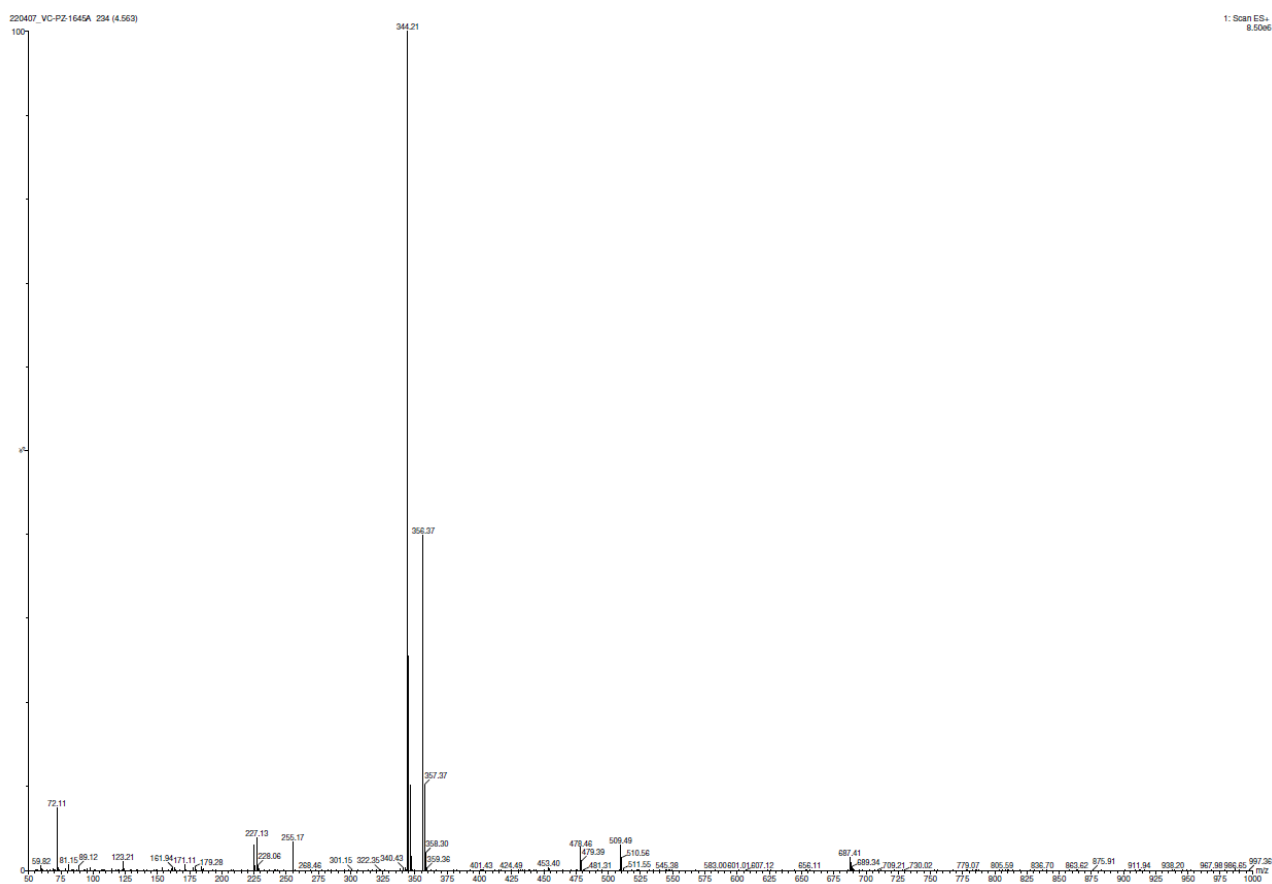

#### $^1\text{H}$ -NMR (500 MHz, $\text{CDCl}_3$ )

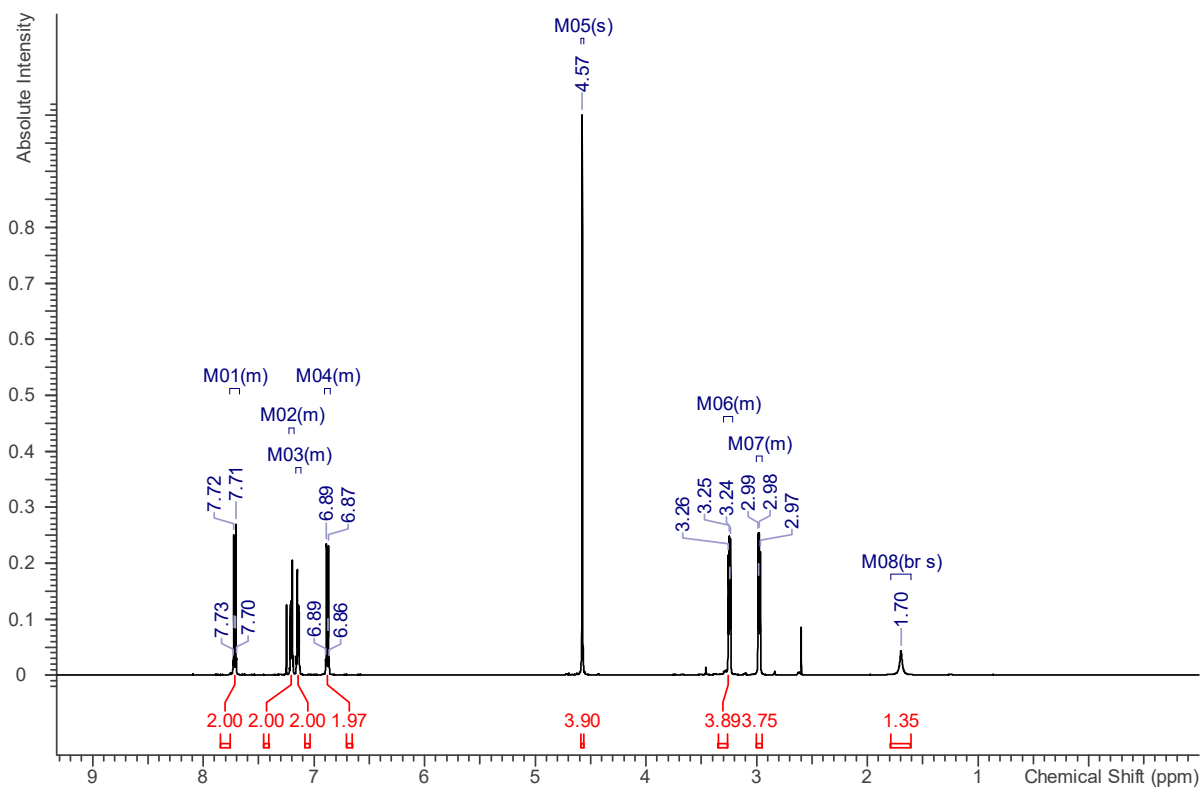

<sup>13</sup>C-NMR (126 MHz, DMSO-*d*<sub>6</sub>)

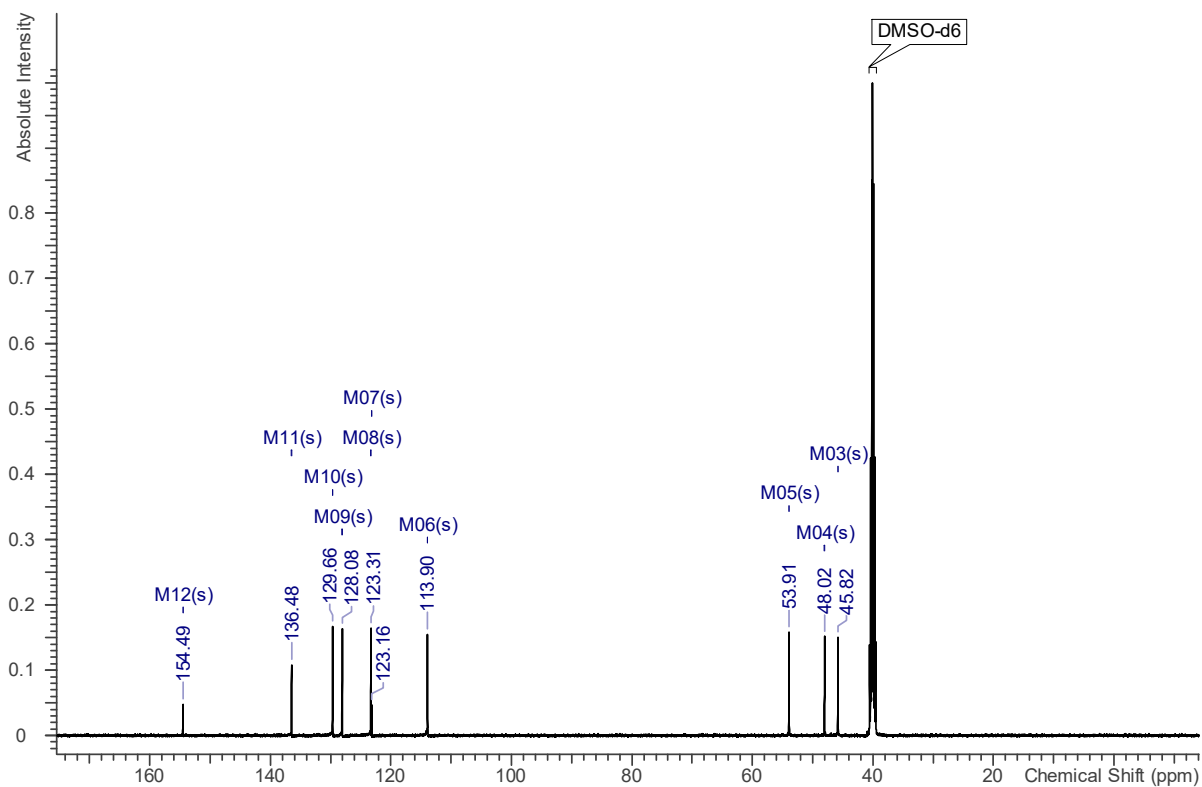



### 3.2. 4-Chloro-2-{[4-(piperazin-1-yl)phenyl]sulfonyl}isoindoline **3b**

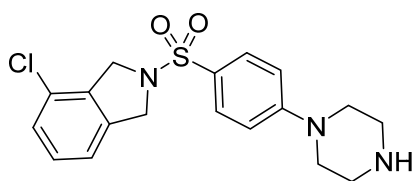

UPLC/MS

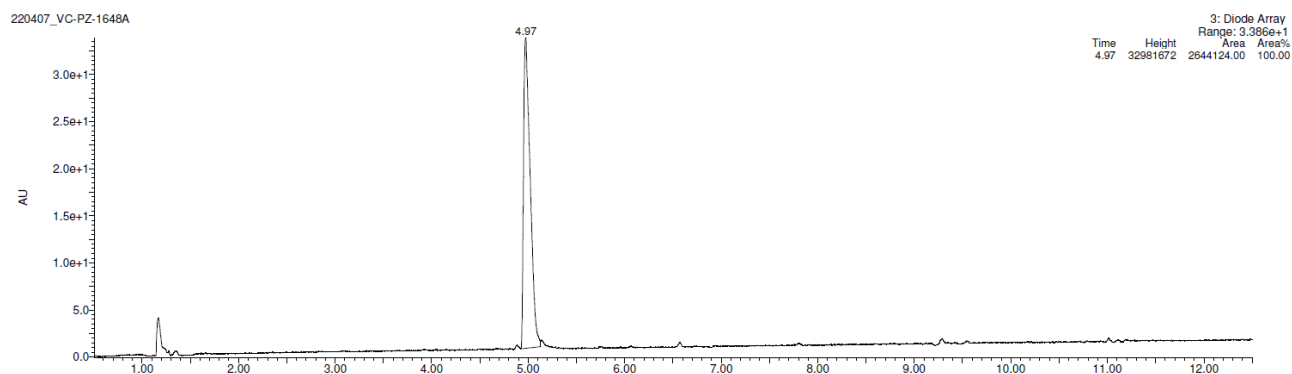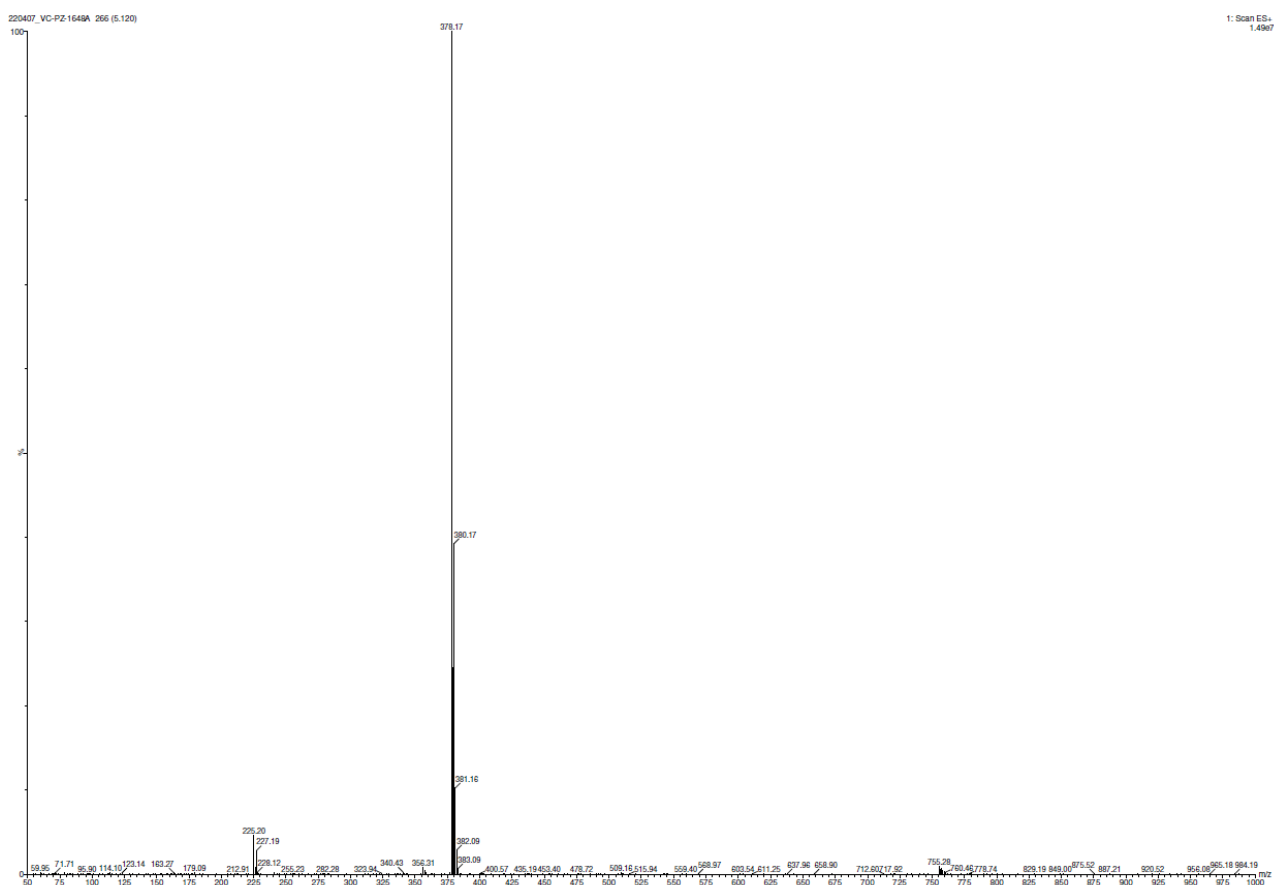

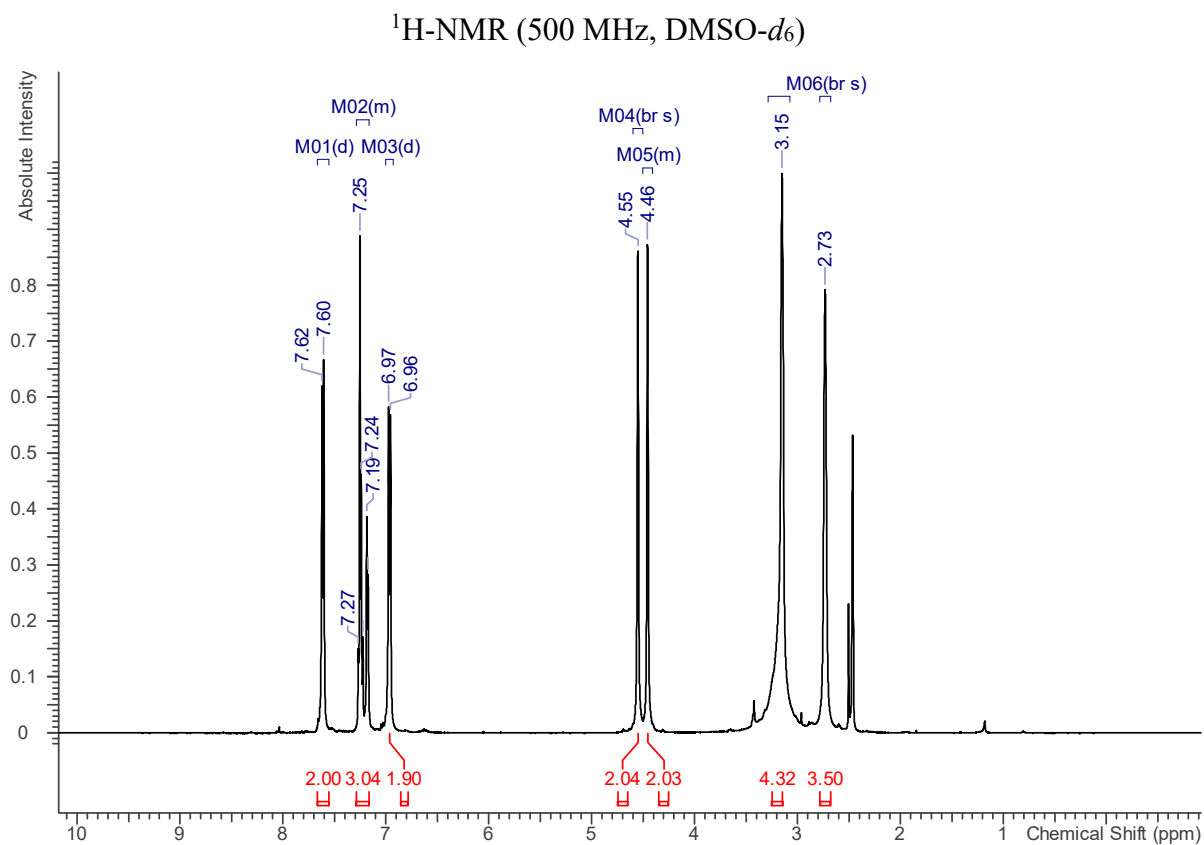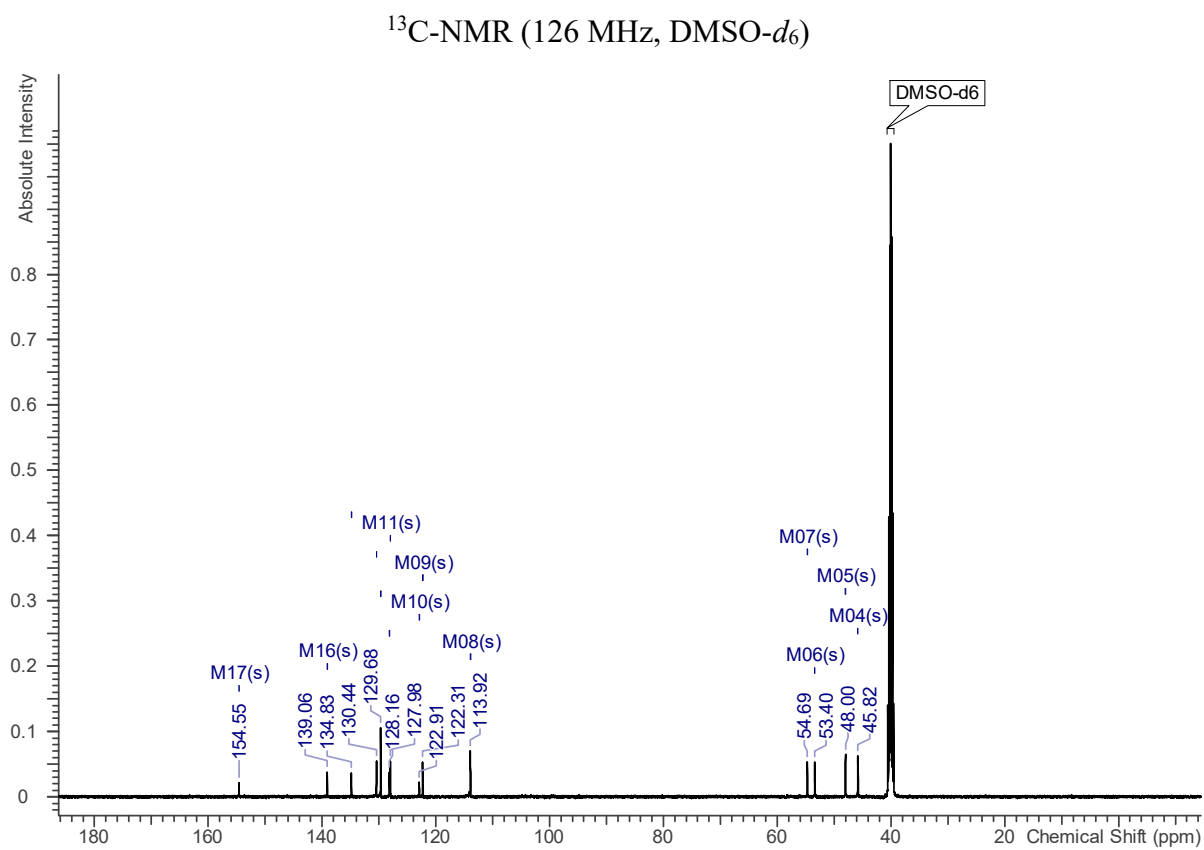

### 3.3. 4-Bromo-2-{[4-(piperazin-1-yl)phenyl]sulfonyl}isoindoline **3c**

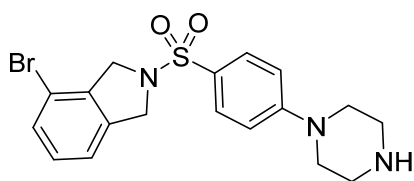

UPLC/MS

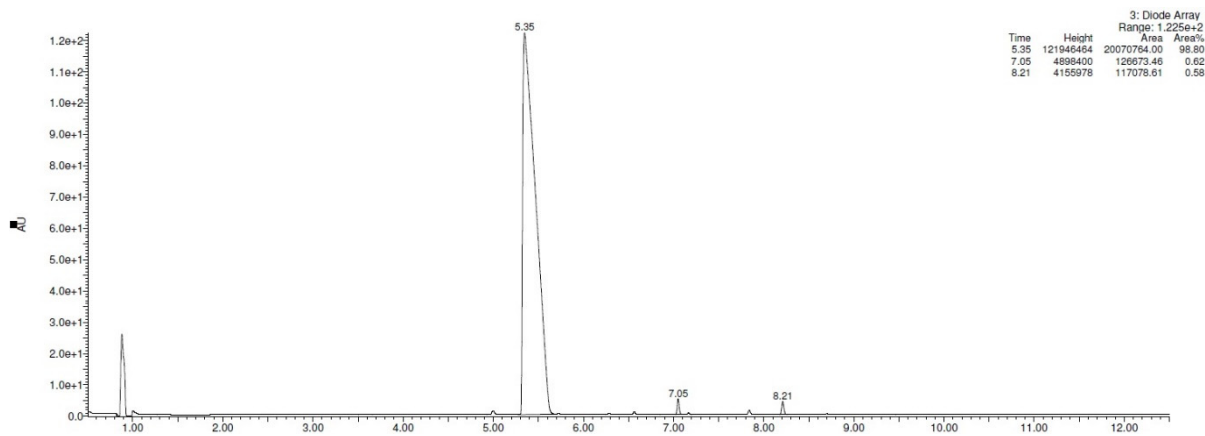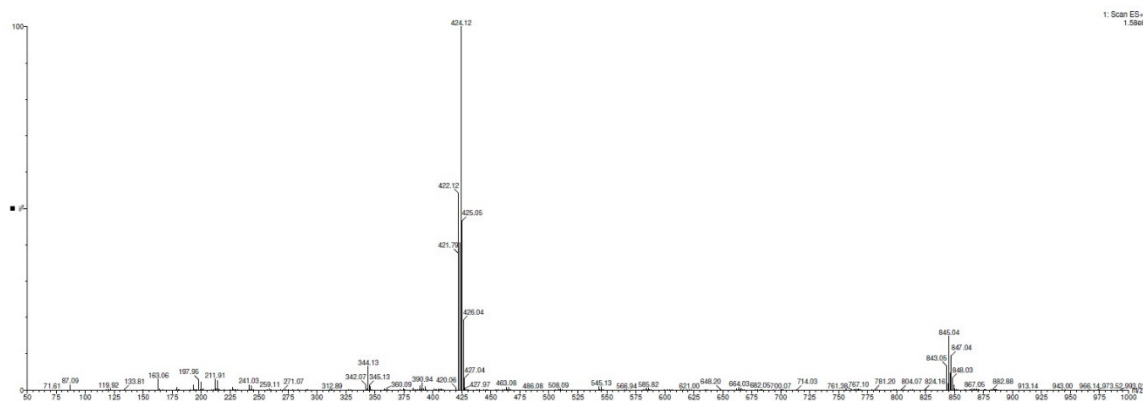

$^1\text{H}$ -NMR (500 MHz,  $\text{DMSO-}d_6$ )

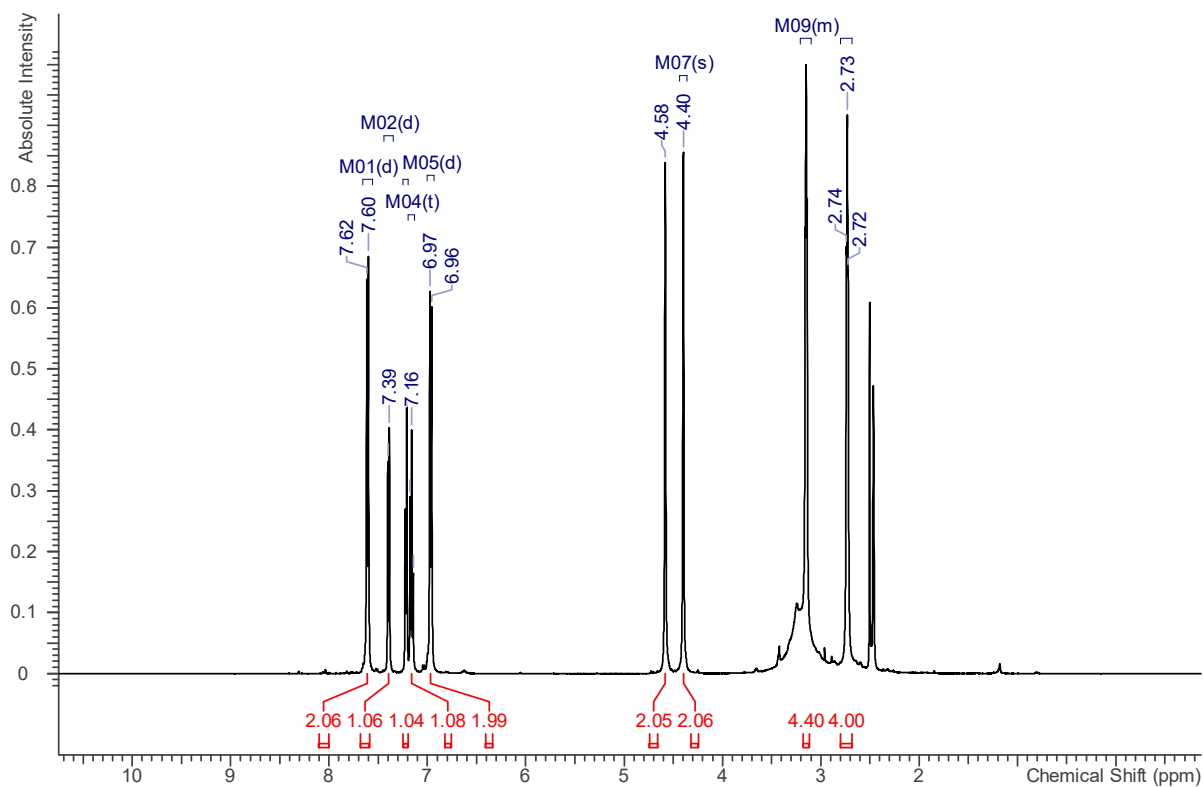

$^{13}\text{C}$ -NMR (126 MHz,  $\text{DMSO-}d_6$ )

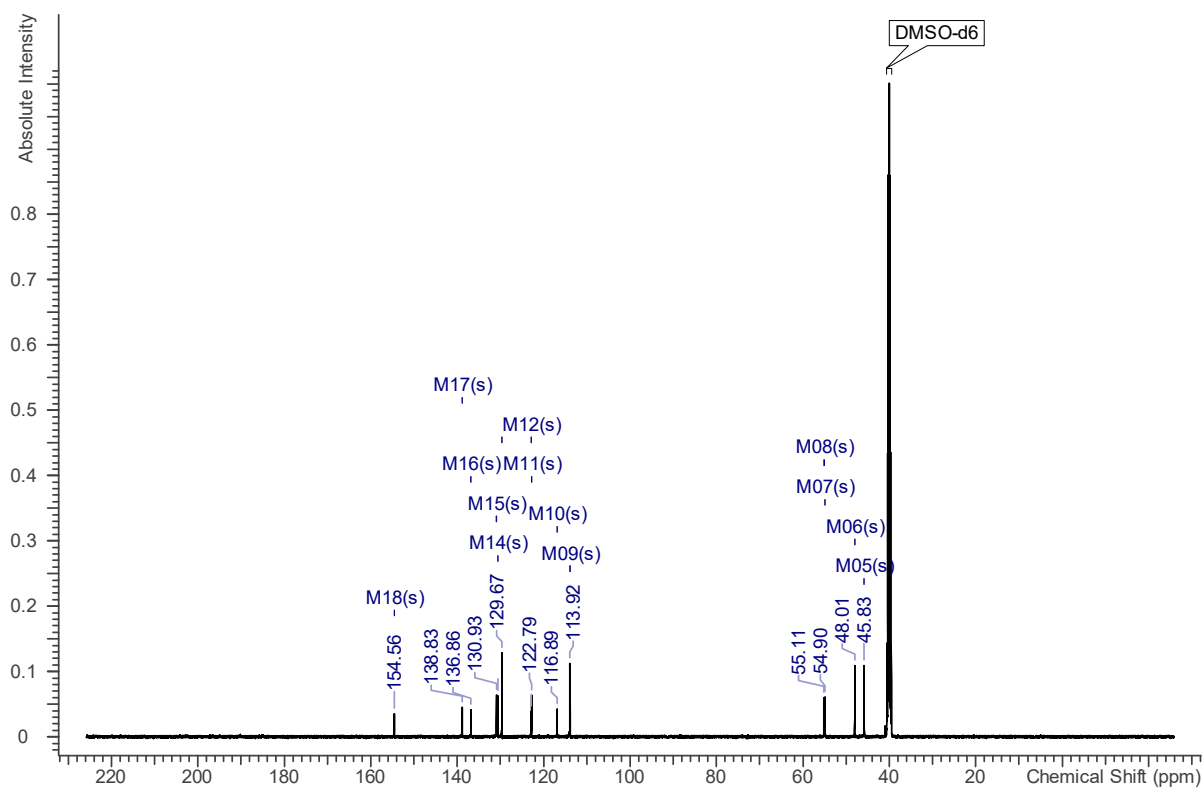

### 3.4. 5-Bromo-2-{[4-(piperazin-1-yl)phenyl]sulfonyl}isoindoline **3d**

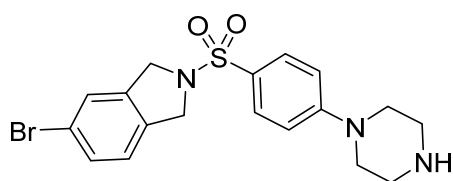

UPLC/MS

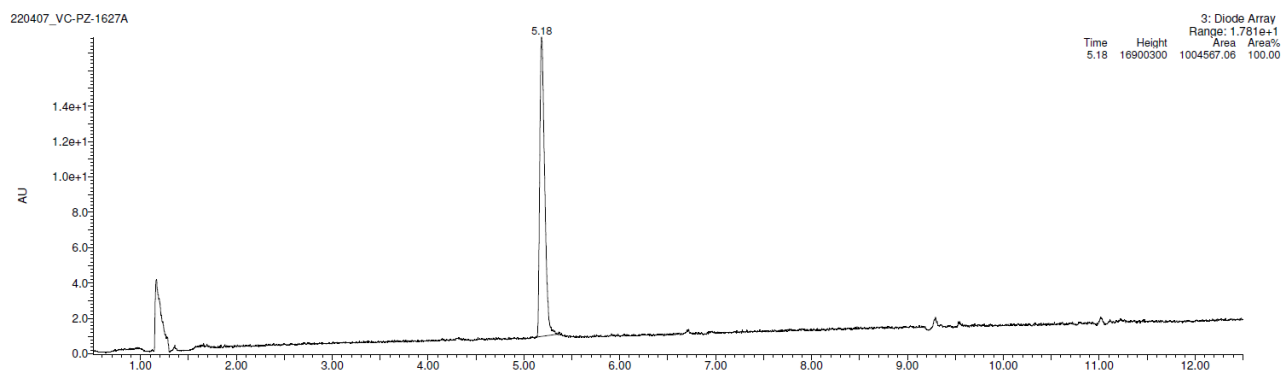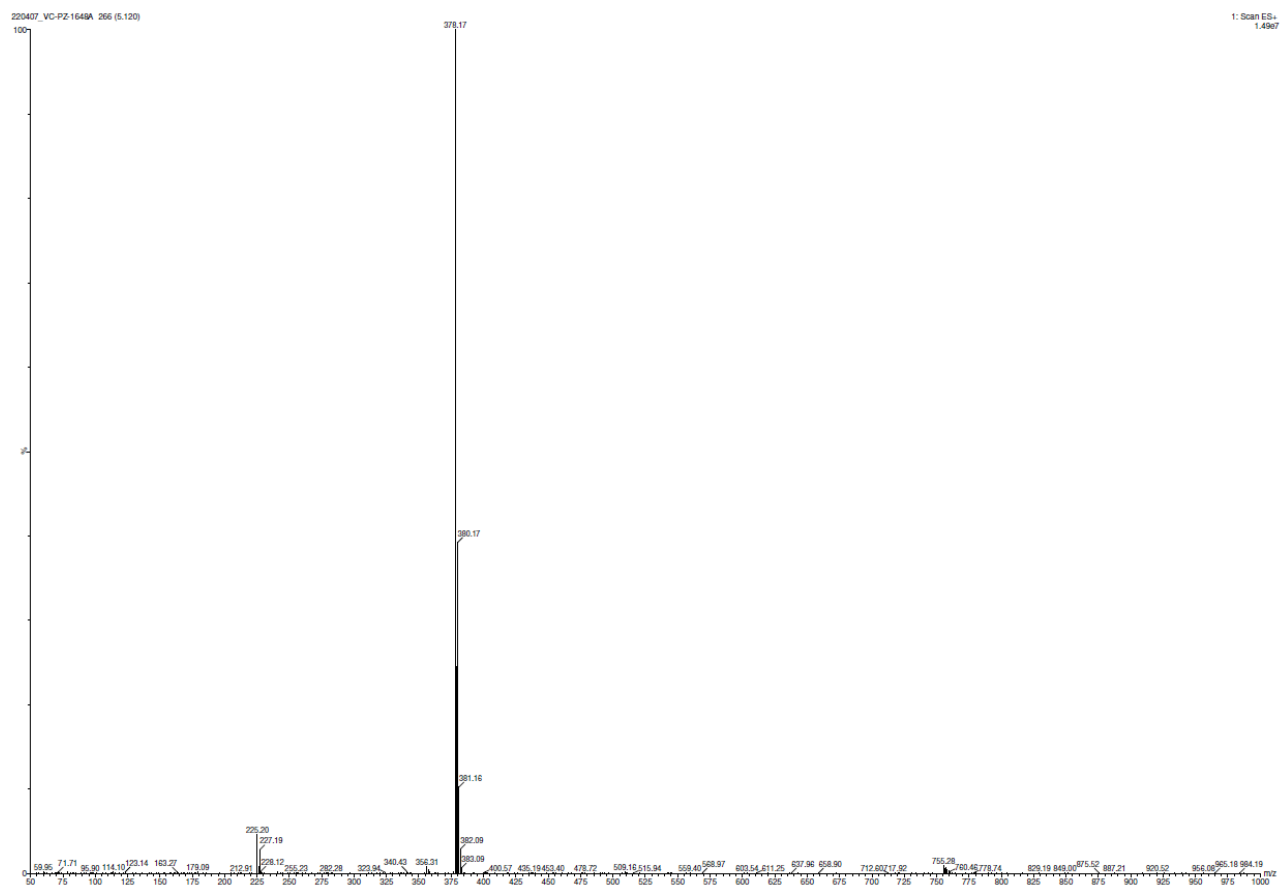

$^1\text{H}$ -NMR (500 MHz, DMSO- $d_6$ )

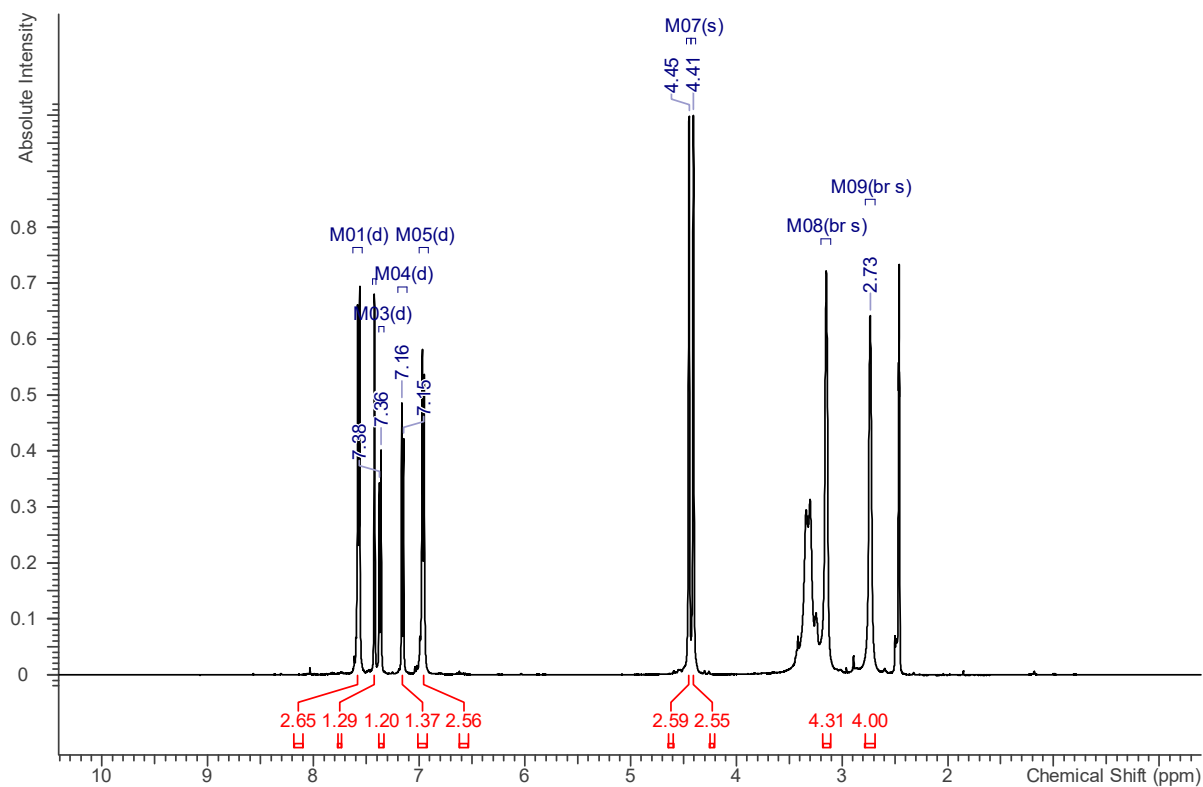

$^{13}\text{C}$ -NMR (126 MHz, DMSO- $d_6$ )

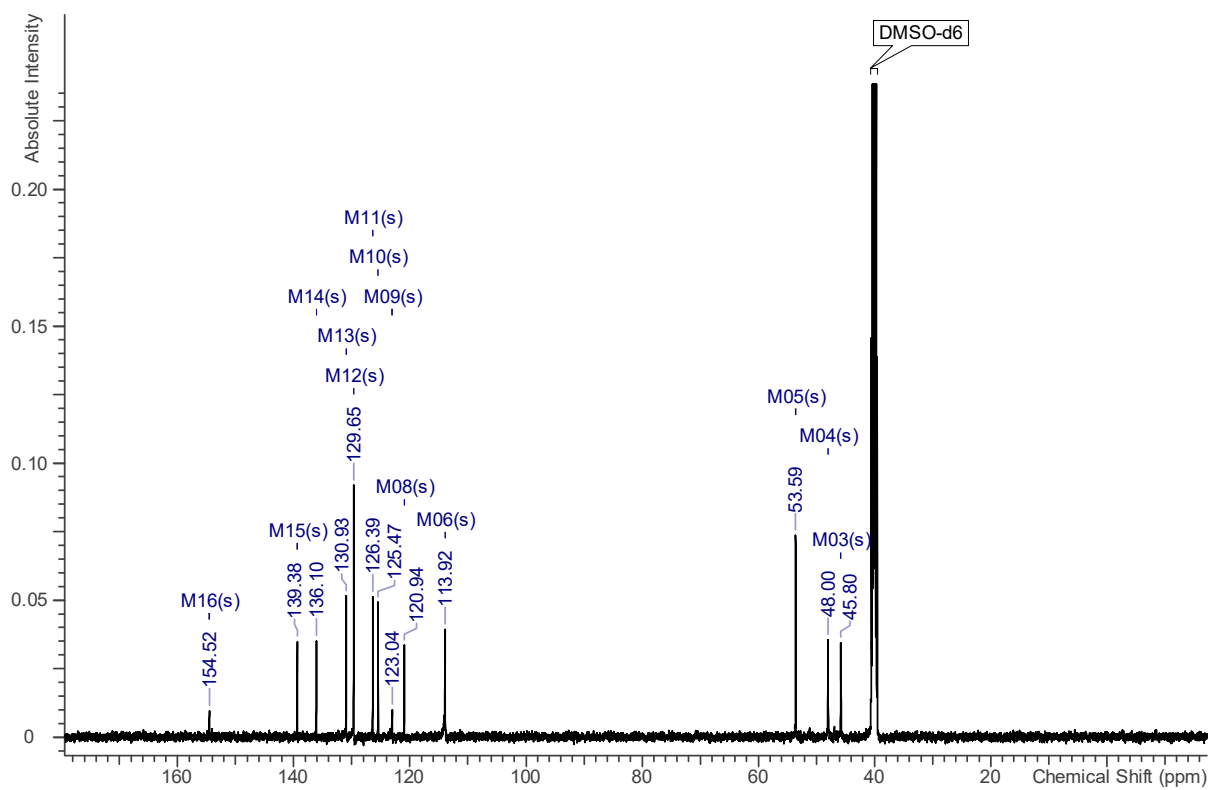

### 3.5. 2-([3-(Piperazin-1-yl)phenyl]sulfonyl)isoindoline **3e**

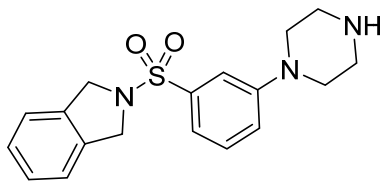

UPLC/MS

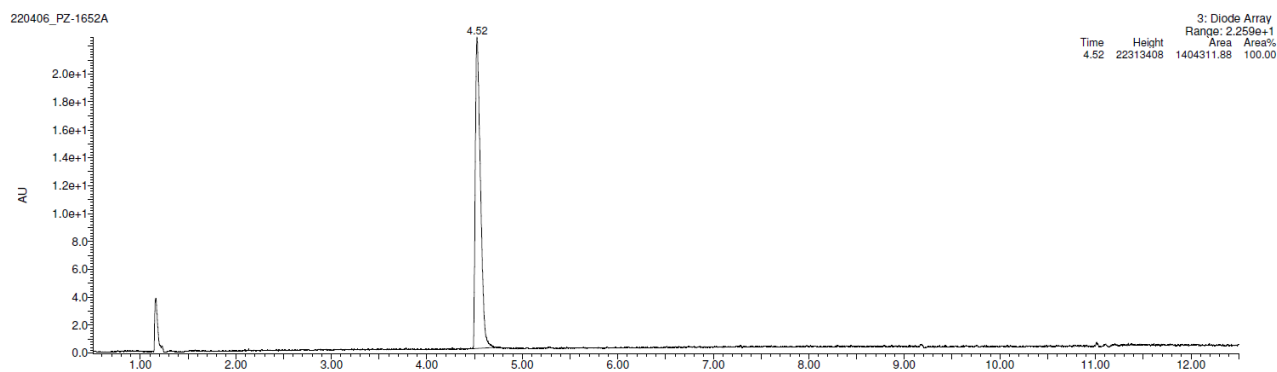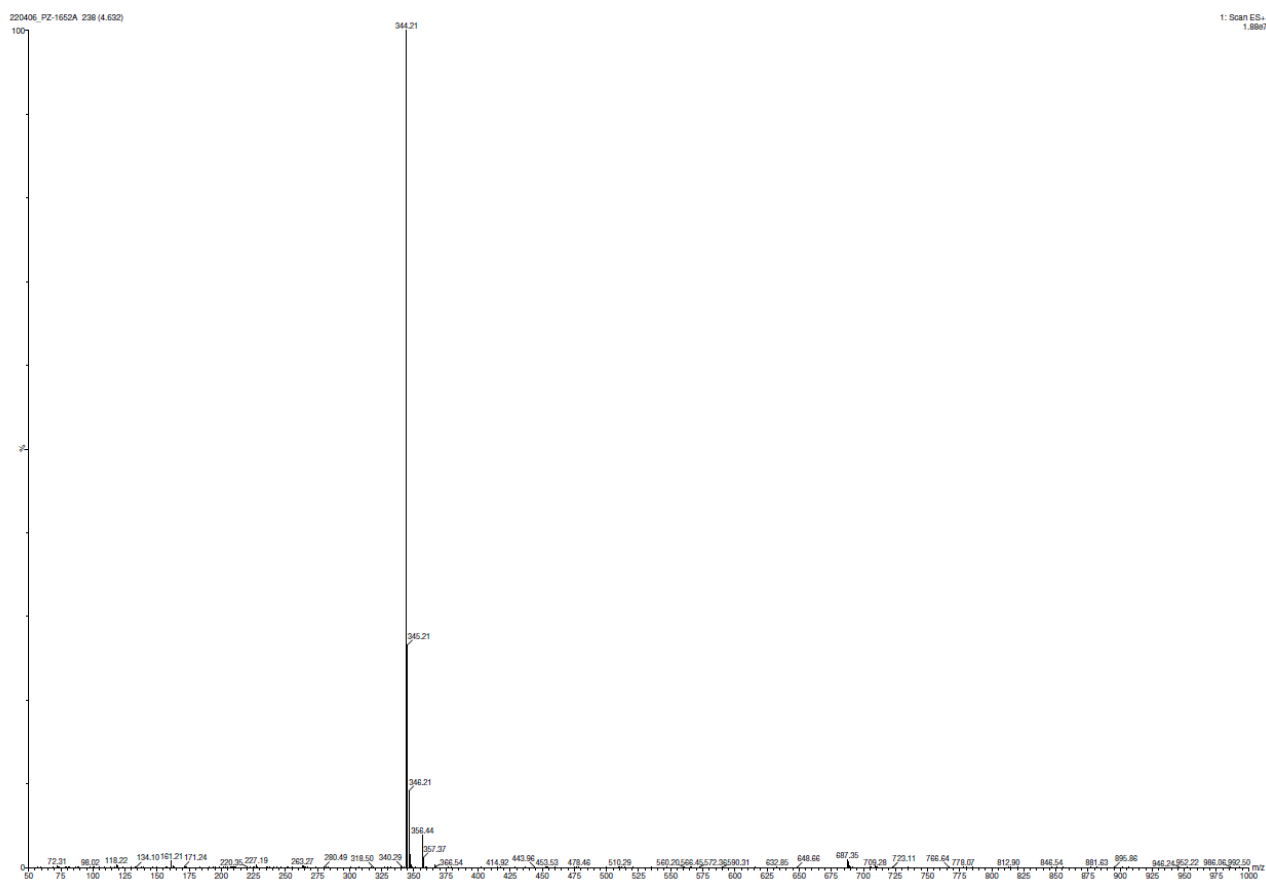

$^1\text{H}$ -NMR (500 MHz,  $\text{CDCl}_3$ )

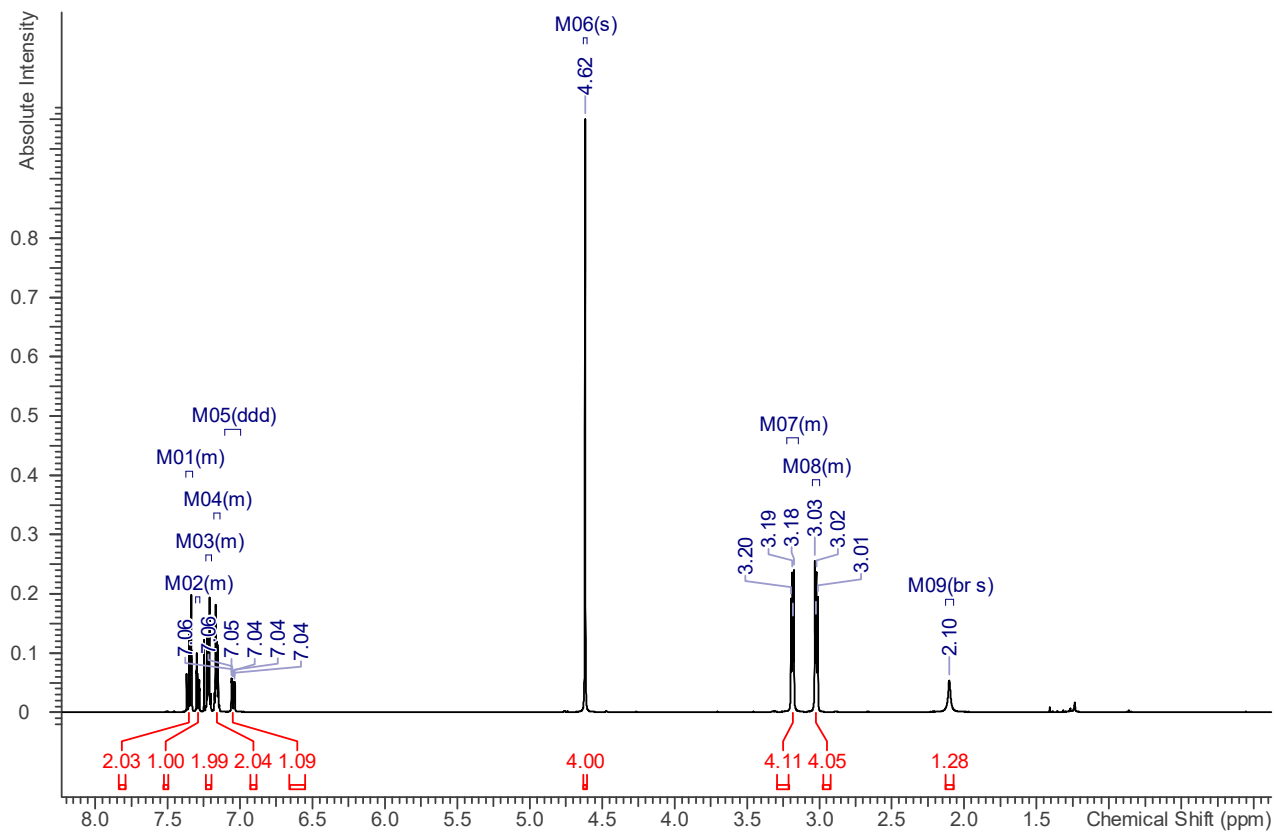

$^{13}\text{C}$ -NMR (126 MHz,  $\text{CDCl}_3$ )

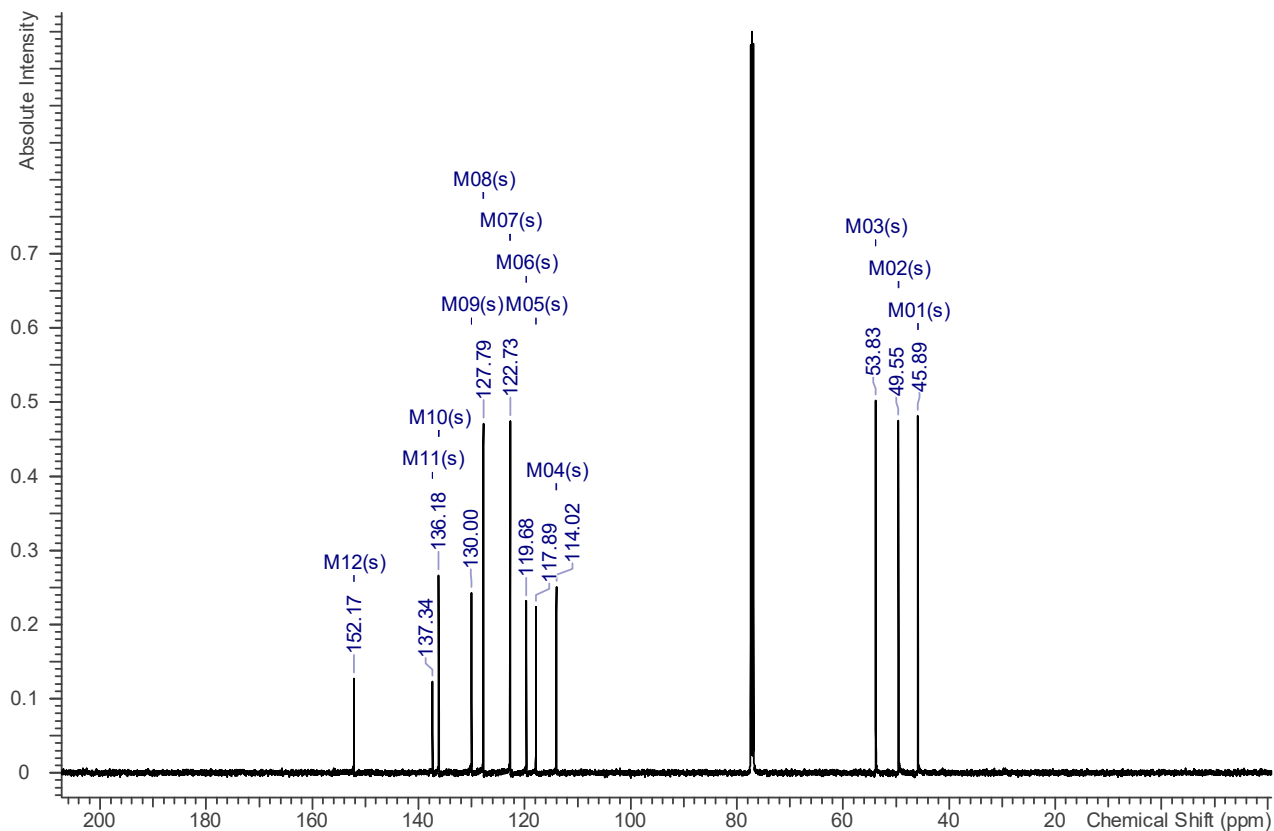



### 3.6. 4-Chloro-2- $\{[3-(\text{piperazin-1-yl})\text{phenyl}]\text{sulfonyl}\}$ isoindoline **3f**

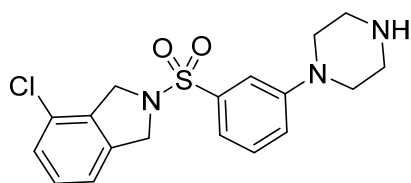

UPLC/MS

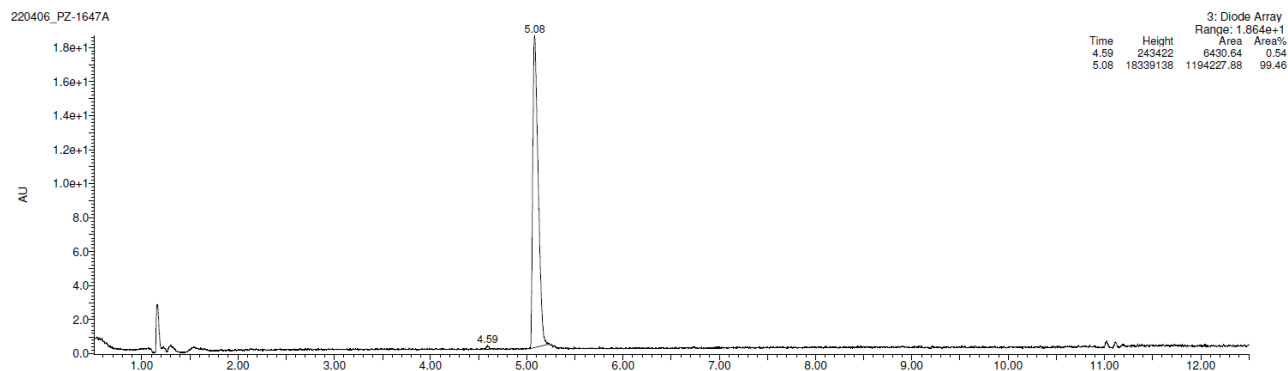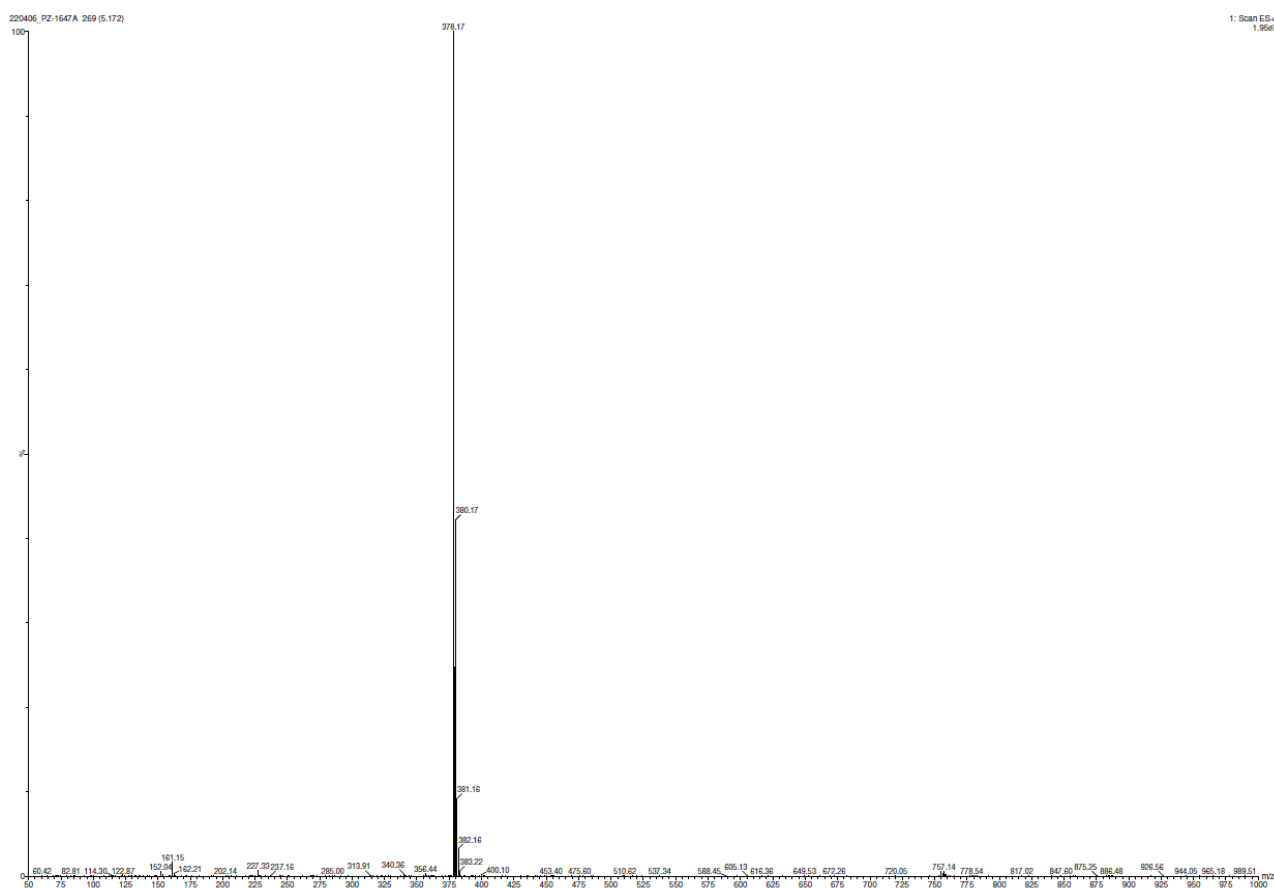

$^1\text{H}$ -NMR (500 MHz,  $\text{CDCl}_3$ )

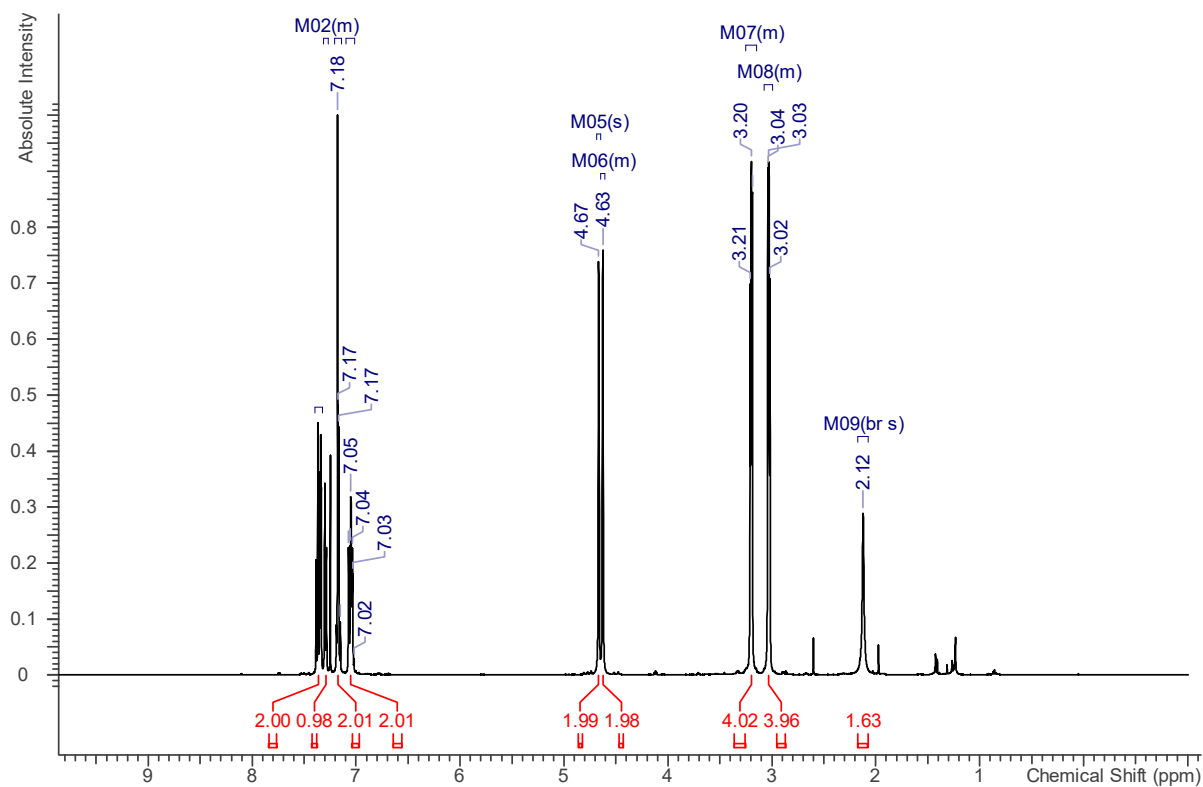

$^{13}\text{C}$ -NMR (126 MHz,  $\text{CDCl}_3$ )

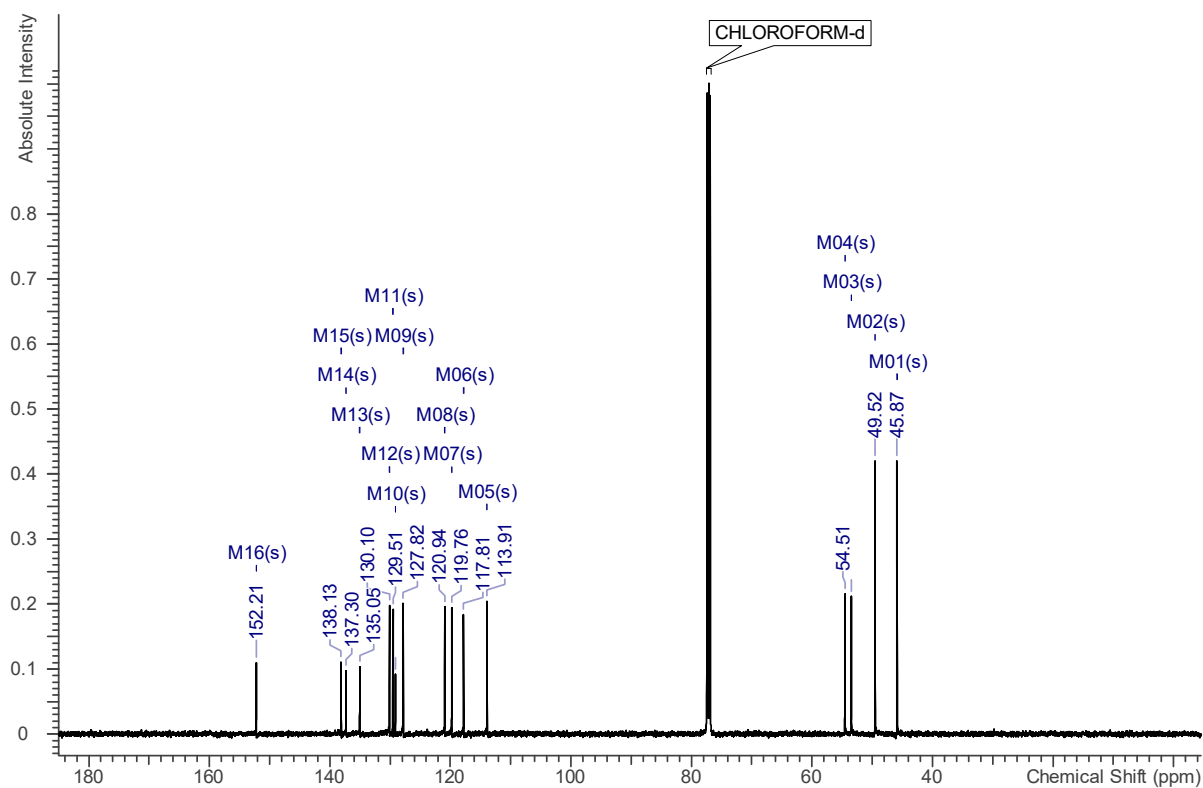

### 3.7. 4-Bromo-2-{{3-(piperazin-1-yl)phenyl}sulfonyl}isoindoline **3g**

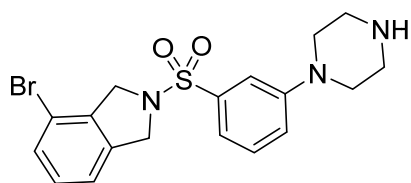

UPLC/MS

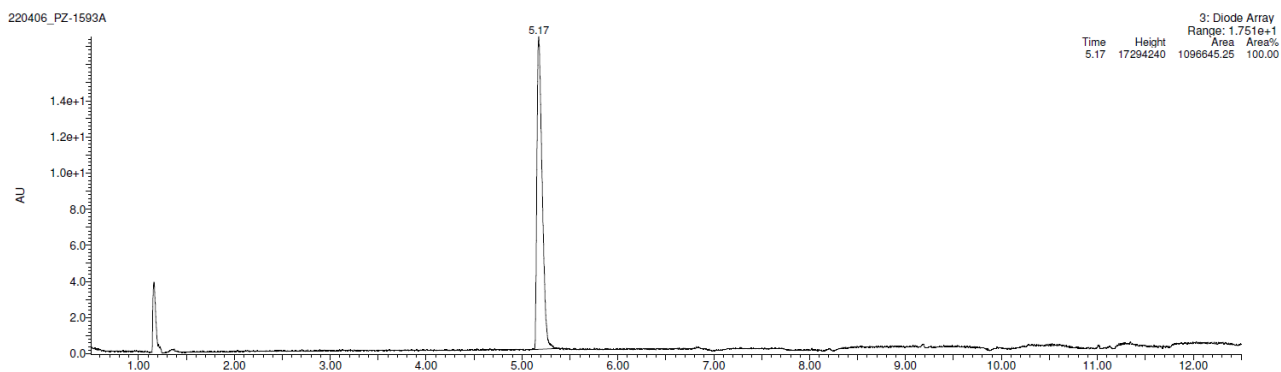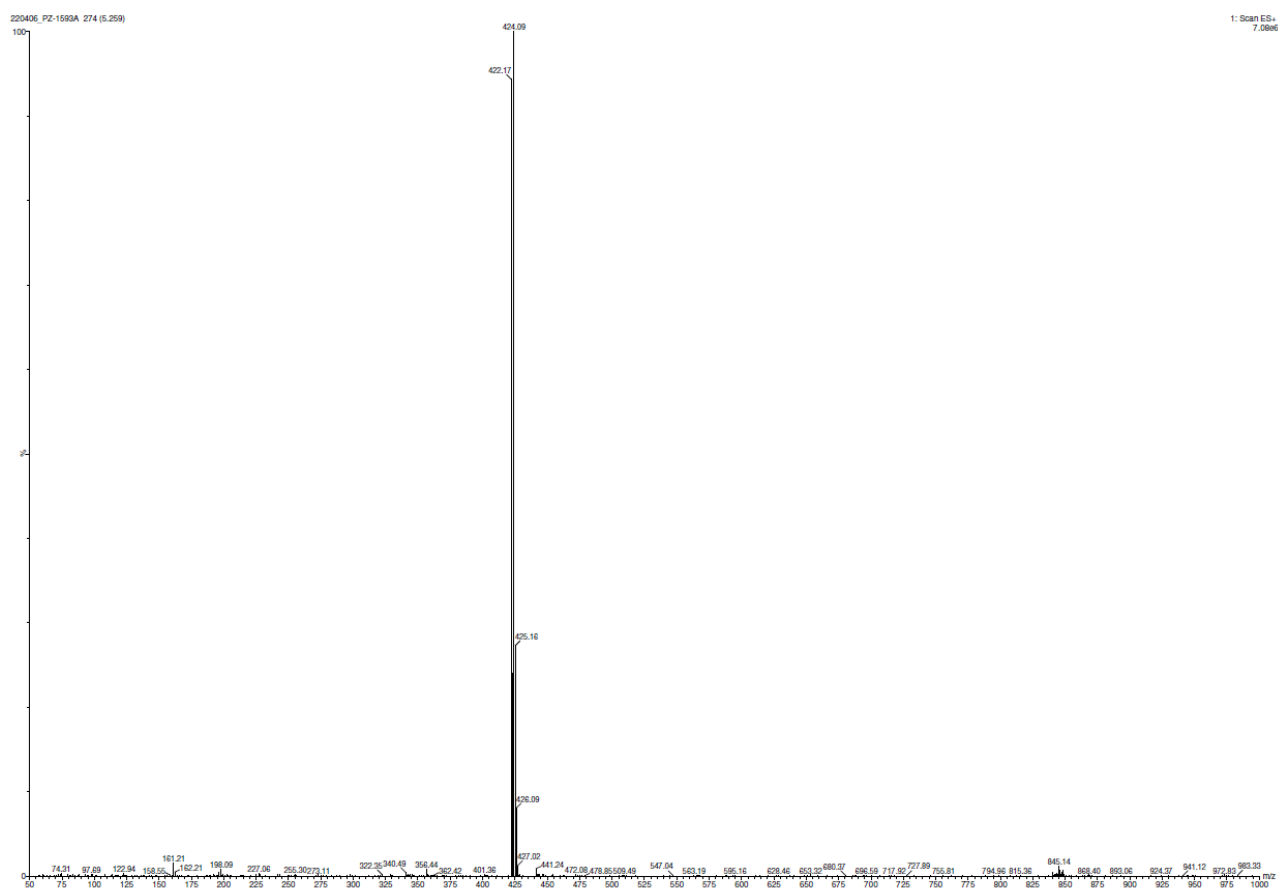

$^1\text{H}$ -NMR (500 MHz,  $\text{DMSO}-d_6$ )

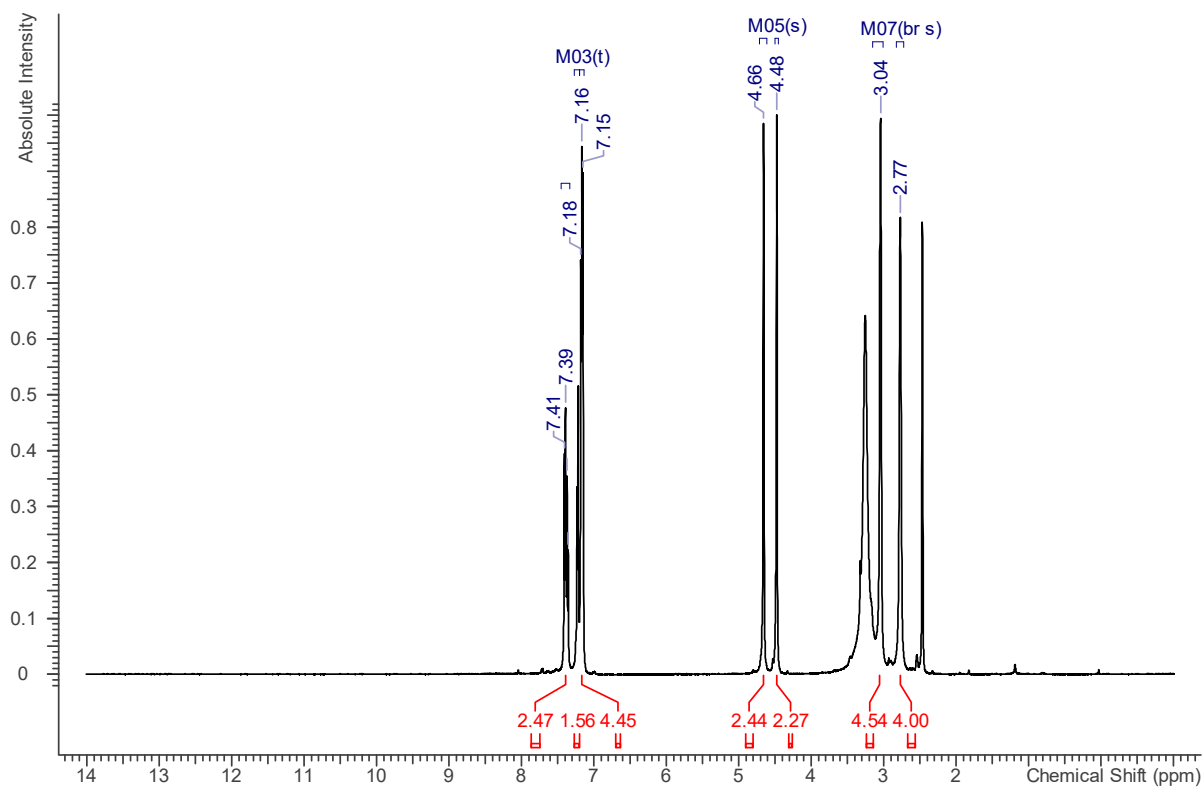

$^{13}\text{C}$ -NMR (126 MHz,  $\text{DMSO}-d_6$ )

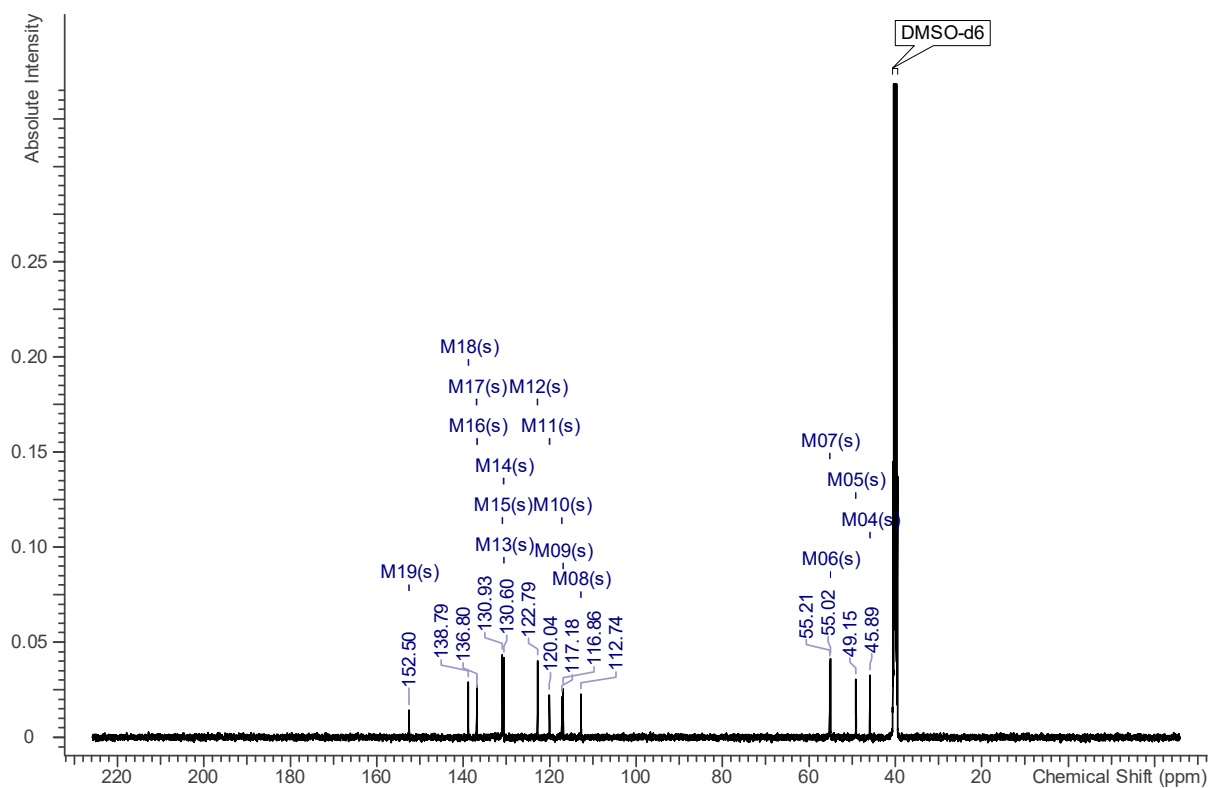

### 3.8. 5-Bromo-2-([3-(piperazin-1-yl)phenyl]sulfonyl)isoindoline **3h**

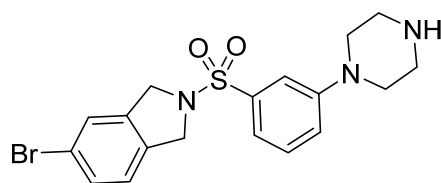

#### UPLC/MS

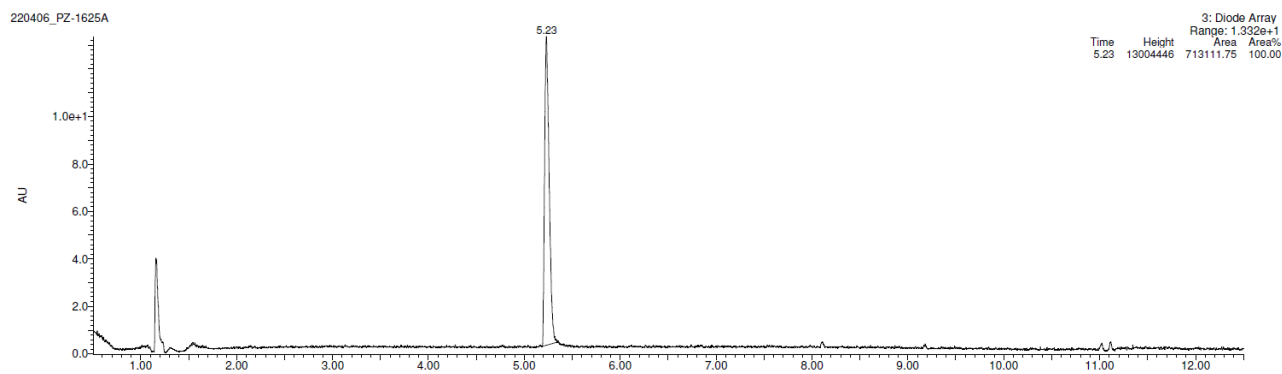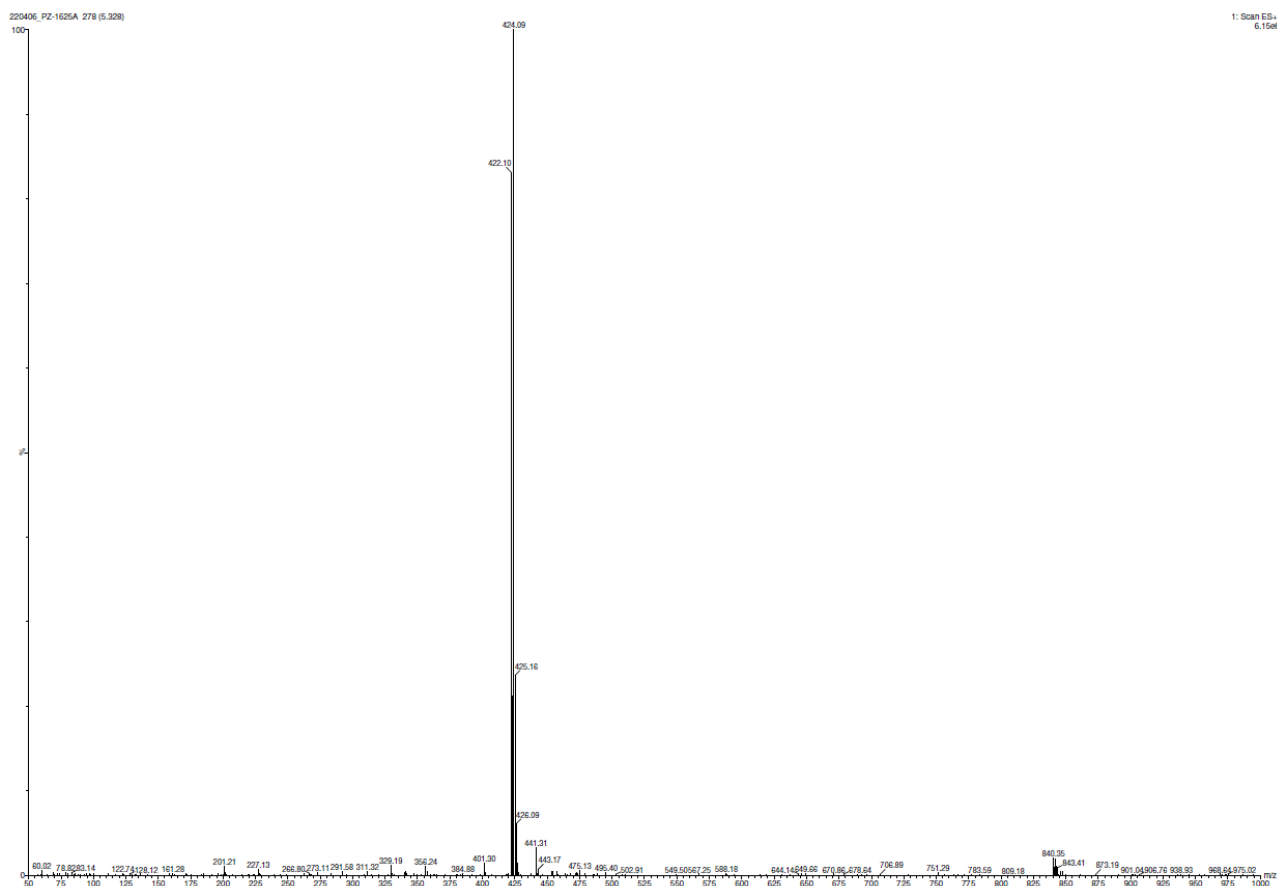

$^1\text{H}$ -NMR (500 MHz, DMSO- $d_6$ )

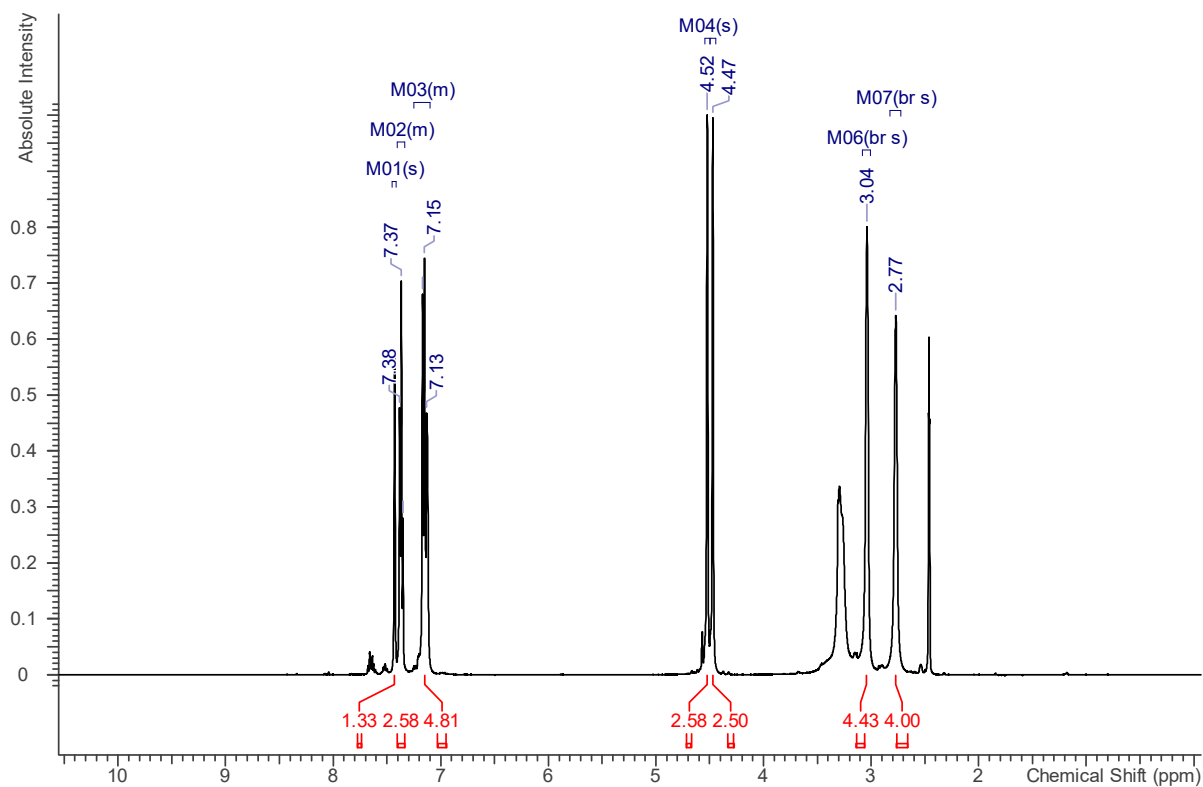

$^{13}\text{C}$ -NMR (126 MHz, DMSO- $d_6$ )

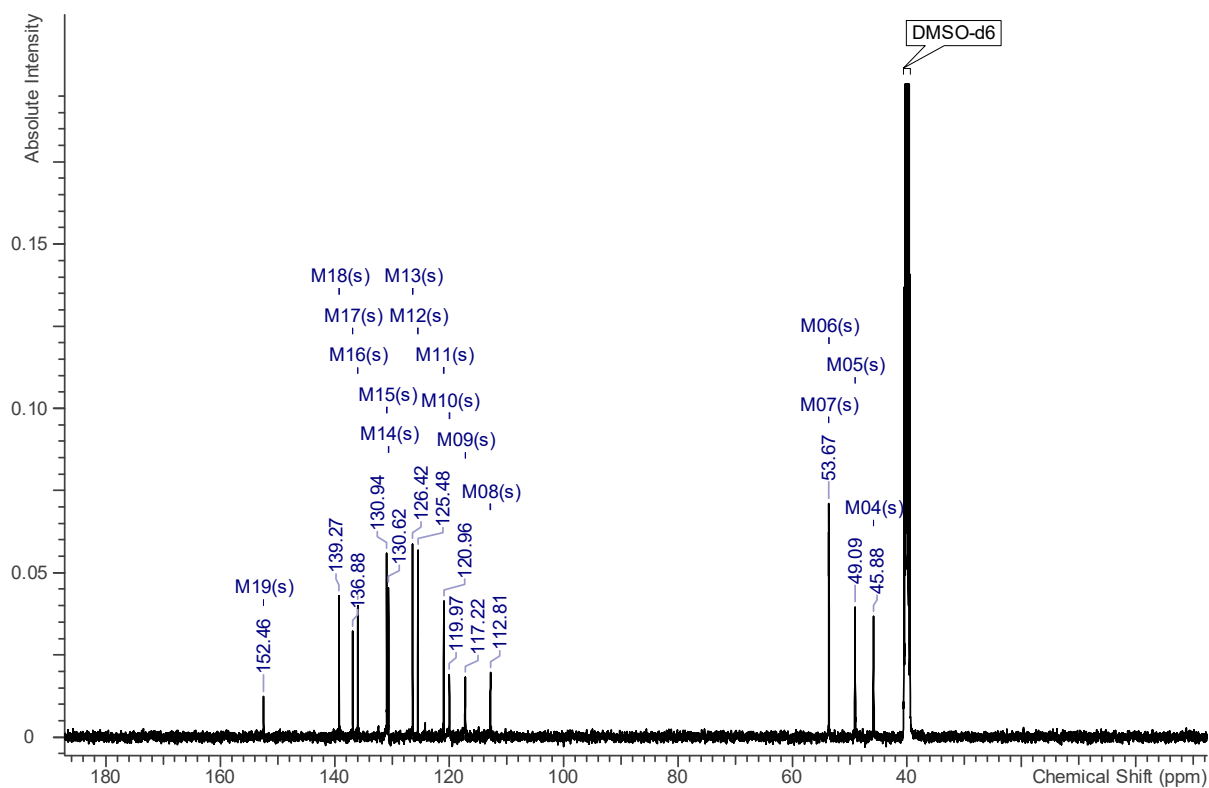

### 3.9. 2-([2-(Piperazin-1-yl)phenyl]sulfonyl)isoindoline **3i**

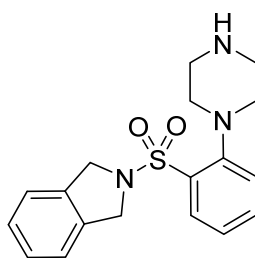

UPLC/MS

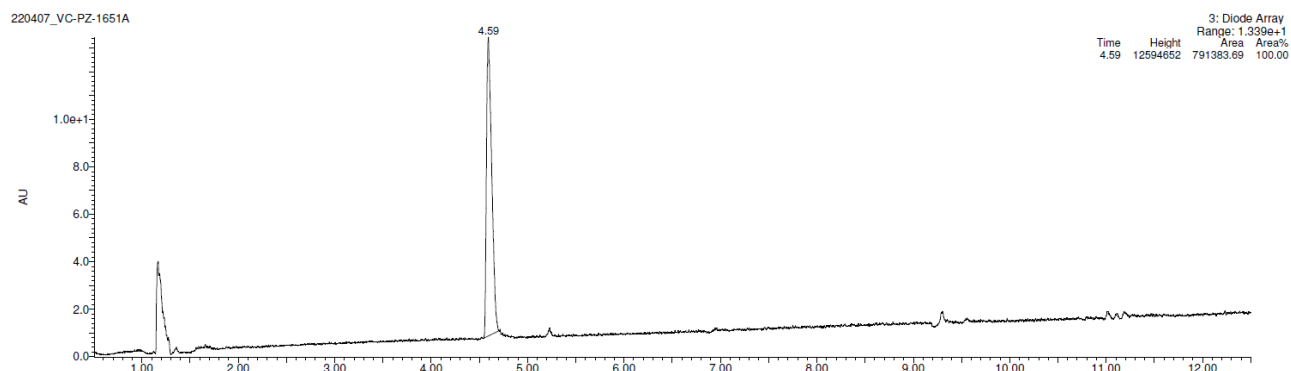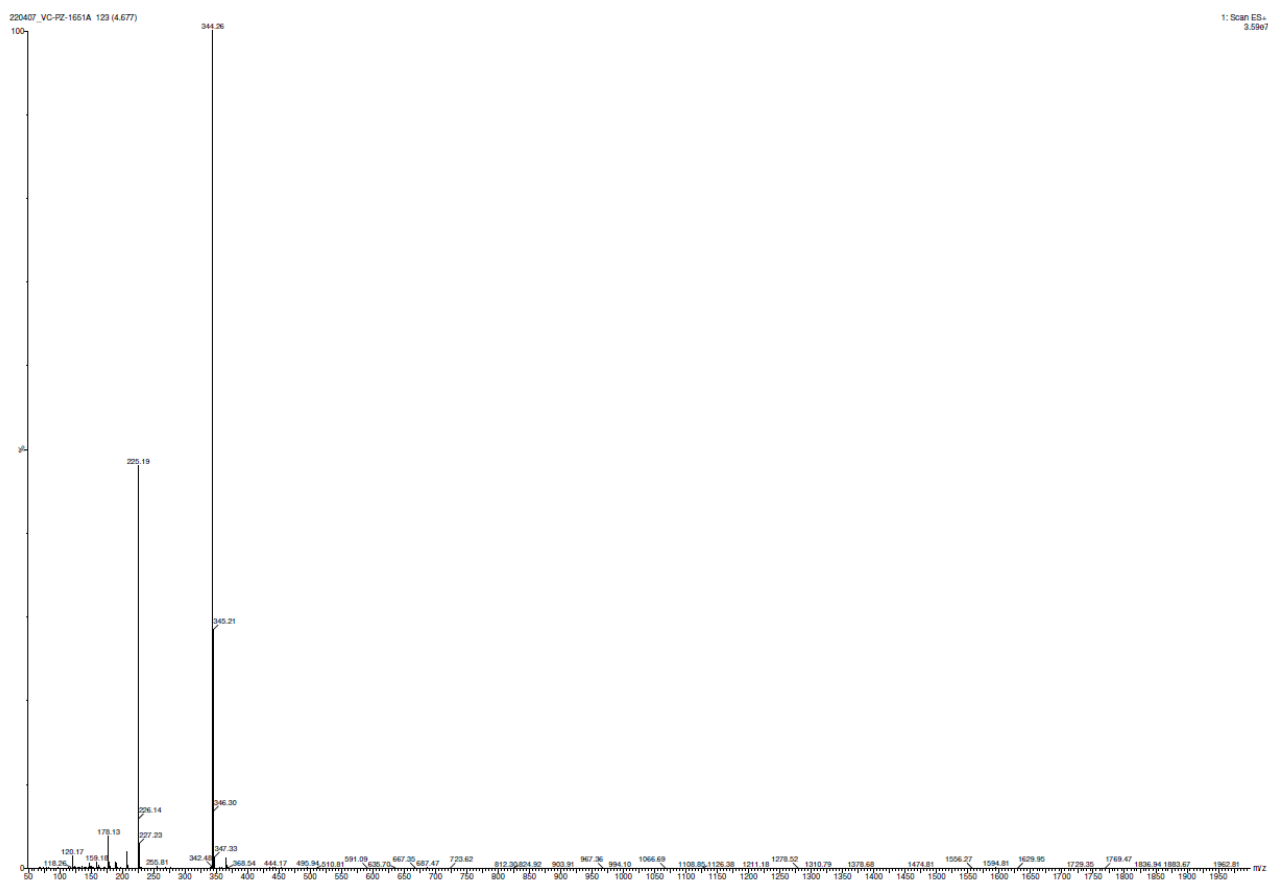

$^1\text{H}$ -NMR (500 MHz,  $\text{CDCl}_3$ )

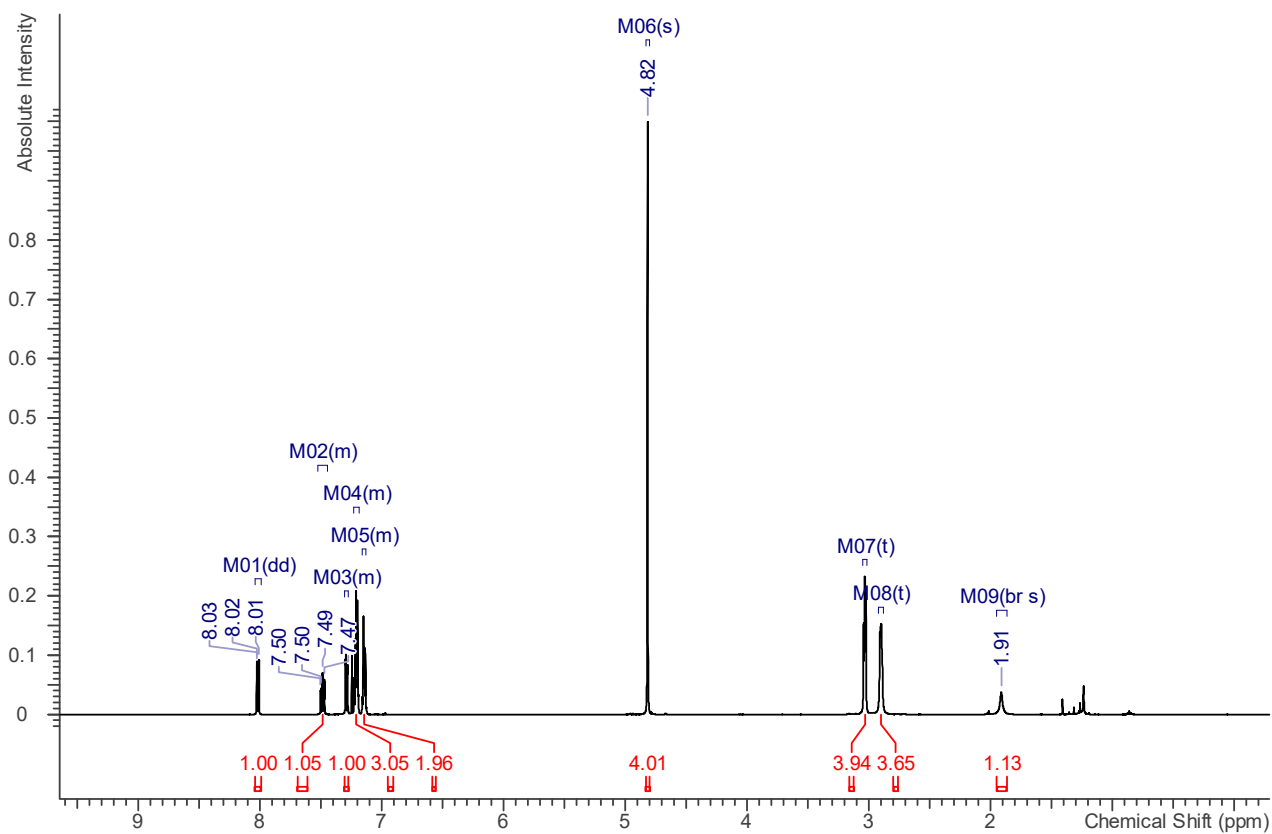

$^{13}\text{C}$ -NMR (126 MHz,  $\text{CDCl}_3$ )

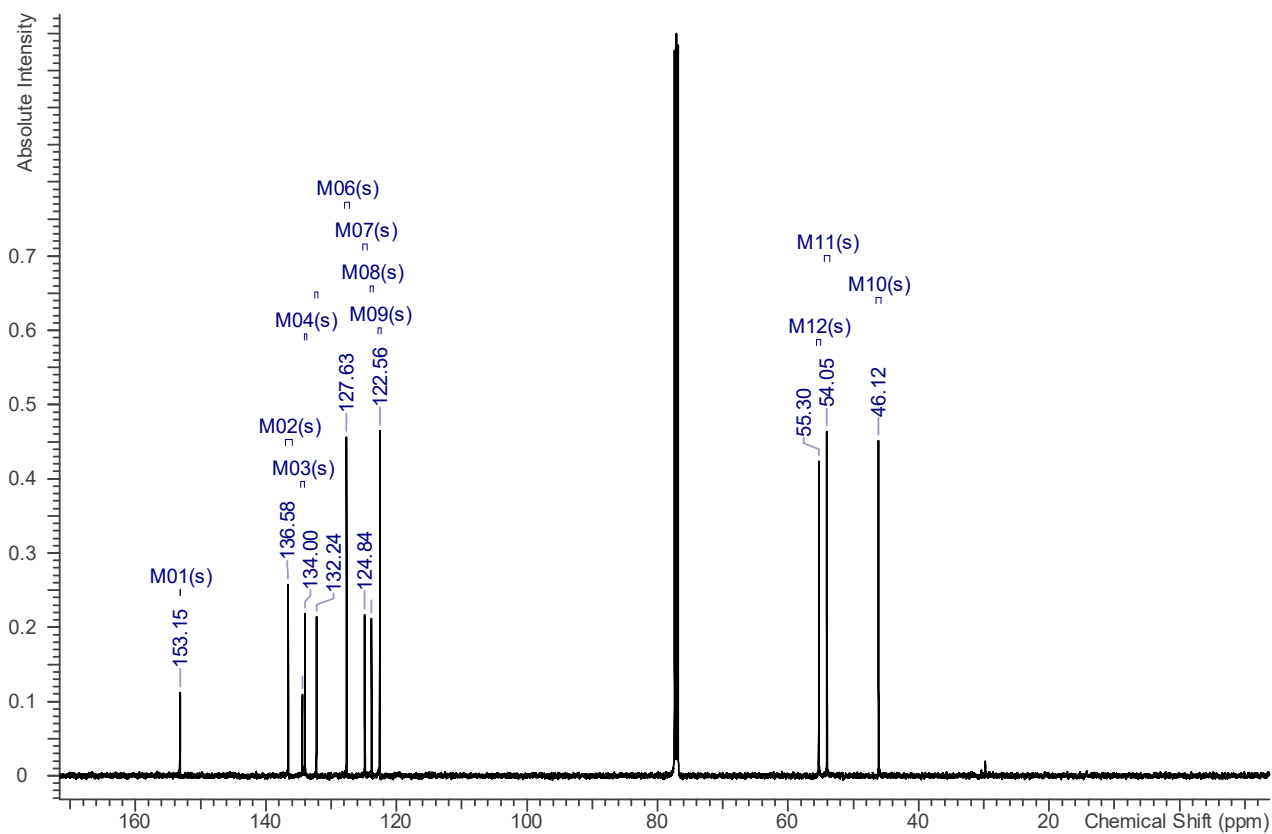



### 3.10. 4-Chloro-2-{{2-(piperazin-1-yl)phenyl}sulfonyl}isoindoline **3j**

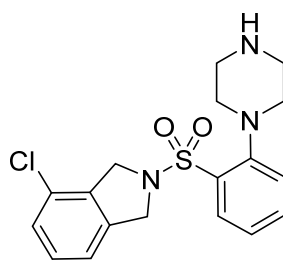

UPLC/MS

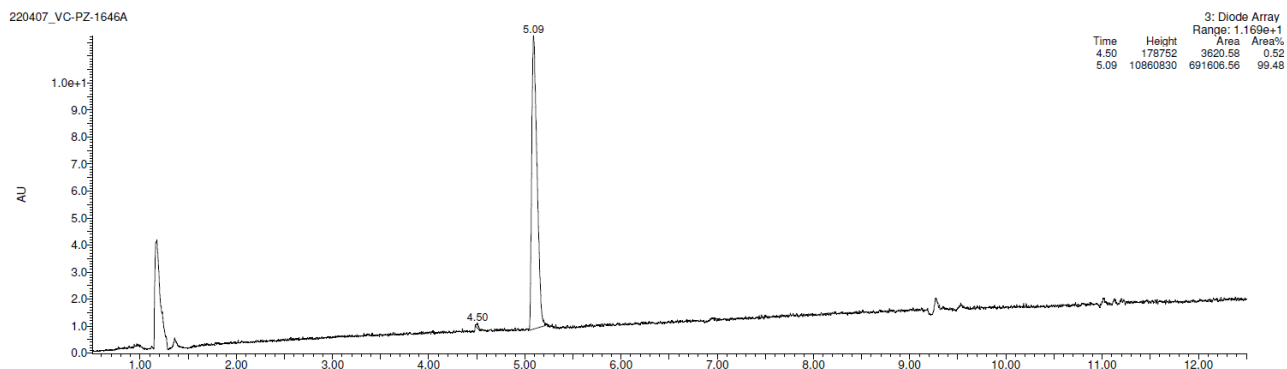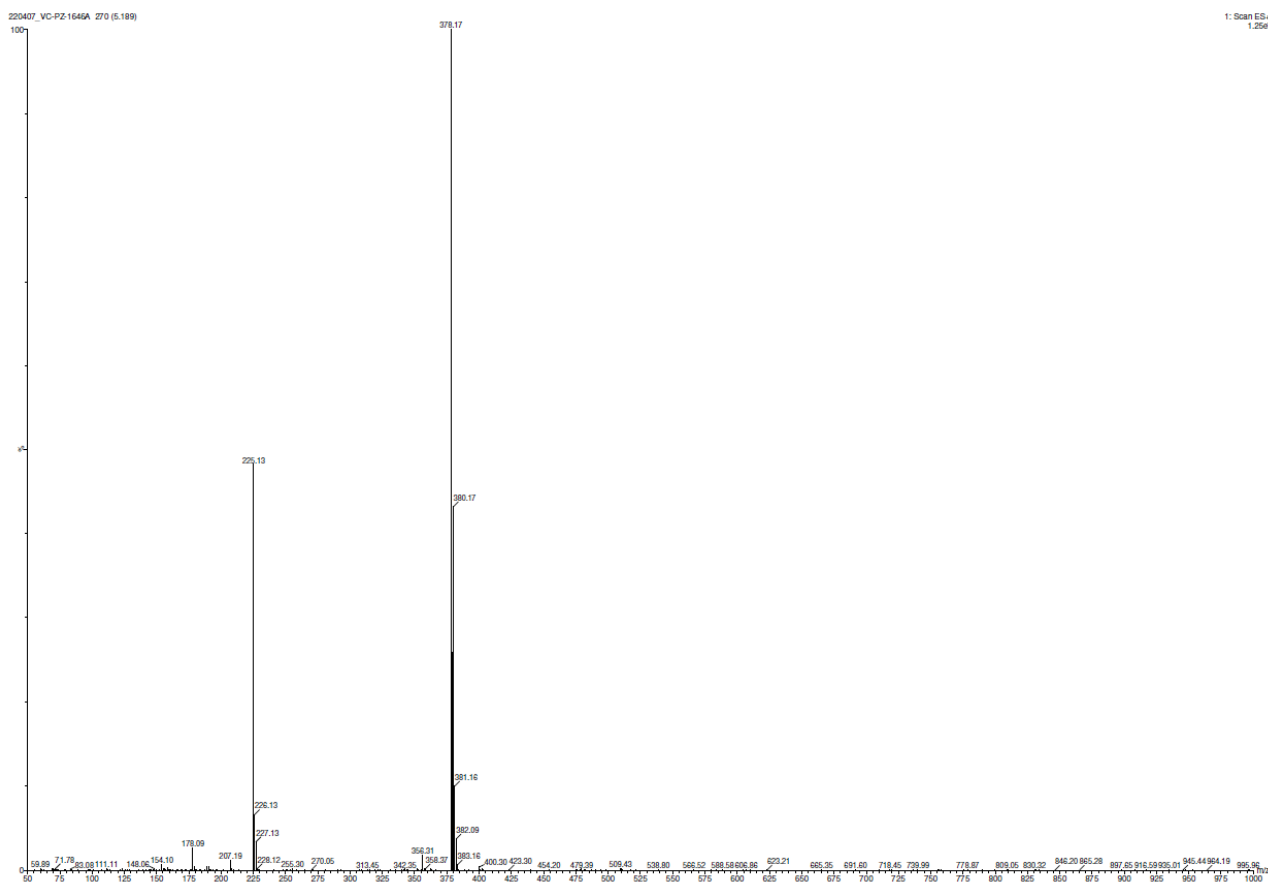

$^1\text{H}$ -NMR (500 MHz,  $\text{CDCl}_3$ )

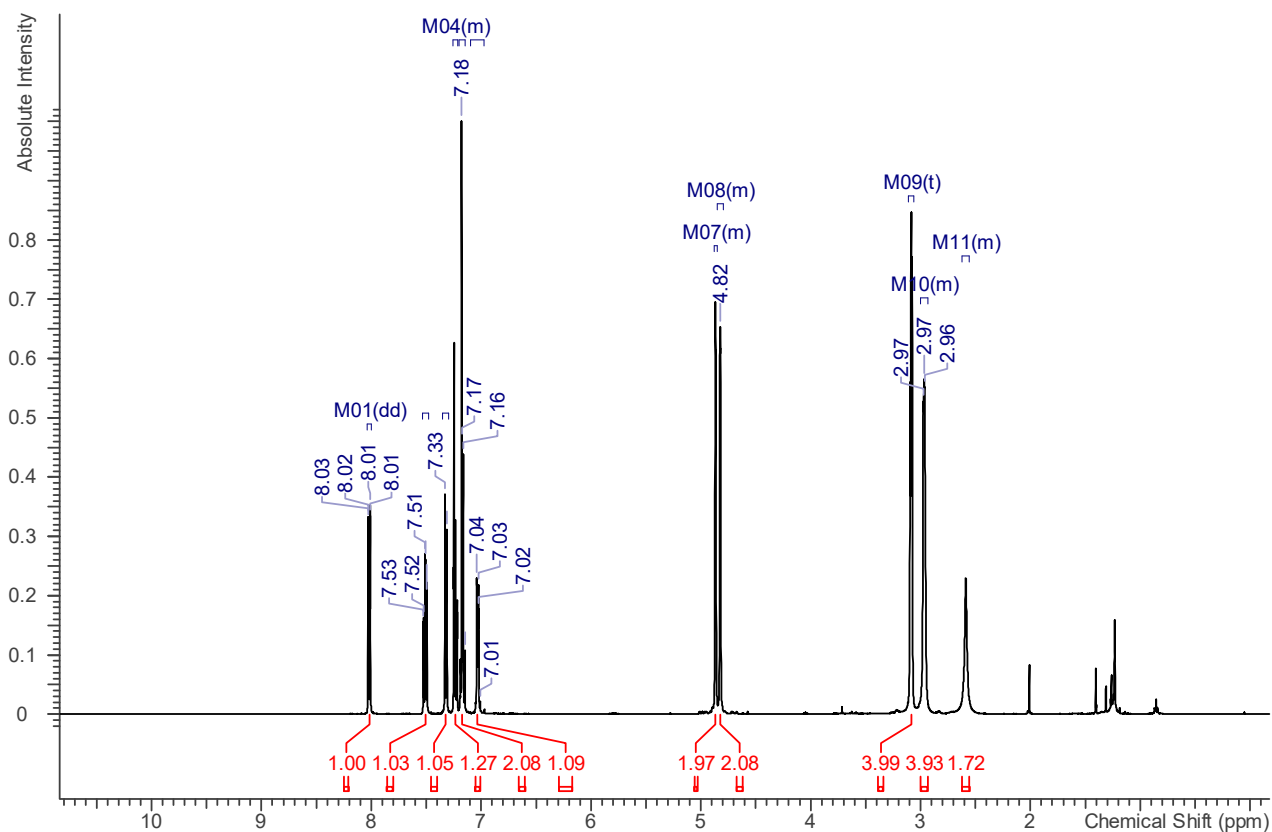

$^{13}\text{C}$ -NMR (126 MHz,  $\text{CDCl}_3$ )

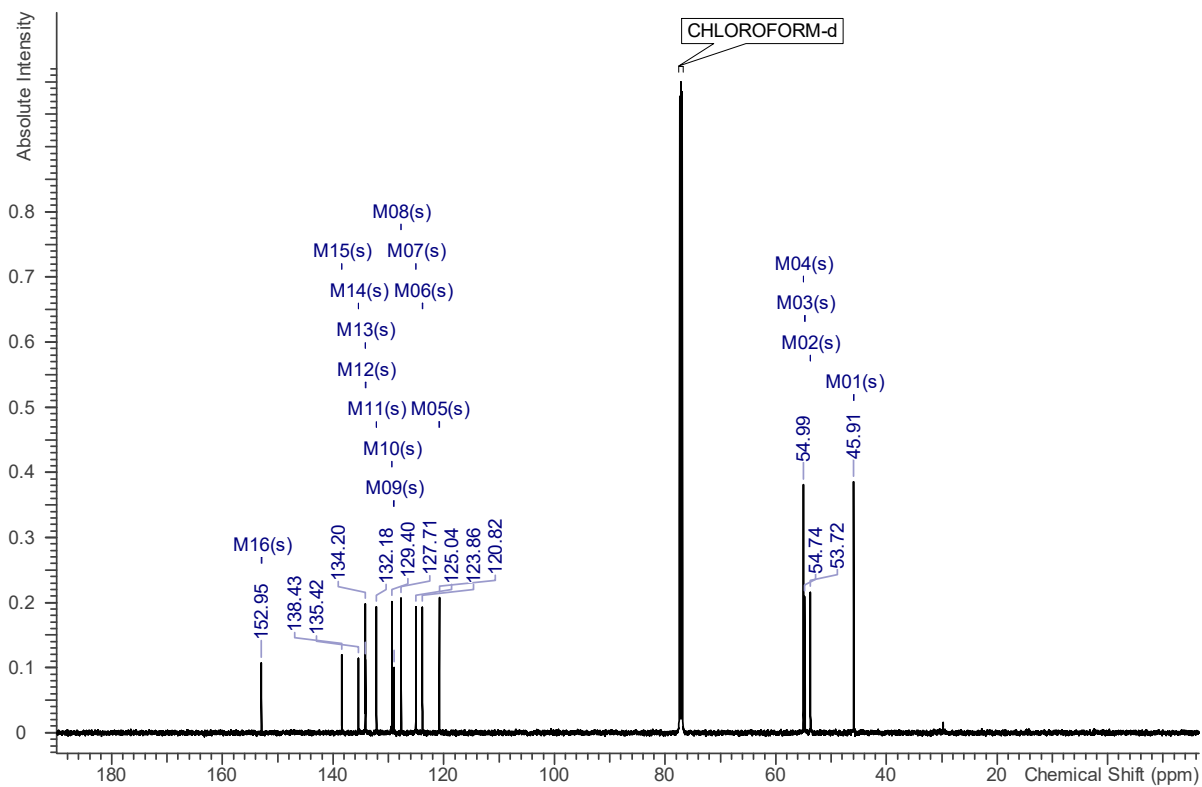

### 3.11. 4-Bromo-2-{[2-(piperazin-1-yl)phenyl]sulfonyl}isoindoline **3k**

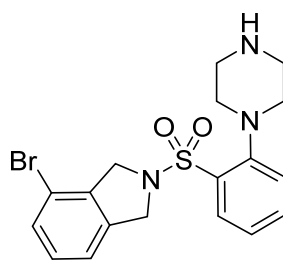

UPLC/MS

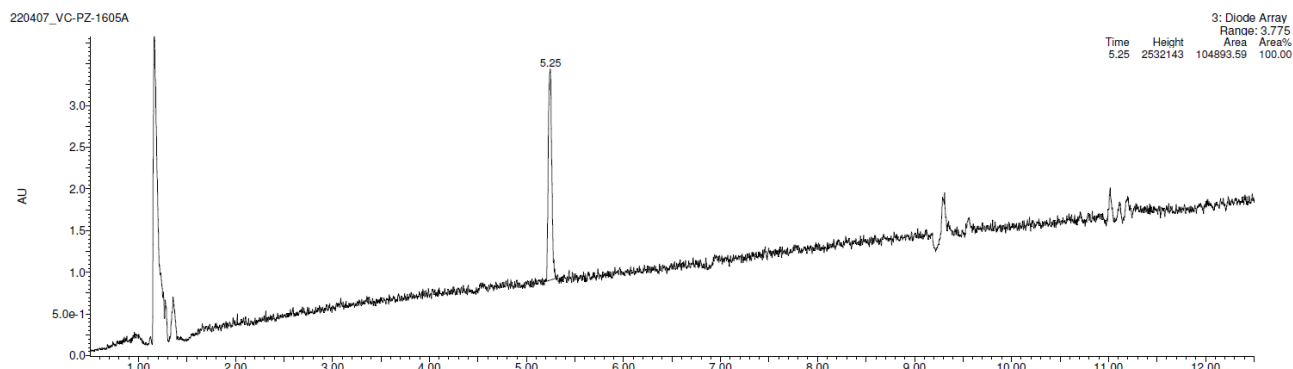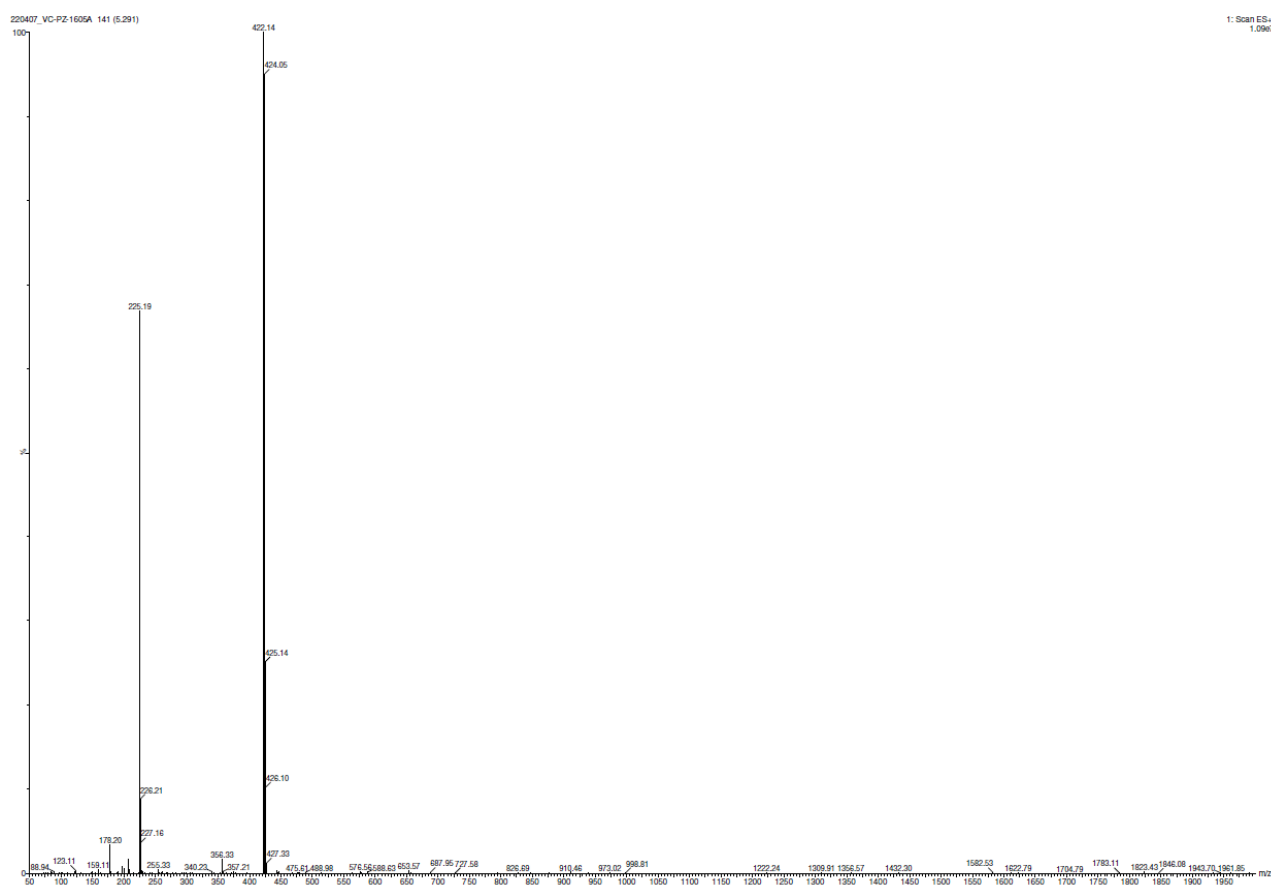

$^1\text{H}$ -NMR (500 MHz, DMSO- $d_6$ )

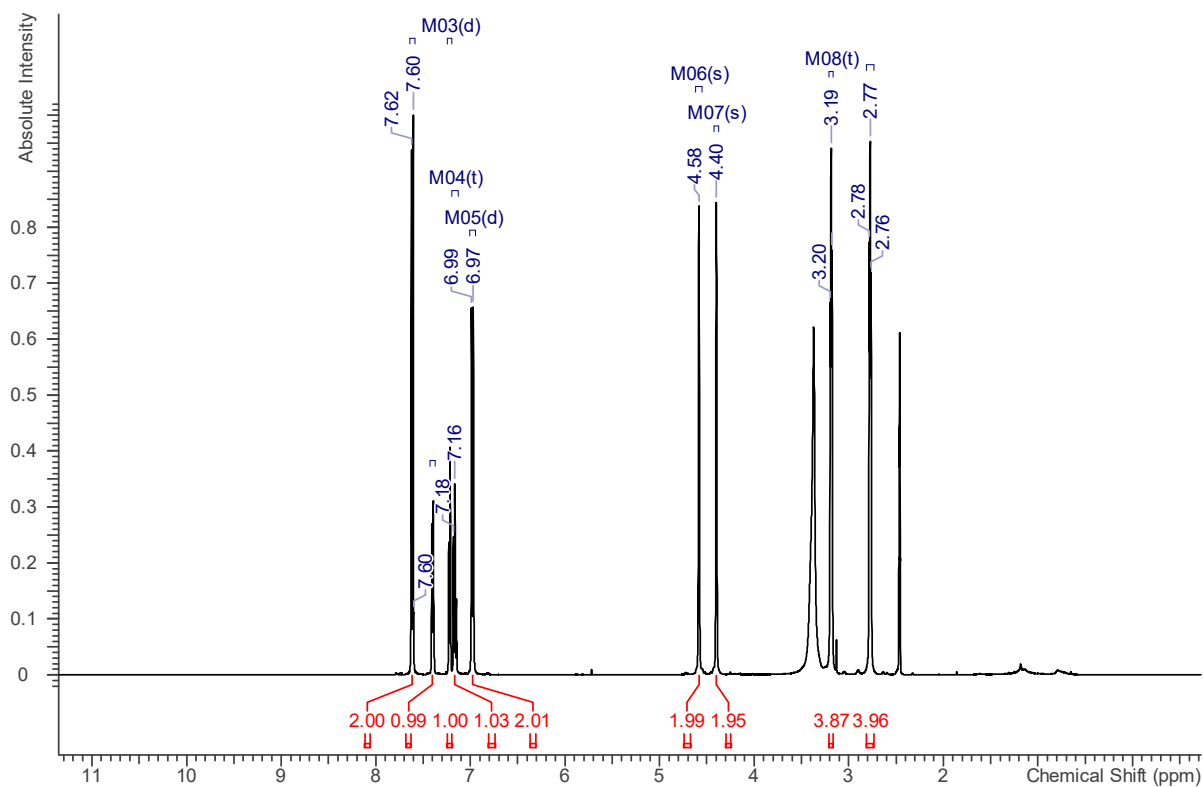

$^{13}\text{C}$ -NMR (126 MHz, DMSO- $d_6$ )

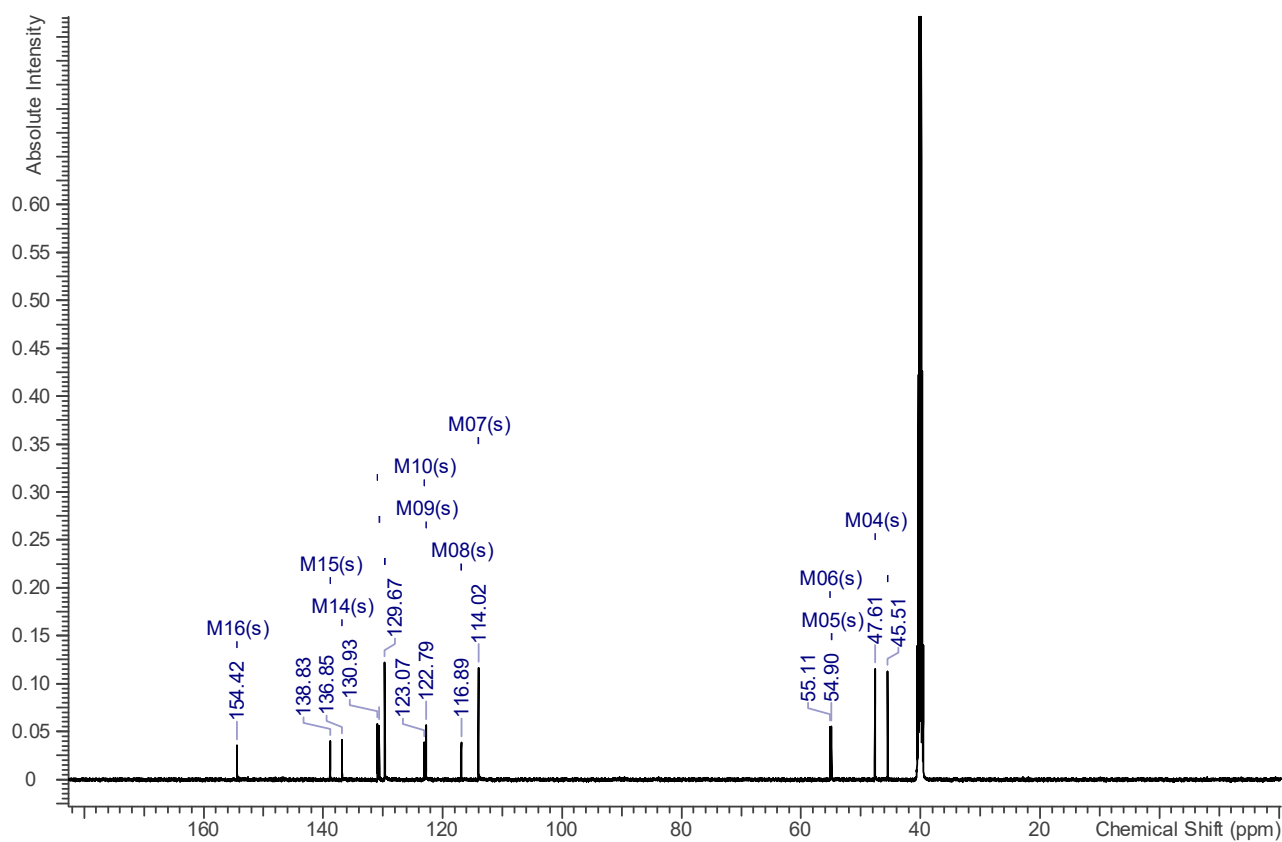

3.12. 5-Bromo-2-{[2-(piperazin-1-yl)phenyl]sulfonyl}isoindoline **3l**

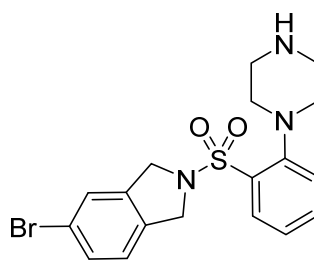

UPLC/MS

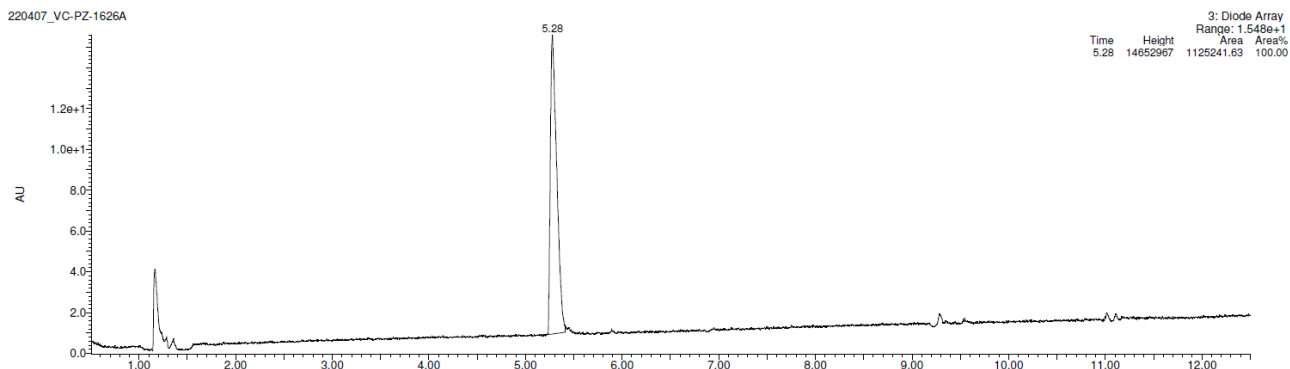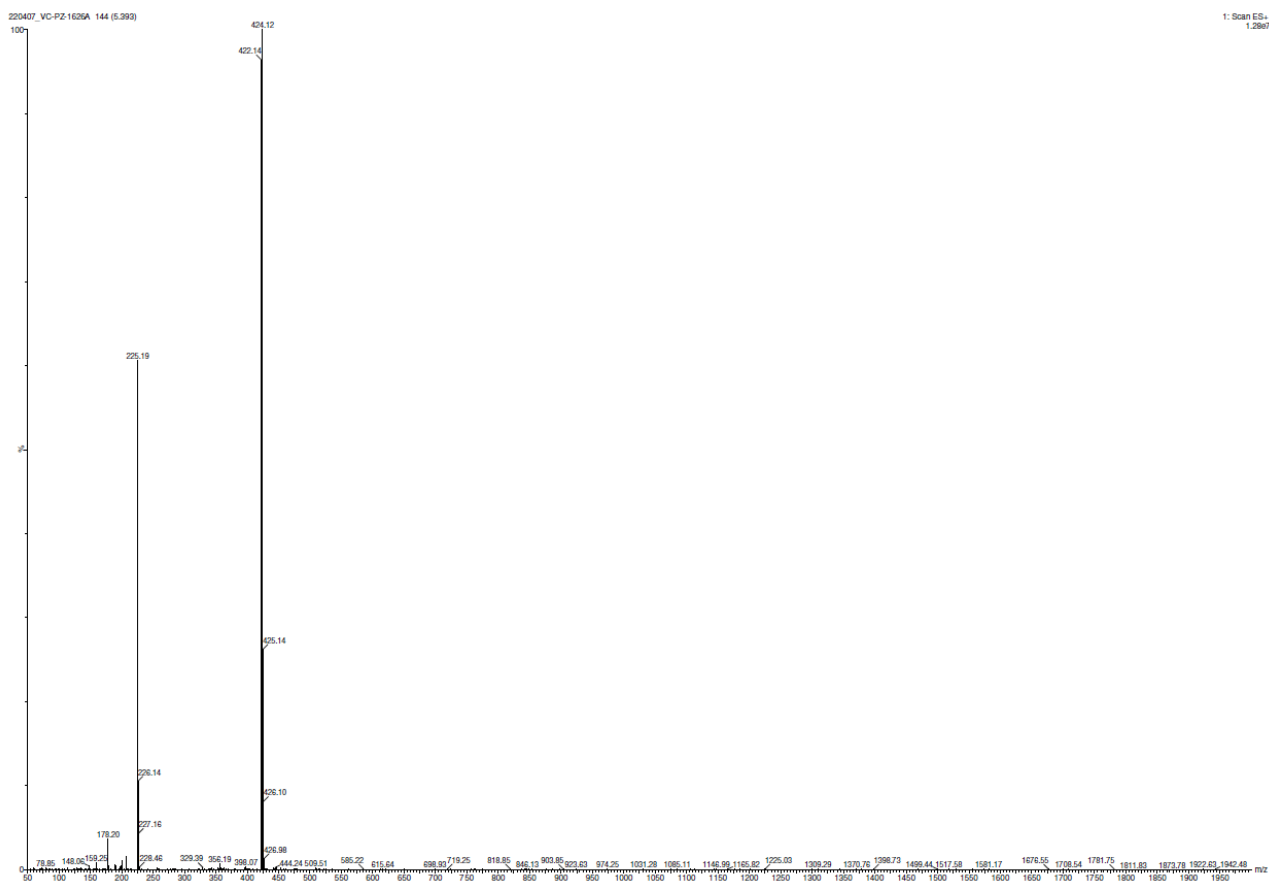

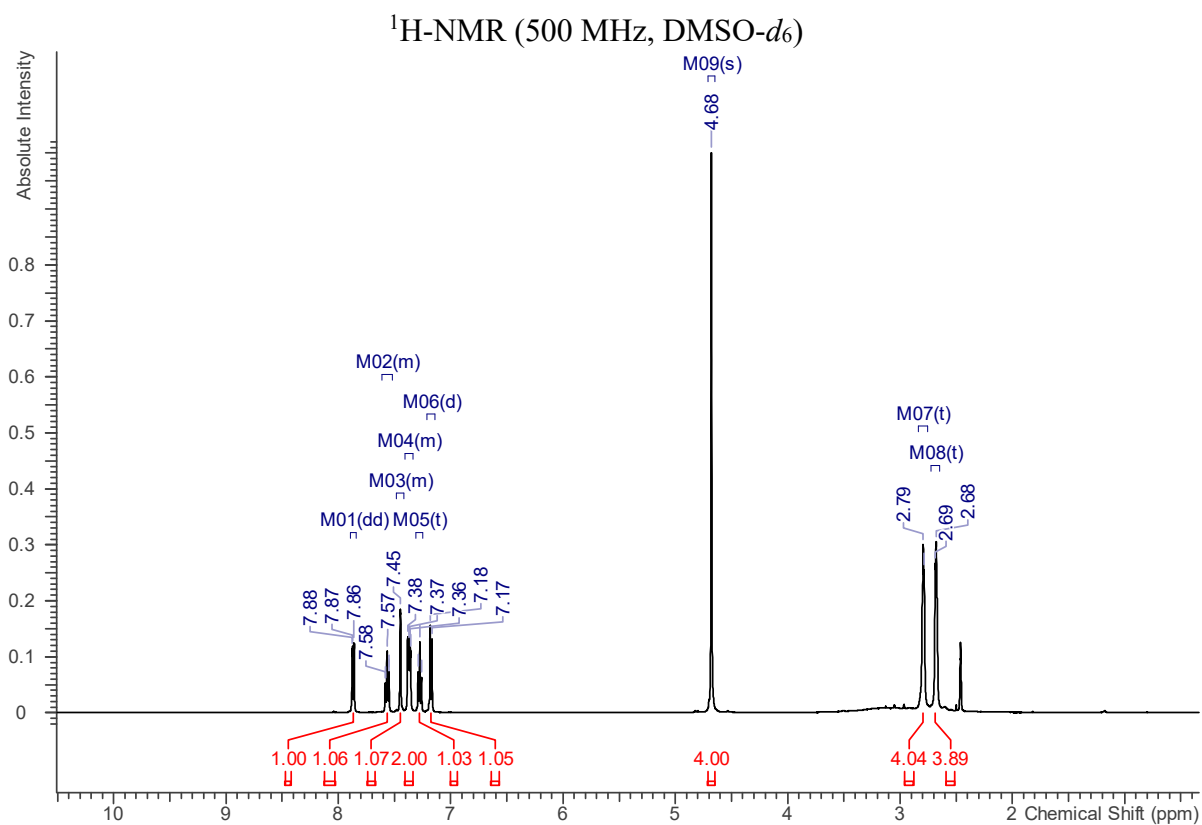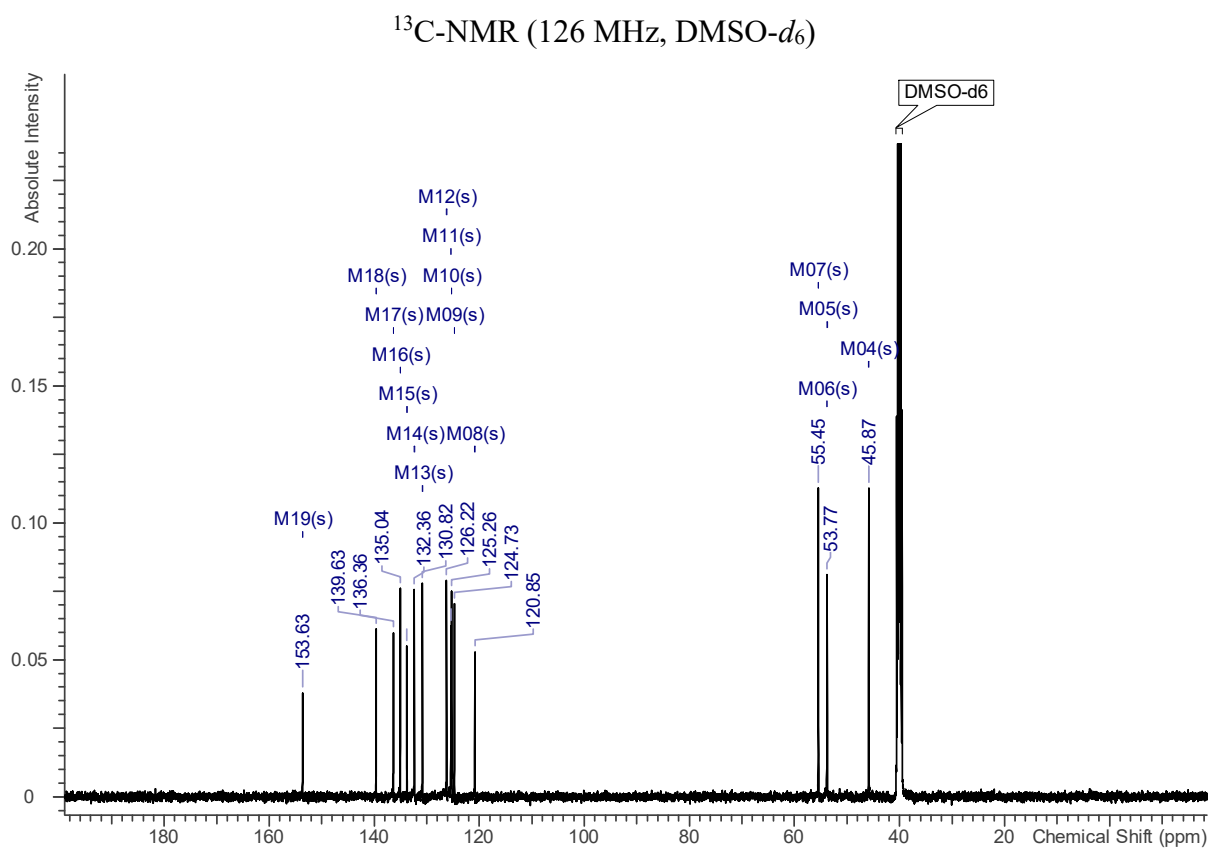

**Table S1–SI.** Optimization of milling conditions for sulfonylation of isoindolines **1a–d**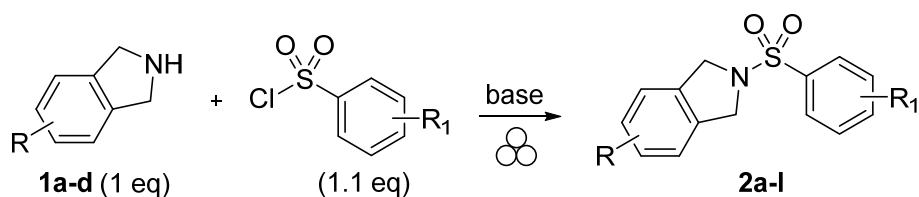

| entry                 | R    | R <sub>1</sub><br>[eq] | Base<br>[eq]                       | time<br>[min] | % conversion <sup>a</sup> | % yield <sup>b</sup> | product   |
|-----------------------|------|------------------------|------------------------------------|---------------|---------------------------|----------------------|-----------|
| <b>1<sup>c</sup></b>  | H    | 4-F                    | K <sub>2</sub> CO <sub>3</sub> (2) | 5             | 97                        | 95                   | <b>2a</b> |
| <b>2<sup>c</sup></b>  | H    | 4-F                    | NaHCO <sub>3</sub> (2)             | 5             | 69                        | ND                   | <b>2a</b> |
| <b>3<sup>c</sup></b>  | H    | 4-F                    | KOH (2)                            | 5             | 77                        | ND                   | <b>2a</b> |
| <b>4<sup>c</sup></b>  | H    | 4-F                    | NaOH (2)                           | 5             | 94                        | 92                   | <b>2a</b> |
| <b>5<sup>c</sup></b>  | H    | 4-F                    | NaOH (3)                           | 5             | 100                       | 98                   | <b>2a</b> |
| <b>6<sup>d</sup></b>  | H    | 4-F                    | NaOH (3)                           | 5             | 100                       | 98                   | <b>2a</b> |
| <b>7<sup>d</sup></b>  | 4-Cl | 4-F                    | NaOH (3)                           | 7             | 85                        | 81                   | <b>2b</b> |
| <b>8<sup>d</sup></b>  | 4-Br | 4-F                    | NaOH (3)                           | 7             | 83                        | 81                   | <b>2c</b> |
| <b>9<sup>d</sup></b>  | 5-Br | 4-F                    | NaOH (3)                           | 7             | 89                        | 86                   | <b>2d</b> |
| <b>10<sup>d</sup></b> | H    | 3-F                    | NaOH (3)                           | 5             | 98                        | 96                   | <b>2e</b> |
| <b>11<sup>d</sup></b> | 4-Cl | 3-F                    | NaOH (3)                           | 7             | 79                        | 75                   | <b>2f</b> |
| <b>12<sup>d</sup></b> | 4-Br | 3-F                    | NaOH (3)                           | 7             | 82                        | 79                   | <b>2g</b> |
| <b>13<sup>d</sup></b> | 5-Br | 3-F                    | NaOH (3)                           | 7             | 87                        | 85                   | <b>2h</b> |
| <b>14<sup>d</sup></b> | H    | 2-F                    | NaOH (3)                           | 5             | 95                        | 93                   | <b>2i</b> |
| <b>15<sup>d</sup></b> | 4-Cl | 2-F                    | NaOH (3)                           | 7             | 82                        | 79                   | <b>2j</b> |
| <b>16<sup>d</sup></b> | 4-Br | 2-F                    | NaOH (3)                           | 7             | 86                        | 82                   | <b>2k</b> |
| <b>17<sup>d</sup></b> | 5-Br | 2-F                    | NaOH (3)                           | 7             | 91                        | 88                   | <b>2l</b> |

Reaction conditions: vbm 30 Hz,  $\phi_{\text{ball}} = 1.5$  cm, <sup>a</sup>Conversions were determined by UPLC, <sup>b</sup>Yields were calculated after filtration and washing with H<sub>2</sub>O, <sup>c</sup>10 mL SS jar, total mass of reagents = 85 mg, milling load = 10 mg/mL, <sup>d</sup>35 mL SS jar, total mass of reagents = 350 mg, milling load = 10 mg/mL; ND = not determined.

**Table S2–SI.** Optimization of milling conditions for aromatic substitution of intermediates **2a–l**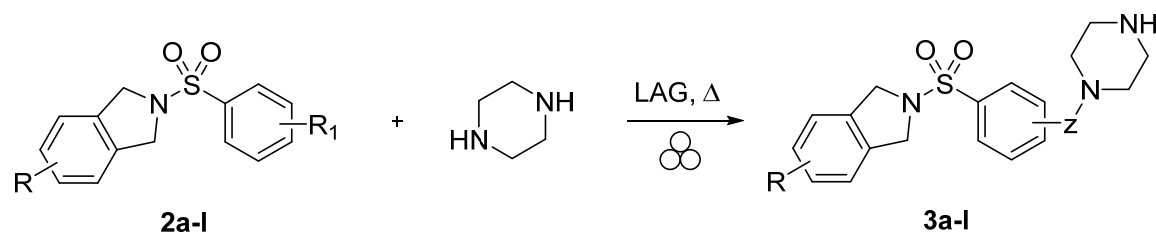

| entry                 | R    | R <sub>1</sub> | LAG<br>[η] <sup>a</sup> | T<br>[°C] | time<br>[min] | %<br>conversion <sup>b</sup> | % yield <sup>c</sup> | product   |
|-----------------------|------|----------------|-------------------------|-----------|---------------|------------------------------|----------------------|-----------|
| <b>1<sup>d</sup></b>  | H    | 4-F            | -                       | 25        | 90            | 0                            | ND                   | <b>3a</b> |
| <b>2<sup>d</sup></b>  | H    | 4-F            | -                       | 50        | 30            | 24                           | ND                   | <b>3a</b> |
| <b>3<sup>d</sup></b>  | H    | 4-F            | -                       | 50        | 90            | 55                           | ND                   | <b>3a</b> |
| <b>4<sup>e</sup></b>  | H    | 4-F            | MeCN                    | 50        | 90            | 72                           | ND                   | <b>3a</b> |
| <b>5<sup>f</sup></b>  | H    | 4-F            | MeCN                    | 50        | 90            | 90                           | 88                   | <b>3a</b> |
| <b>6<sup>f</sup></b>  | 4-Cl | 4-F            | MeCN                    | 50        | 90            | 90                           | 83                   | <b>3f</b> |
| <b>7<sup>f</sup></b>  | 4-Br | 4-F            | MeCN                    | 50        | 90            | 89                           | 88                   | <b>3i</b> |
| <b>8<sup>f</sup></b>  | 5-Br | 4-F            | MeCN                    | 50        | 90            | 90                           | 86                   | <b>3l</b> |
| <b>9<sup>f</sup></b>  | H    | 3-F            | MeCN                    | 50        | 90            | 59                           | ND                   | <b>3c</b> |
| <b>10<sup>f</sup></b> | H    | 3-F            | DMSO                    | 80        | 90            | 78                           | 75                   | <b>3c</b> |
| <b>11<sup>f</sup></b> | 4-Cl | 3-F            | DMSO                    | 80        | 90            | 80                           | 77                   | <b>3e</b> |
| <b>12<sup>f</sup></b> | 4-Br | 3-F            | DMSO                    | 80        | 90            | 79                           | 76                   | <b>3h</b> |
| <b>13<sup>f</sup></b> | 5-Br | 3-F            | DMSO                    | 80        | 90            | 80                           | 78                   | <b>3k</b> |
| <b>14<sup>f</sup></b> | H    | 2-F            | MeCN                    | 50        | 90            | 88                           | 84                   | <b>3a</b> |
| <b>15<sup>f</sup></b> | 4-Cl | 2-F            | MeCN                    | 50        | 90            | 86                           | 81                   | <b>3d</b> |
| <b>16<sup>f</sup></b> | 4-Br | 2-F            | MeCN                    | 50        | 90            | 85                           | 80                   | <b>3g</b> |
| <b>17<sup>f</sup></b> | 5-Br | 2-F            | MeCN                    | 50        | 90            | 86                           | 82                   | <b>3j</b> |

Reaction conditions: vbm 30 Hz,  $\phi_{\text{ball}} = 1.5$  cm, 10 mL SS jar, total mass of reagents = 85 mg, milling load 10 mg/mL, <sup>a</sup>Liquid Assisted Grinding,  $\eta = 0.4$   $\mu\text{L}/\text{mg}$ ; <sup>b</sup>Conversions were determined by UPLC, <sup>c</sup>Yield for isolated compound; <sup>d</sup>piperazine anhydrous (1 eq); <sup>e</sup>piperazine anhydrous (2 eq); <sup>f</sup>piperazine anhydrous (3 eq); ND = not determined.



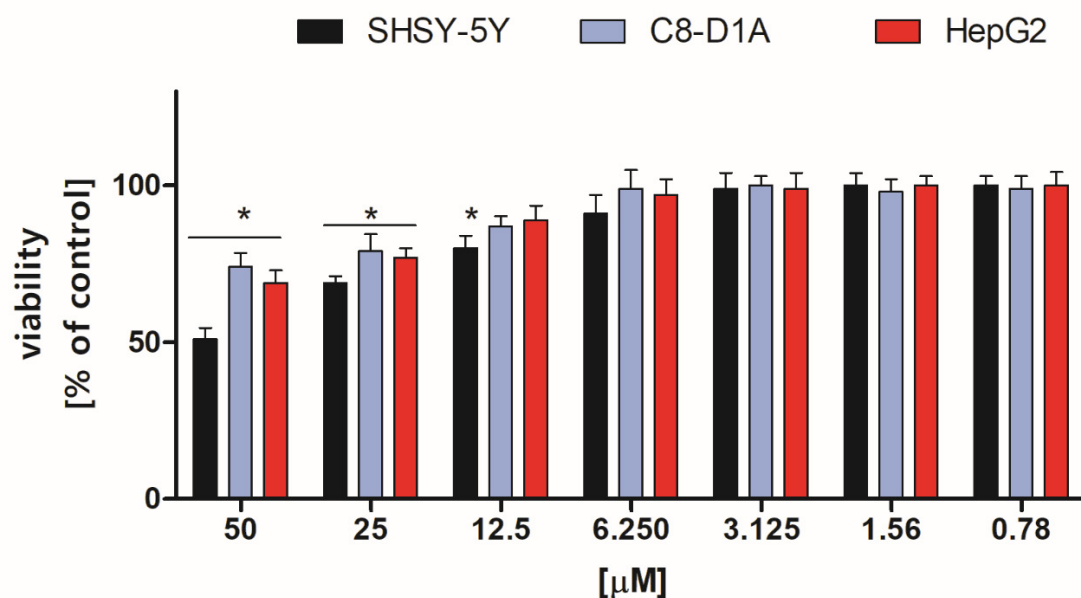

**Figure S1–S1.** The effect of compound **3g** on cellular viability in (A) SH-SY5Y (human neuroblastoma), (B) C8-1DA (mouse astrocytes), and (C) HepG2 (human hepatocellular carcinoma) cell lines. Cells were incubated in the presence of **3g** in concentration range 0.78–50 μM for 48 hours, then MTT assay was performed to assesses cellular viability. Graph represent cells viability calculated as percent of control (mean ± SD) of three independent experiments. Statistical analysis by one-way ANOVA showed significant differences between the groups ( $p < 0.05$ ) and was followed by the Dunnett’s multiple comparisons test, \*  $p \leq 0.05$ .

## 1. Procedure for radioligand binding assay

All experiments were carried out according to the previously published procedures [1–3]. HEK293 cells stably expressing human 5-HT<sub>1A</sub>, 5-HT<sub>6</sub>, 5-HT<sub>7b</sub> and D<sub>2L</sub> receptors (prepared with the use of Lipofectamine 2000) or CHO-K1 cells with plasmid containing the sequence coding for the human serotonin 5-HT<sub>2A</sub> receptor (Perkin Elmer) were maintained at 37 °C in a humidified atmosphere containing 5% CO<sub>2</sub> and grown in Dulbecco's Modified Eagle's Medium containing 10% dialyzed fetal bovine serum and 500 µg/ml G418 sulfate. For membrane preparation, cells were cultured in 150 cm<sup>2</sup> flasks, grown to 90% confluence, washed twice with pre-warmed to 37 °C phosphate buffered saline (PBS) and centrifuged (200 × g) in PBS containing 0.1 mM EDTA and 1 mM dithiothreitol. Prior to membrane preparation, pellets were stored at –80 °C. Cell pellets were thawed and homogenized in 10 volumes of assay buffer using an Ultra Turrax tissue homogenizer and centrifuged twice at 35,000 × g for 15 min at 4 °C, with incubation for 15 min at 37 °C between the centrifugations. The composition of the assay buffers was experimentally selected to achieve the maximum signal window.

**5-HT<sub>1A</sub>R:** 50 mM Tris HCl, 0.1 mM EDTA, 4 mM MgCl<sub>2</sub>, 10 µM pargyline and 0.1% ascorbate;  
**5-HT<sub>2A</sub>R:** 50 mM Tris HCl, 0.1 mM EDTA, 4 mM MgCl<sub>2</sub> and 0.1% ascorbate;  
**5-HT<sub>6</sub>R:** 50 mM Tris HCl, 0.5 mM EDTA and 4 mM MgCl<sub>2</sub>; **5-HT<sub>7b</sub>R:** 50 mM Tris HCl, 4 mM MgCl<sub>2</sub>, 10 µM pargyline and 0.1% ascorbate; **D<sub>2L</sub>R:** 50 mM Tris HCl, 1 mM EDTA, 4 mM MgCl<sub>2</sub>, 120 mM NaCl, 5 mM KCl, 1.5 mM CaCl<sub>2</sub> and 0.1% ascorbate).

All assays were carried out in a total volume of 200 µL in 96-well plates for 1 h at 37 °C, except 5-HT<sub>1A</sub>R and 5-HT<sub>2A</sub>R which were incubated at room temperature and 27 °C, respectively. The process of equilibration was terminated by rapid filtration through Unifilter plates with a 96-well cell harvester and radioactivity retained on the filters was quantified on a Microbeta plate reader (PerkinElmer, USA). For displacement studies the assay samples contained as radioligands (PerkinElmer, USA): 2.5 nM [<sup>3</sup>H]-8-OH-DPAT (135.2 Ci/ mmol) for 5-HT<sub>1A</sub>R; 1 nM [<sup>3</sup>H]-ketanserin (53.4 Ci/mmol) for 5-HT<sub>2A</sub>R; 2 nM [<sup>3</sup>H]-LSD (83.6 Ci/mmol) for 5-HT<sub>6</sub>R; 0.8 nM [<sup>3</sup>H]-5-CT (39.2 Ci/mmol) for 5-HT<sub>7</sub>R or 2.5 nM [<sup>3</sup>H]-raclopride (76.0 Ci/mmol) for D<sub>2L</sub>R. Non-specific binding was defined in the presence of 10 µM of 5-HT in 5-HT<sub>1A</sub>R and 5-HT<sub>7</sub>R binding experiments, 20 µM of mianserin for 5-HT<sub>2A</sub>R, 10 µM of methiothepine for 5-HT<sub>6</sub>R or 10 µM of haloperidol for D<sub>2L</sub>R binding assays. Each compound was tested in triplicate at 7 concentrations (10<sup>-10</sup>–10<sup>-4</sup> M). The inhibition constants (*K<sub>i</sub>*) were calculated from the Cheng-Prusoff equation [4].

## 2. Procedure for determination of functional activity at Gs signaling

### 2.1. Impact of compound **3e**, **3f** and **3g** on cAMP production in 1321N1 cells

The properties of evaluated compounds to inhibit cAMP production induced by 5-CT (1000 nM), a 5-HT<sub>6</sub>R agonist, was assessed according to previously published procedures [5,6]. The level of cAMP was measured using frozen recombinant 1321N1 cells expressing the human serotonin 5-HT<sub>6</sub>R (PerkinElmer). Total cAMP was measured using the LANCE cAMP detection kit (PerkinElmer), according to the manufacturer's recommendations. For quantification of cAMP levels, 2000 cells/well (5  $\mu$ L) were incubated with mixture of compound **3e**, **3f** and **3g** (5  $\mu$ L) for 30 min at room temperature in 384-well white opaque microtiter plate. After incubation, the reaction was stopped and cells were lysed by the addition of 10  $\mu$ L of working solution (5  $\mu$ L Eu-cAMP and 5  $\mu$ L ULIGHT-anti-cAMP) for 1 h at room temperature. Time-resolved fluorescence resonance energy transfer (TR-FRET) was detected by an Infinite M1000 Pro (Tecan) using instrument settings from LANCE cAMP detection kit manual. Compound was tested in triplicate at 8 concentrations ( $10^{-11}$ – $10^{-4}$  M).  $K_b$  values were calculated from Cheng–Prusoff equation specific for the analysis of functional inhibition curves:  $K_b = IC_{50}/(1+A/EC_{50})$  where A represents agonist concentration,  $IC_{50}$  the concentration of antagonist producing a 50% reduction in the response to agonist, and  $EC_{50}$  the agonist concentration which causes a half of the maximal response [4].

#### 1.1.1. Impact of evaluated compounds on cAMP production elicited by constitutively active 5-HT<sub>6</sub>R in NG108-15 cells

NG108-15 cells were grown in Dulbecco's modified Eagle's medium (DMEM) supplemented with 10% dialyzed fetal calf serum, 2% hypoxanthine/aminopterin/thymidine (Life technologies), and antibiotics. cAMP measurement was performed in cells transiently expressing 5-HT<sub>6</sub>R using the bioluminescence resonance energy transfer (BRET) sensor for cAMP, CAMYEL (cAMP sensor using YFP-Epac-RLuc) [7]. NG108-15 cells were cotransfected in suspension with 5-HT<sub>6</sub>R (0.5  $\mu$ g DNA/million cells) and CAMYEL constructs (1  $\mu$ g DNA/million cells), using Lipofectamine 2000, according to the manufacturer's protocol, and plated in white 96-well plates (Greiner), at a density of 50,000 cells per well in DMEM containing 2% dialyzed fetal calf serum. After 24 h of transfection, cells were washed with PBS containing calcium and magnesium. To test the functional properties of compound **3e**, **3f** and **3g** as well as the reference SB-258585, cells were treated with vehicle or with the tested compound at a concentration ranging from 0.1 nM to 10  $\mu$ M. Coelenterazine H (Molecular Probes) was added at a final concentration of 5  $\mu$ M, and incubated at room temperature for 5 min. BRET was measured using a Mithras LB 940 plate reader (Berthold Technologies). Expression of 5-

HT<sub>6</sub>R in NG108-15 cells induced a strong decrease in CAMYEL BRET signal, compared with cells transfected with an empty vector instead of the plasmid encoding the 5-HT<sub>6</sub>R. This decrease in CAMYEL BRET signal was thus used as an index of 5-HT<sub>6</sub>R constitutive activity at Gs signaling.

### **3. Procedure for evaluation of the effect of tested compounds on Cdk5-dependent neurite growth**

In line with previously reported methods [5,8], NG108-15 cells were transfected with plasmids encoding either cytosolic GFP or a GFP-tagged 5-HT<sub>6</sub>R in suspension using Lipofectamine 2000 (Life technologies) and plated on glass coverslips. Six hours after transfection, cells were treated with either DMSO (control), **3e**, **3f** and **3g** or SB-258585 for 48 h. Cells were fixed in 4% paraformaldehyde (PFA) supplemented with 4% sucrose for 10 min. PFA fluorescence was quenched by incubating the cells in PBS containing 0.1 M glycine, prior to mounting in Prolong Gold antifade reagent (Thermo Fisher Scientific). Cells were imaged using an AxioImagerZ1 microscope equipped with epifluorescence (Zeiss), using a 20 × objective for cultured cells, and neurite length was assessed using the Neuron J plugin of the ImageJ software (NIH).

## References

1. Kurczab, R.; Canale, V.; Satała, G.; Zajdel, P.; Bojarski, A.J. Amino Acid Hot Spots of Halogen Bonding: A Combined Theoretical and Experimental Case Study of the 5-HT(7) Receptor. *J. Med. Chem.* **2018**, *61*, 8717–8733. <https://doi.org/10.1021/acs.jmedchem.8b00828>.
2. Partyka, A.; Kurczab, R.; Canale, V.; Satała, G.; Marciniec, K.; Pasierb, A.; Jastrzębska-Więsek, M.; Pawłowski, M.; Wesołowska, A.; Bojarski, A.J.; et al. The Impact of The Halogen Bonding on D(2) and 5-HT(1A)/5-HT(7) Receptor Activity of Azinesulfonamides of 4-[(2-ethyl)piperidiny-1-yl]phenylpiperazines With Antipsychotic and Antidepressant Properties. *Bioorg. Med. Chem.* **2017**, *25*, 3638–3648. <https://doi.org/10.1016/j.bmc.2017.04.046>
3. Zajdel, P.; Kos, T.; Marciniec, K.; Satała, G.; Canale, V.; Kamiński, K.; Hołuj, M.; Lenda, T.; Koralewski, R.; Bednarski, M.; et al. Novel Multi-Target Azinesulfonamides of Cyclic Amine Derivatives as Potential Antipsychotics with Pro-Social and Pro-Cognitive Effects. *Eur. J. Med. Chem.* **2018**, *145*, 790–804. <https://doi.org/10.1016/j.ejmech.2018.01.002>.
4. Cheng, Y.; Prusoff, W.H. Relationship Between the Inhibition Constant (K<sub>i</sub>) and the Concentration of Inhibitor Which Causes 50 Per Cent Inhibition (I<sub>50</sub>) of an Enzymatic Reaction. *Biochem. Pharmacol.* **1973**, *22*, 3099–3108. [https://doi.org/10.1016/0006-2952\(73\)90196-2](https://doi.org/10.1016/0006-2952(73)90196-2).
5. Vanda, D.; Canale, V.; Chaumont-Dubel, S.; Kurczab, R.; Satała, G.; Koczurkiewicz-Adamczyk, P.; Krawczyk, M.; Pietruś, W.; Blicharz, K.; Pękala, E.; et al. Imidazopyridine-Based 5-HT(6) Receptor Neutral Antagonists: Impact of N(1)-Benzyl and N(1)-Phenylsulfonyl Fragments on Different Receptor Conformational States. *J. Med. Chem.* **2021**, *64*, 1180–1196. <https://doi.org/10.1021/acs.jmedchem.0c02009>.
6. Drop, M.; Jacquot, F.; Canale, V.; Chaumont-Dubel, S.; Walczak, M.; Satała, G.; Nosalska, K.; Mahoro, G.U.; Słoczyńska, K.; Piska, K.; et al. Neuropathic Pain-Alleviating Activity of Novel 5-HT(6) Receptor Inverse Agonists derived from 2-aryl-1H-pyrrole-3-carboxamide. *Bioorg. Chem.* **2021**, *115*, 105218. <https://doi.org/10.1016/j.bioorg.2021.105218>.
7. Jiang, L.I.; Collins, J.; Davis, R.; Lin, K.-M.; DeCamp, D.; Roach, T.; Hsueh, R.; Rebres, R.A.; Ross, E.M.; Taussig, R.; et al. Use of a cAMP BRET Sensor to Characterize a Novel Regulation of cAMP by the Sphingosine 1-Phosphate/G<sub>13</sub> Pathway. *J. Biol. Chem.* **2007**, *282*, 10576–10584. <https://doi.org/10.1074/jbc.M609695200>.
8. Grychowska, K.; Chaumont-Dubel, S.; Kurczab, R.; Koczurkiewicz, P.; Deville, C.; Krawczyk, M.; Pietruś, W.; Satała, G.; Buda, S.; Piska, K.; et al. Dual 5-HT(6) and D(3) Receptor Antagonists in a Group of 1H-Pyrrolo[3,2-c]quinolines with Neuroprotective and Procognitive Activity. *ACS Chem. Neurosci.* **2019**, *10*, 3183–3196. <https://doi.org/10.1021/acschemneuro.8b00618>.
